# Supplementary material for: Genome-wide investigation and expression analysis of AP2-ERF gene family in salt tolerant common bean
Source: PubMed Central journal article supplement (PMC4849109; doi:10.17179/excli2015-600), 2015-11-27
Supplement: EXCLI-14-1187-s-001.pdf [file EXCLI-14-1187-s-001.pdf]

**Supplementary material to:**

**GENOME-WIDE INVESTIGATION AND EXPRESSION ANALYSIS OF  
*AP2-ERF* GENE FAMILY IN SALT TOLERANT COMMON BEAN**

Musa Kavas<sup>1\*</sup>, Aslihan Kurt Kızıldoğan<sup>1</sup>, Gökhan Gökdemir<sup>1</sup>, Mehmet Cengiz Baloğlu<sup>2</sup>

<sup>1</sup> Ondokuz Mayıs University, Faculty of Agriculture, Department of Agricultural Biotechnology, Samsun, Turkey

<sup>2</sup> Kastamonu University, Faculty of Engineering and Architecture, Department of Genetics and Bioengineering, Kastamonu, Turkey

\* Corresponding author: Musa Kavas, Ondokuz Mayıs University, Faculty of Agriculture, Department of Agricultural Biotechnology, Samsun, Turkey; Tel: +903623121919-1158; Fax: +903624576034; E-mail: [musa.kavas@omu.edu.tr](mailto:musa.kavas@omu.edu.tr)

<http://dx.doi.org/10.17179/excli2015-600>

This is an Open Access article distributed under the terms of the Creative Commons Attribution License (<http://creativecommons.org/licenses/by/4.0/>).

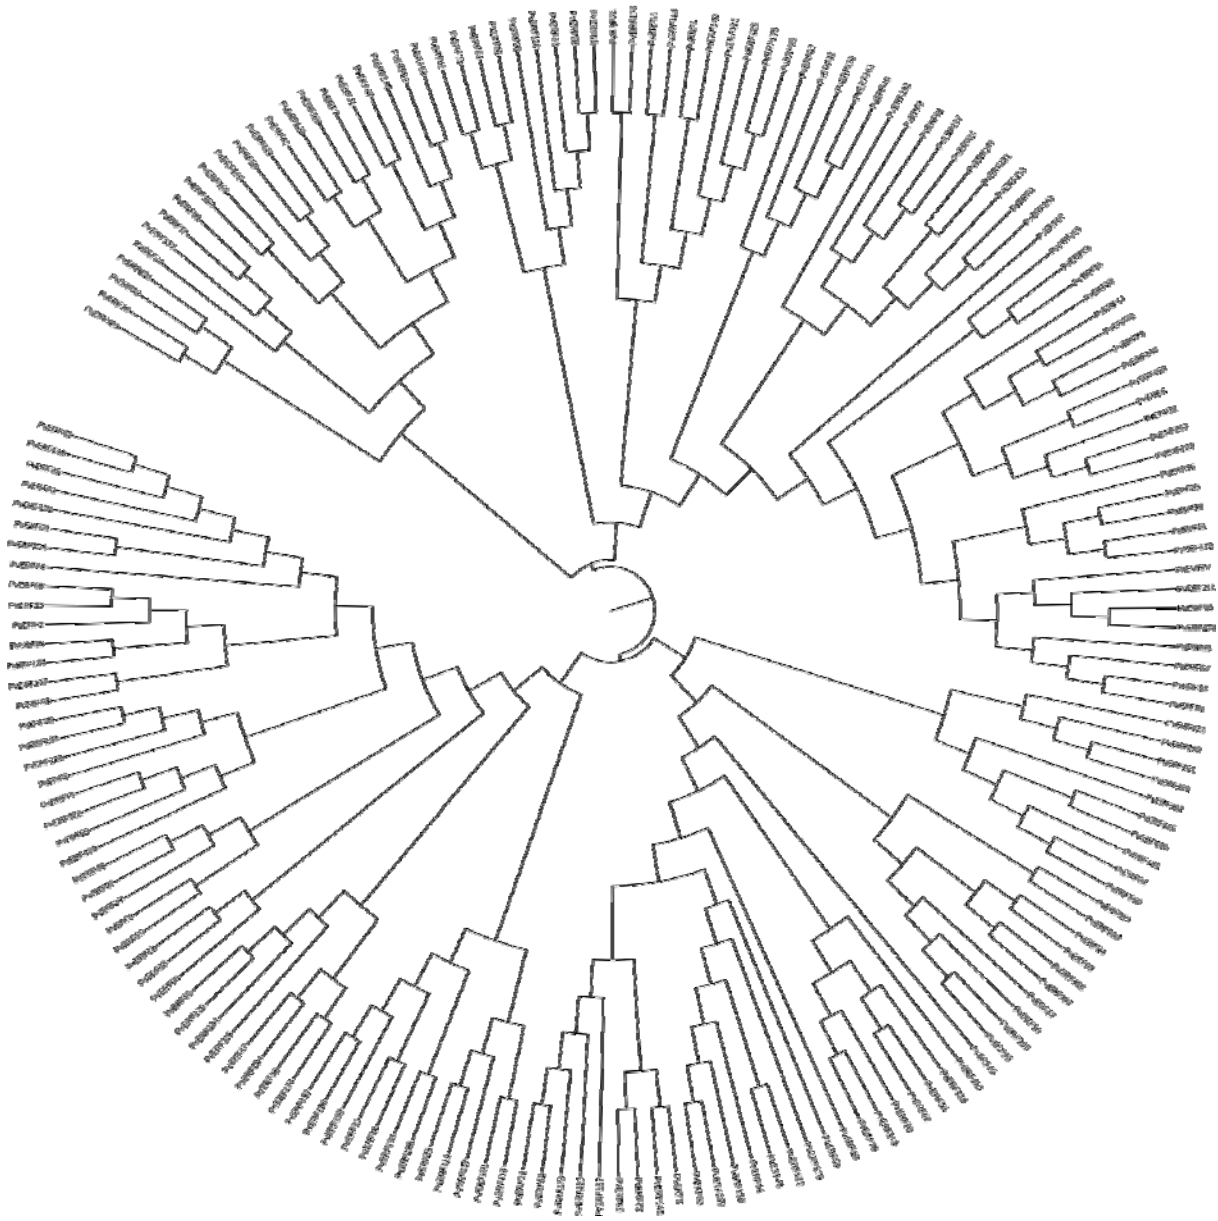

**Figure S1:** Phylogenetic tree constructed by the neighbor-joining method using AP2 family transcription factor domains in common bean and Arabidopsis. The numbers are bootstrap values based on 1000 iterations.

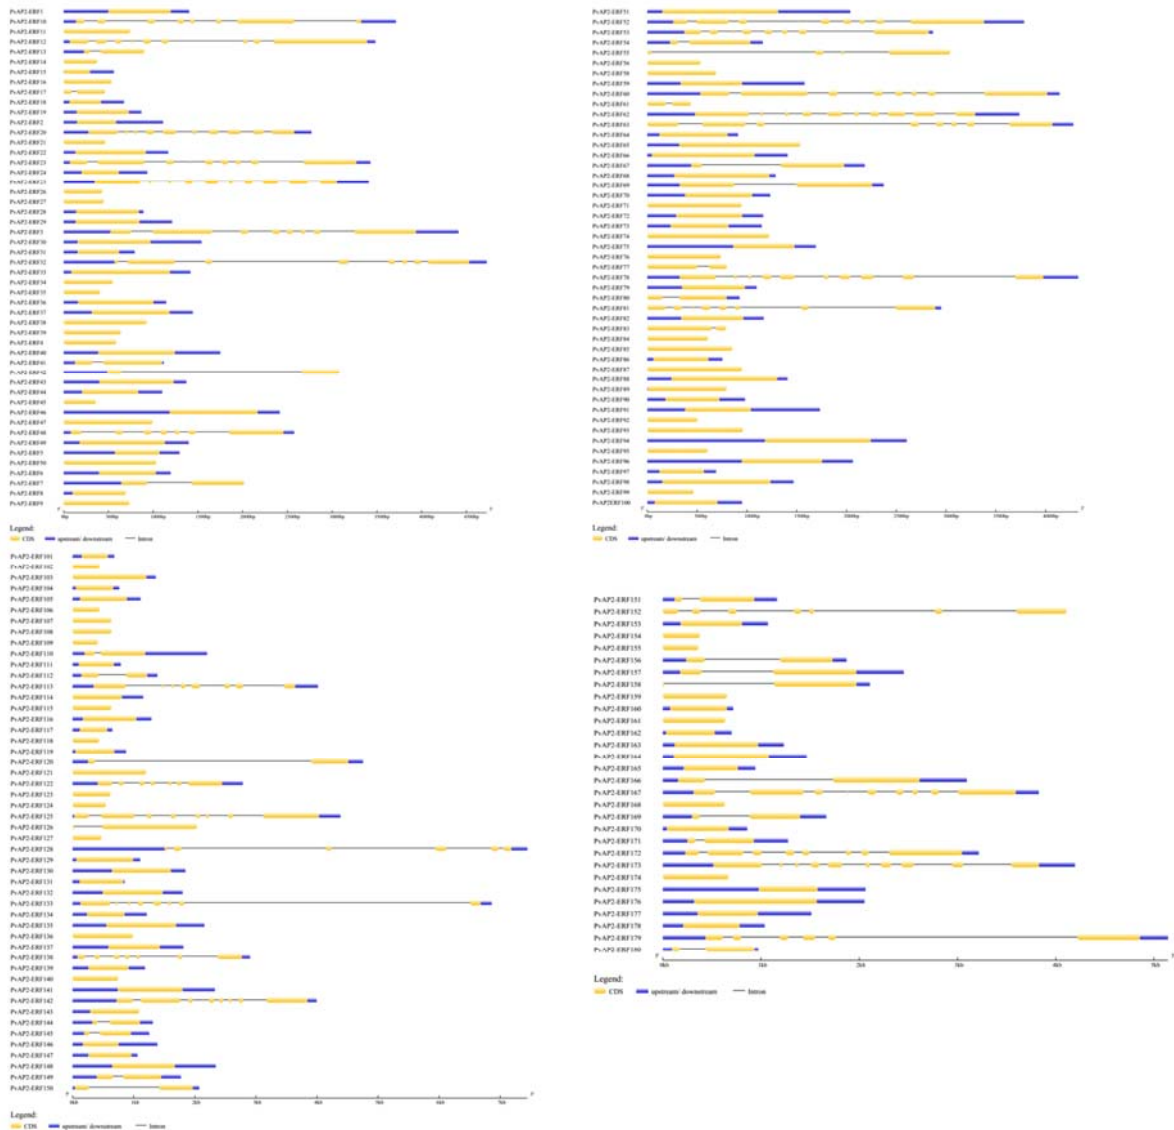

**Figure S2:** Structural analysis of 180 *PvAP2-ERF* genes drawn by the Gene Structure Display Server (GSDS). CDSs are represented by yellow boxes while blue ones indicate upstream and downstream region. Black lines represent introns.

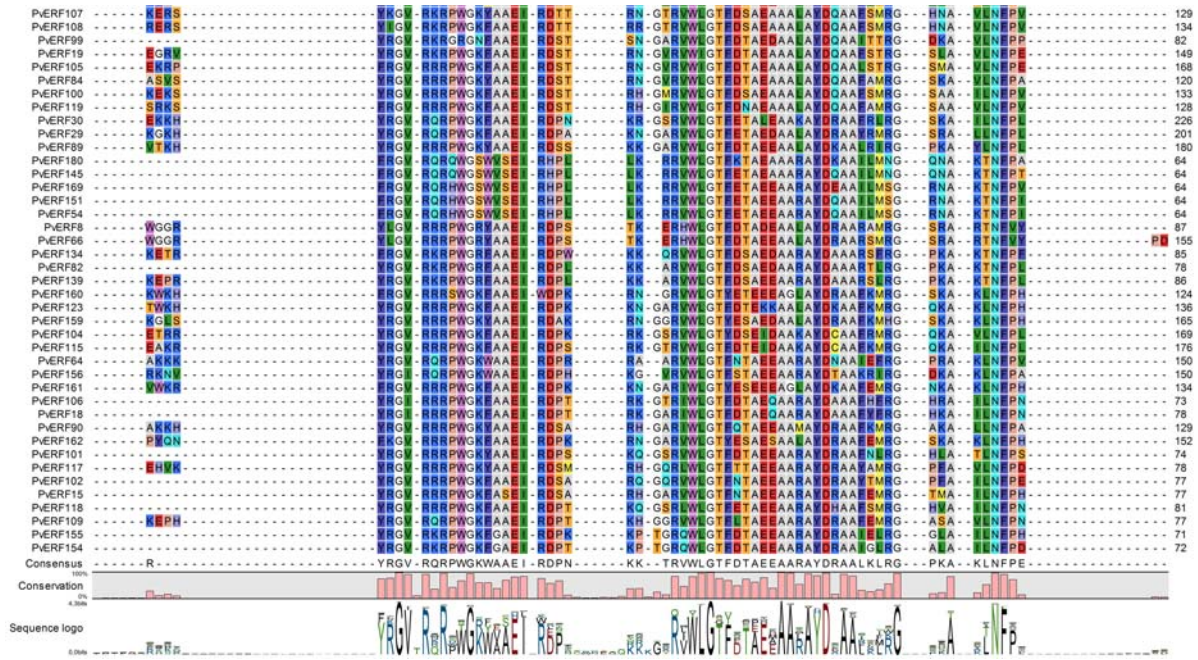

**Figure S3:** Multiple alignment of amino acid sequences of PvAP2-ERF proteins. It was performed with Muscle by using CLC Genomics Workbench 8.0 software. The conserved motifs belonging to AP2-ERF TFs in common bean were analysed using MEME.

**Table S1:** Primer sequences of *PvAP2-ERF* genes for qRT-PCR expression analysis

| Primer   | Forward                                | Reverse              | NCBI                           |
|----------|----------------------------------------|----------------------|--------------------------------|
| PvERF69  | PHAVU_004G092100g CTTGGCACATTTGACACTGA | AGAGGTGGAAGTCTCTAAC  | <a href="#">XM_007151923.1</a> |
| PvERF119 | PHAVU_007G273000g ACATGGATTGCTCACTCTCT | TTCTTCGTCTTCTTTGCAGC | <a href="#">XM_007145782.1</a> |
| PvERF100 | PHAVU_007G127800g CGCAAAGGAGAAAGTCCTAC | GTGTGGAGTCCCTAATCTCC | <a href="#">XM_007144028.1</a> |
| PvERF53  | PHAVU_003G153100g ATCTCGGAACTTACGCTACC | TGTTGGTGTGTTATTGGGC  | <a href="#">XM_007154791.1</a> |
| PvERF70  | PHAVU_004G122000g CAAATGGGTTTGTGAGGTGA | GCAAAGTTGAGACACGCATA | <a href="#">XM_007152281.1</a> |
| PvERF177 | PHAVU_011G125200g CACCAATTCCCTTTTCGGTT | GAGCCAGGTTAAGATCGAGA | <a href="#">XM_007132732.1</a> |
| PvERF111 | PHAVU_007G222500g GAGGAGGTGTTTAACATGCC | TCTACTGTGGTTTCCCATC  | <a href="#">XM_007145179.1</a> |
| PvERF150 | PHAVU_009G161000g CACCACTAGCAATGACCAAG | CCAGCAGTACCCATGATTTG | <a href="#">XM_007137787.1</a> |
| PvERF72  | PHAVU_004G169800g GTCCAATTCCAAGAAACGAG | GGATTTCCGACACCCATTTT | <a href="#">XM_007152840.1</a> |
| Skip16   | CACCAGGATGCAAAGTGG                     | ATCCGCTTGTCCCTTGAAC  | <a href="#">XM_007131876.1</a> |

**Table S2:** The molecular and physicochemical parameters of *PvAP2-ERF* family genes in common bean

| ID          | Phytozome Identifier | Chromosomes | Start and end positions (bp) | Length (bp) | CDS (bp) | Protein length (aa) | pI   | Molecular weight (Da) | Instability index | Stable or unstable | Solubility/Score | NCBI Accession number |
|-------------|----------------------|-------------|------------------------------|-------------|----------|---------------------|------|-----------------------|-------------------|--------------------|------------------|-----------------------|
| PvAP2-ERF1  | Phvul.001G010400     | Chr01       | 931454-932855                | 1402        | 798      | 265                 | 4,93 | 29057,1               | 45,19             | unstable           | insoluble; 0.574 | XM_007160647          |
| PvAP2-ERF2  | Phvul.001G023700     | Chr01       | 2101326-2102436              | 1111        | 537      | 178                 | 9,61 | 20485                 | 41,69             | unstable           | insoluble; 0.503 | XM_007160808          |
| PvAP2-ERF3  | Phvul.001G031200     | Chr01       | 2907733-2912245              | 4513        | 2064     | 687                 | 6,64 | 75432,4               | 49,51             | unstable           | soluble; 0.608   | XM_007160891          |
| PvAP2-ERF4  | Phvul.001G044500     | Chr01       | 4680371-4681060              | 690         | 690      | 229                 | 4,78 | 25706,2               | 40,08             | unstable           | soluble; 0.649   | XM_007161059          |
| PvAP2-ERF5  | Phvul.001G046900     | Chr01       | 5091472-5092865              | 1394        | 600      | 199                 | 8,86 | 22372,2               | 63,16             | unstable           | insoluble; 0.484 | XM_007161090          |
| PvAP2-ERF6  | Phvul.001G073800     | Chr01       | 10050549-10051844            | 1296        | 735      | 244                 | 5,77 | 26835                 | 49,26             | unstable           | insoluble; 0.571 | XM_007161432          |
| PvAP2-ERF7  | Phvul.001G084000     | Chr01       | 14986698-14988815            | 2118        | 981      | 326                 | 6,53 | 36576,4               | 62,9              | unstable           | insoluble; 0.329 | XM_007161550          |
| PvAP2-ERF8  | Phvul.001G099700     | Chr01       | 22388801-22389496            | 696         | 696      | 231                 | 5,24 | 25456,7               | 49,83             | unstable           | insoluble; 0.501 | XM_007161743          |
| PvAP2-ERF9  | Phvul.001G111800     | Chr01       | 30786425-30787261            | 837         | 837      | 278                 | 6,19 | 30646                 | 43,73             | unstable           | insoluble; 0.460 | XM_007161894          |
| PvAP2-ERF10 | Phvul.001G131300     | Chr01       | 37223732-37227544            | 3813        | 1254     | 417                 | 8,85 | 46658                 | 54,45             | unstable           | insoluble; 0.546 | XM_007162122          |
| PvAP2-ERF11 | Phvul.001G136100     | Chr01       | 38195399-38196241            | 843         | 843      | 280                 | 5,13 | 31503                 | 55,59             | unstable           | soluble; 0.659   | XM_007162182          |
| PvAP2-ERF12 | Phvul.001G137500     | Chr01       | 38448464-38452047            | 3584        | 1845     | 614                 | 4,98 | 68086,8               | 40,63             | unstable           | insoluble; 0.454 | XM_007162197          |
| PvAP2-ERF13 | Phvul.001G137600     | Chr01       | 38463292-38464293            | 1002        | 657      | 218                 | 4,95 | 24504,2               | 38                | stable             | insoluble; 0.419 | XM_007162198          |
| PvAP2-ERF14 | Phvul.001G157600     | Chr01       | 41586154-41586630            | 477         | 477      | 158                 | 9,88 | 17846,5               | 53,47             | unstable           | insoluble; 0.434 | XM_007162443          |
| PvAP2-ERF15 | Phvul.001G160100     | Chr01       | 41963965-41964626            | 662         | 393      | 130                 | 6,83 | 14743,7               | 43,74             | unstable           | soluble; 0.652   | XM_007162473          |
| PvAP2-ERF16 | Phvul.001G160200     | Chr01       | 41973984-41974619            | 636         | 636      | 211                 | 9,39 | 23643,6               | 47,71             | unstable           | insoluble; 0.516 | XM_007162474          |
| PvAP2-ERF17 | Phvul.001G160300     | Chr01       | 41988449-41989014            | 566         | 513      | 170                 | 4,72 | 19198,6               | 61,82             | unstable           | insoluble; 0.452 | XM_007162475          |
| PvAP2-ERF18 | Phvul.001G160400     | Chr01       | 42010504-42011278            | 775         | 453      | 150                 | 6,29 | 16476,9               | 43,86             | unstable           | soluble; 0.823   | XM_007162476          |
| PvAP2-ERF19 | Phvul.001G160500     | Chr01       | 42037682-42038650            | 969         | 684      | 227                 | 4,94 | 25611,2               | 42,74             | unstable           | soluble; 0.706   | XM_007162477          |
| PvAP2-ERF20 | Phvul.001G174400     | Chr01       | 43723288-43726156            | 2869        | 1380     | 459                 | 6,23 | 50414,7               | 49,98             | unstable           | insoluble; 0.550 | XM_007162655          |
| PvAP2-ERF21 | Phvul.001G187100     | Chr01       | 45289609-45290175            | 567         | 567      | 188                 | 5,02 | 20166,4               | 48,7              | unstable           | soluble; 0.708   | XM_007162797          |
| PvAP2-ERF22 | Phvul.001G251200     | Chr01       | 50886895-50888163            | 1269        | 888      | 295                 | 5,45 | 32793,6               | 45,74             | unstable           | insoluble; 0.538 | XM_007163576          |
| PvAP2-ERF23 | Phvul.002G009100     | Chr02       | 1058028-1061555              | 3528        | 1794     | 598                 | 6,88 | 67205,9               | 58,1              | unstable           | insoluble; 0.580 | XM_007156629          |
| PvAP2-ERF24 | Phvul.002G016700     | Chr02       | 1837177-1838211              | 1035        | 516      | 171                 | 8,6  | 18862,2               | 57,28             | unstable           | soluble; 0.631   | XM_007156715          |
| PvAP2-ERF25 | Phvul.002G016900     | Chr02       | 1860815-1864323              | 3509        | 1515     | 504                 | 7,72 | 55438,1               | 56,76             | unstable           | soluble; 0.707   | XM_007156717          |
| PvAP2-ERF26 | Phvul.002G035100     | Chr02       | 3499002-3499535              | 534         | 534      | 177                 | 4,97 | 19497,4               | 67,56             | unstable           | soluble; 0.747   | XM_007156936          |
| PvAP2-ERF27 | Phvul.002G035900     | Chr02       | 3545434-3545982              | 549         | 549      | 182                 | 5,71 | 20227,7               | 53,55             | unstable           | insoluble; 0.487 | XM_007156945          |
| PvAP2-ERF28 | Phvul.002G036000     | Chr02       | 3561530-3562521              | 992         | 801      | 266                 | 6,12 | 30003,8               | 60,57             | unstable           | soluble; 0.694   | XM_007156946          |
| PvAP2-ERF29 | Phvul.002G055700     | Chr02       | 5668036-5669347              | 1312        | 813      | 270                 | 6,76 | 29405                 | 56,74             | unstable           | insoluble; 0.570 | XM_007157197          |
| PvAP2-ERF30 | Phvul.002G055800     | Chr02       | 5691260-5692900              | 1641        | 915      | 304                 | 8,45 | 33907,1               | 50,65             | unstable           | insoluble; 0.549 | XM_007157198          |
| PvAP2-ERF31 | Phvul.002G056800     | Chr02       | 5810982-5811876              | 895         | 564      | 187                 | 9,28 | 20656,5               | 43,05             | unstable           | soluble; 0.667   | XM_007157208          |
| PvAP2-ERF32 | Phvul.002G146400     | Chr02       | 28359488-28364314            | 4827        | 1512     | 503                 | 6,55 | 55023,5               | 42,06             | unstable           | insoluble; 0.580 | XM_007158299          |
| PvAP2-ERF33 | Phvul.002G149500     | Chr02       | 28972219-28973736            | 1518        | 1203     | 400                 | 6,43 | 44372                 | 54,56             | unstable           | insoluble; 0.578 | XM_007158332          |
| PvAP2-ERF34 | Phvul.002G153900     | Chr02       | 29528341-29528991            | 651         | 651      | 216                 | 5,11 | 24572,3               | 77,64             | unstable           | insoluble; 0.525 | XM_007158394          |
| PvAP2-ERF35 | Phvul.002G154000     | Chr02       | 29572213-29572719            | 507         | 507      | 168                 | 6,42 | 18511,9               | 55,04             | unstable           | insoluble; 0.549 | XM_007158395          |
| PvAP2-ERF36 | Phvul.002G162500     | Chr02       | 30433762-30435007            | 1246        | 942      | 313                 | 5,44 | 35023,9               | 50,33             | unstable           | soluble; 0.639   | XM_007158496          |
| PvAP2-ERF37 | Phvul.002G163700     | Chr02       | 30545248-30546790            | 1543        | 969      | 322                 | 8,7  | 35266,6               | 41,85             | unstable           | soluble; 0.600   | XM_007158510          |
| PvAP2-ERF38 | Phvul.002G168900     | Chr02       | 31177497-31178525            | 1029        | 1029     | 342                 | 5,03 | 38663,8               | 65,31             | unstable           | soluble; 0.676   | XM_007158569          |
| PvAP2-ERF39 | Phvul.002G237300     | Chr02       | 40301361-40302101            | 741         | 741      | 246                 | 8,27 | 27875,3               | 31,33             | stable             | insoluble; 0.327 | XM_007159370          |
| PvAP2-ERF40 | Phvul.002G254500     | Chr02       | 42080727-42082576            | 1850        | 957      | 318                 | 5,41 | 35548,7               | 44,79             | unstable           | insoluble; 0.496 | XM_007159576          |
| PvAP2-ERF41 | Phvul.002G267800     | Chr02       | 43308758-43309976            | 1219        | 957      | 318                 | 6,73 | 35365,6               | 65,52             | unstable           | soluble; 0.772   | XM_007159732          |

|             |                  |       |                   |      |      |     |       |         |       |          |                  |              |
|-------------|------------------|-------|-------------------|------|------|-----|-------|---------|-------|----------|------------------|--------------|
| PvAP2-ERF42 | Phvul.002G281300 | Chr02 | 44487105-44490185 | 3081 | 681  | 226 | 9,92  | 25017   | 67,25 | unstable | soluble; 0.774   | XM_007159890 |
| PvAP2-ERF43 | Phvul.002G295700 | Chr02 | 45929067-45930538 | 1472 | 930  | 309 | 5     | 34265   | 53,76 | unstable | soluble; 0.642   | XM_007160075 |
| PvAP2-ERF44 | Phvul.002G310200 | Chr02 | 47177131-47178333 | 1203 | 729  | 242 | 4,87  | 26154,9 | 54,14 | unstable | soluble; 0.856   | XM_007160240 |
| PvAP2-ERF45 | Phvul.002G315900 | Chr02 | 47666399-47666860 | 462  | 462  | 153 | 8,78  | 17335,5 | 62,78 | unstable | soluble; 0.777   | XM_007160308 |
| PvAP2-ERF46 | Phvul.003G035500 | Chr03 | 3558866-3561380   | 2515 | 1083 | 360 | 4,71  | 39370,5 | 50,93 | unstable | soluble; 0.632   | XM_007153379 |
| PvAP2-ERF47 | Phvul.003G064800 | Chr03 | 9171392-9172486   | 1095 | 1095 | 364 | 6,67  | 40165,7 | 58,54 | unstable | insoluble; 0.578 | XM_007153724 |
| PvAP2-ERF48 | Phvul.003G069000 | Chr03 | 10190940-10193616 | 2677 | 1206 | 404 | 9,34  | 45576,7 | 60,13 | unstable | soluble; 0.604   | XM_007153776 |
| PvAP2-ERF49 | Phvul.003G102500 | Chr03 | 25181566-25183062 | 1497 | 1053 | 350 | 5,55  | 38898,6 | 55,54 | unstable | insoluble; 0.382 | XM_007154181 |
| PvAP2-ERF50 | Phvul.003G107900 | Chr03 | 26813958-26815094 | 1137 | 1137 | 378 | 9,87  | 43617   | 32,92 | stable   | insoluble; 0.454 | XM_007154248 |
| PvAP2-ERF51 | Phvul.003G111800 | Chr03 | 28178527-28180564 | 2038 | 1164 | 387 | 8,96  | 42253,5 | 40,55 | unstable | soluble; 0.654   | XM_007154292 |
| PvAP2-ERF52 | Phvul.003G144500 | Chr03 | 34150168-34153951 | 3784 | 1581 | 526 | 8,55  | 56410,6 | 42,69 | unstable | soluble; 0.639   | XM_007154688 |
| PvAP2-ERF53 | Phvul.003G153100 | Chr03 | 35757558-35760426 | 2869 | 1107 | 368 | 6,68  | 42544,2 | 49,54 | unstable | insoluble; 0.598 | XM_007154791 |
| PvAP2-ERF54 | Phvul.003G165000 | Chr03 | 37339186-37340346 | 1161 | 693  | 230 | 6,39  | 26177,1 | 66,1  | unstable | soluble; 0.683   | XM_007154944 |
| PvAP2-ERF55 | Phvul.003G180000 | Chr03 | 39171521-39174562 | 3042 | 759  | 252 | 9,43  | 28553,7 | 42,94 | unstable | insoluble; 0.445 | XM_007155115 |
| PvAP2-ERF56 | Phvul.003G212700 | Chr03 | 42784293-42784829 | 537  | 537  | 178 | 4,95  | 19308,6 | 56,04 | unstable | soluble; 0.687   | XM_007155504 |
| PvAP2-ERF57 | Phvul.003G212800 | Chr03 | 42804542-42805711 | 1170 | 882  | 293 | 5,26  | 32295   | 54,7  | unstable | insoluble; 0.405 | XM_007155505 |
| PvAP2-ERF58 | Phvul.003G222600 | Chr03 | 44044998-44045690 | 693  | 693  | 230 | 5,66  | 25399,8 | 47,68 | unstable | soluble; 0.787   | XM_007155625 |
| PvAP2-ERF59 | Phvul.003G223600 | Chr03 | 44193652-44195231 | 1580 | 618  | 205 | 4,84  | 22308,8 | 59,27 | unstable | insoluble; 0.532 | XM_007155636 |
| PvAP2-ERF60 | Phvul.003G232600 | Chr03 | 45498765-45502904 | 4140 | 1980 | 659 | 6,27  | 73664,4 | 57,59 | unstable | insoluble; 0.575 | XM_007155737 |
| PvAP2-ERF61 | Phvul.003G241700 | Chr03 | 46504117-46504556 | 440  | 381  | 126 | 9,2   | 13914,3 | 43,37 | unstable | insoluble; 0.327 | XM_007155841 |
| PvAP2-ERF62 | Phvul.003G241900 | Chr03 | 46544077-46547812 | 3736 | 1554 | 517 | 6,24  | 57051,6 | 61,82 | unstable | soluble; 0.702   | XM_007155843 |
| PvAP2-ERF63 | Phvul.003G288500 | Chr03 | 51447092-51451369 | 4278 | 1566 | 521 | 5,71  | 58204,7 | 48,9  | unstable | soluble; 0.649   | XM_007156405 |
| PvAP2-ERF64 | Phvul.003G292400 | Chr03 | 51831261-51832171 | 911  | 684  | 227 | 5,64  | 25001   | 40,59 | unstable | insoluble; 0.478 | XM_007156453 |
| PvAP2-ERF65 | Phvul.004G031900 | Chr04 | 3566458-3567993   | 1536 | 1215 | 404 | 4,71  | 45460,3 | 48,01 | unstable | soluble; 0.684   | XM_007151203 |
| PvAP2-ERF66 | Phvul.004G068900 | Chr04 | 10270274-10271682 | 1409 | 1032 | 343 | 5,6   | 37981,9 | 49,12 | unstable | soluble; 0.641   | XM_007151643 |
| PvAP2-ERF67 | Phvul.004G069900 | Chr04 | 10524334-10526517 | 2184 | 747  | 248 | 8,63  | 26614,2 | 46,23 | unstable | soluble; 0.807   | XM_007151656 |
| PvAP2-ERF68 | Phvul.004G081200 | Chr04 | 14013830-14015119 | 1290 | 954  | 317 | 5,66  | 36018,1 | 41,62 | unstable | insoluble; 0.432 | XM_007151794 |
| PvAP2-ERF69 | Phvul.004G092100 | Chr04 | 24438791-24441164 | 2374 | 1308 | 435 | 6,37  | 46732,2 | 61,74 | unstable | insoluble; 0.584 | XM_007151923 |
| PvAP2-ERF70 | Phvul.004G122000 | Chr04 | 39326716-39327951 | 1236 | 675  | 224 | 6,4   | 25625,7 | 68,63 | unstable | insoluble; 0.407 | XM_007152281 |
| PvAP2-ERF71 | Phvul.004G157600 | Chr04 | 43964844-43965791 | 948  | 948  | 315 | 4,77  | 35578,4 | 52,8  | unstable | soluble; 0.712   | XM_007152702 |
| PvAP2-ERF72 | Phvul.004G169800 | Chr04 | 45126736-45127899 | 1164 | 663  | 220 | 5,1   | 23836,3 | 51,69 | unstable | soluble; 0.755   | XM_007152840 |
| PvAP2-ERF73 | Phvul.005G074700 | Chr05 | 13295710-13296859 | 1150 | 582  | 193 | 10,06 | 20929,5 | 59,57 | unstable | soluble; 0.630   | XM_007149427 |
| PvAP2-ERF74 | Phvul.005G105200 | Chr05 | 31203406-31204629 | 1224 | 1224 | 407 | 5,93  | 45836,3 | 61,23 | unstable | soluble; 0.650   | XM_007149804 |
| PvAP2-ERF75 | Phvul.005G111200 | Chr05 | 32566424-32568115 | 1692 | 615  | 204 | 6,45  | 21872,2 | 56,66 | unstable | soluble; 0.781   | XM_007149869 |
| PvAP2-ERF76 | Phvul.005G126300 | Chr05 | 35040940-35041680 | 741  | 741  | 246 | 5,86  | 27360,5 | 54,95 | unstable | soluble; 0.705   | XM_007150034 |
| PvAP2-ERF77 | Phvul.005G126600 | Chr05 | 35099239-35100039 | 801  | 684  | 227 | 9,51  | 25694,2 | 44,6  | unstable | insoluble; 0.563 | XM_007150037 |
| PvAP2-ERF78 | Phvul.005G138300 | Chr05 | 36714215-36718541 | 4327 | 1383 | 475 | 7,69  | 52476,3 | 45,71 | unstable | soluble; 0.780   | XM_007150186 |
| PvAP2-ERF79 | Phvul.005G170600 | Chr05 | 39420680-39421777 | 1098 | 633  | 210 | 5,67  | 23501,5 | 52,44 | unstable | insoluble; 0.573 | XM_007150595 |
| PvAP2-ERF80 | Phvul.005G180600 | Chr05 | 40253016-40253942 | 927  | 627  | 208 | 5,61  | 23756,4 | 56,33 | unstable | soluble; 0.622   | XM_007150725 |
| PvAP2-ERF81 | Phvul.005G183700 | Chr05 | 40443575-40446525 | 2951 | 966  | 321 | 9,36  | 36157,4 | 60,51 | unstable | soluble; 0.671   | XM_007150762 |
| PvAP2-ERF82 | Phvul.006G047800 | Chr06 | 16171033-16172202 | 1170 | 624  | 207 | 5,95  | 22673,1 | 62,41 | unstable | insoluble; 0.569 | XM_007146458 |
| PvAP2-ERF83 | Phvul.006G080000 | Chr06 | 19885920-19886712 | 793  | 753  | 250 | 8,94  | 28018,5 | 53,57 | unstable | insoluble; 0.589 | XM_007146839 |
| PvAP2-ERF84 | Phvul.006G106100 | Chr06 | 22259920-22260531 | 612  | 612  | 203 | 5,13  | 22844,5 | 57,93 | unstable | soluble; 0.670   | XM_007147161 |
| PvAP2-ERF85 | Phvul.006G110200 | Chr06 | 22619263-22620117 | 855  | 855  | 284 | 4,81  | 32699,4 | 53,31 | unstable | soluble; 0.750   | XM_007147212 |

|              |                  |       |                   |      |      |     |      |         |       |          |                  |              |
|--------------|------------------|-------|-------------------|------|------|-----|------|---------|-------|----------|------------------|--------------|
| PvAP2-ERF86  | Phvul.006G114100 | Chr06 | 22942518-22943272 | 755  | 552  | 183 | 4,92 | 20309,7 | 62,07 | unstable | insoluble; 0.491 | XM_007147260 |
| PvAP2-ERF87  | Phvul.006G163100 | Chr06 | 27418948-27419898 | 951  | 951  | 316 | 6,05 | 34649,1 | 51,3  | unstable | soluble; 0.612   | XM_007147823 |
| PvAP2-ERF88  | Phvul.006G173500 | Chr06 | 28425098-28426505 | 1408 | 1062 | 353 | 5,43 | 38026,2 | 39,86 | stable   | soluble; 0.700   | XM_007147954 |
| PvAP2-ERF89  | Phvul.006G179700 | Chr06 | 28949911-28950707 | 797  | 792  | 263 | 5,37 | 29608   | 56,25 | unstable | soluble; 0.683   | XM_007148025 |
| PvAP2-ERF90  | Phvul.006G179800 | Chr06 | 28956271-28957252 | 982  | 540  | 179 | 7,88 | 19891,8 | 61,56 | unstable | insoluble; 0.319 | XM_007148026 |
| PvAP2-ERF91  | Phvul.006G183100 | Chr06 | 29213340-29215073 | 1734 | 660  | 219 | 8    | 23556,9 | 46,63 | unstable | soluble; 0.668   | XM_007148072 |
| PvAP2-ERF92  | Phvul.006G183200 | Chr06 | 29232219-29232722 | 504  | 504  | 167 | 9,72 | 18196,7 | 75,11 | unstable | soluble; 0.691   | XM_007148073 |
| PvAP2-ERF93  | Phvul.007G002900 | Chr07 | 201437-202399     | 963  | 963  | 320 | 5,92 | 36796,4 | 37,77 | stable   | soluble; 0.675   | XM_007142556 |
| PvAP2-ERF94  | Phvul.007G027000 | Chr07 | 1987568-1990173   | 2606 | 1062 | 353 | 4,56 | 39102   | 60,43 | unstable | insoluble; 0.449 | XM_007142845 |
| PvAP2-ERF95  | Phvul.007G066500 | Chr07 | 5928454-5929059   | 606  | 606  | 201 | 6    | 22418,1 | 55,45 | unstable | insoluble; 0.552 | XM_007143304 |
| PvAP2-ERF96  | Phvul.007G082000 | Chr07 | 8065792-8067856   | 2065 | 807  | 268 | 6,98 | 28556,4 | 79,6  | unstable | soluble; 0.663   | XM_007143499 |
| PvAP2-ERF97  | Phvul.007G086600 | Chr07 | 8592476-8593166   | 691  | 447  | 148 | 6,1  | 16520,7 | 78,07 | unstable | insoluble; 0.489 | XM_007143553 |
| PvAP2-ERF98  | Phvul.007G102800 | Chr07 | 11606561-11608030 | 1470 | 1086 | 361 | 8,95 | 39472,3 | 38,38 | stable   | soluble; 0.640   | XM_007143739 |
| PvAP2-ERF99  | Phvul.007G121200 | Chr07 | 21423708-21424172 | 465  | 465  | 154 | 9,2  | 17838,4 | 55,71 | unstable | soluble; 0.731   | XM_007143943 |
| PvAP2-ERF100 | Phvul.007G127800 | Chr07 | 27274067-27275018 | 952  | 630  | 209 | 5    | 23155,6 | 65,61 | unstable | insoluble; 0.543 | XM_007144028 |
| PvAP2-ERF101 | Phvul.007G128000 | Chr07 | 27559597-27560279 | 683  | 429  | 142 | 9,07 | 15911,7 | 70,21 | unstable | soluble; 0.794   | XM_007144030 |
| PvAP2-ERF102 | Phvul.007G128100 | Chr07 | 27720034-27720477 | 444  | 444  | 147 | 5,95 | 16432,9 | 47,32 | unstable | soluble; 0.756   | XM_007144031 |
| PvAP2-ERF103 | Phvul.007G135300 | Chr07 | 33385083-33386444 | 1362 | 1209 | 402 | 8,56 | 44331,9 | 40,45 | unstable | soluble; 0.616   | XM_007144120 |
| PvAP2-ERF104 | Phvul.007G135900 | Chr07 | 33583547-33584310 | 764  | 612  | 203 | 8,13 | 23058,9 | 61,59 | unstable | insoluble; 0.496 | XM_007144129 |
| PvAP2-ERF105 | Phvul.007G193300 | Chr07 | 43116184-43117296 | 1113 | 768  | 255 | 5,46 | 28549,5 | 58,66 | unstable | soluble; 0.685   | XM_007144842 |
| PvAP2-ERF106 | Phvul.007G193400 | Chr07 | 43136157-43136600 | 444  | 444  | 147 | 5,62 | 16597,4 | 62,85 | unstable | soluble; 0.828   | XM_007144843 |
| PvAP2-ERF107 | Phvul.007G193700 | Chr07 | 43194246-43194881 | 636  | 636  | 211 | 6,08 | 23812,6 | 58,32 | unstable | soluble; 0.652   | XM_007144848 |
| PvAP2-ERF108 | Phvul.007G193800 | Chr07 | 43227132-43227770 | 639  | 639  | 212 | 5,98 | 24026   | 57,25 | unstable | soluble; 0.659   | XM_007144849 |
| PvAP2-ERF109 | Phvul.007G193900 | Chr07 | 43237645-43238058 | 414  | 414  | 137 | 5,73 | 15563,3 | 56,2  | unstable | soluble; 0.778   | XM_007144850 |
| PvAP2-ERF110 | Phvul.007G217800 | Chr07 | 45677796-45679996 | 2201 | 900  | 299 | 5,63 | 33667,5 | 41,19 | unstable | soluble; 0.643   | XM_007145125 |
| PvAP2-ERF111 | Phvul.007G222500 | Chr07 | 46214380-46215168 | 789  | 576  | 191 | 9,4  | 21805,8 | 43,4  | unstable | insoluble; 0.548 | XM_007145179 |
| PvAP2-ERF112 | Phvul.007G222600 | Chr07 | 46221519-46222906 | 1388 | 633  | 210 | 5,48 | 22518   | 54,37 | unstable | soluble; 0.642   | XM_007145180 |
| PvAP2-ERF113 | Phvul.007G240200 | Chr07 | 48016768-48020784 | 4017 | 1233 | 410 | 9,16 | 45025,4 | 56,46 | unstable | soluble; 0.676   | XM_007145387 |
| PvAP2-ERF114 | Phvul.007G241600 | Chr07 | 48138008-48139162 | 1155 | 807  | 268 | 8,74 | 29731,9 | 59,78 | unstable | insoluble; 0.522 | XM_007145406 |
| PvAP2-ERF115 | Phvul.007G241800 | Chr07 | 48154568-48155203 | 636  | 636  | 211 | 5,9  | 23762,6 | 54,74 | unstable | soluble; 0.641   | XM_007145408 |
| PvAP2-ERF116 | Phvul.007G255100 | Chr07 | 49321858-49323149 | 1292 | 879  | 292 | 5,58 | 33036,9 | 57,37 | unstable | insoluble; 0.504 | XM_007145567 |
| PvAP2-ERF117 | Phvul.007G272800 | Chr07 | 51105207-51105858 | 652  | 450  | 149 | 6,11 | 16623,1 | 65,78 | unstable | soluble; 0.801   | XM_007145780 |
| PvAP2-ERF118 | Phvul.007G272900 | Chr07 | 51111180-51111614 | 435  | 435  | 144 | 9,38 | 16758,8 | 53,4  | unstable | soluble; 0.835   | XM_007145781 |
| PvAP2-ERF119 | Phvul.007G273000 | Chr07 | 51127595-51128470 | 876  | 639  | 212 | 6,97 | 23321,3 | 72,33 | unstable | soluble; 0.745   | XM_007145782 |
| PvAP2-ERF120 | Phvul.008G019600 | Chr08 | 1707540-1712293   | 4754 | 726  | 241 | 7,33 | 27149,7 | 62,89 | unstable | soluble; 0.601   | XM_007139261 |
| PvAP2-ERF121 | Phvul.008G039300 | Chr08 | 3311273-3312478   | 1206 | 1206 | 401 | 4,61 | 45535,3 | 59,62 | unstable | soluble; 0.689   | XM_007139486 |
| PvAP2-ERF122 | Phvul.008G043500 | Chr08 | 3742495-3745281   | 2787 | 1182 | 393 | 7,11 | 43915,7 | 51,65 | unstable | insoluble; 0.506 | XM_007139538 |
| PvAP2-ERF123 | Phvul.008G046400 | Chr08 | 4004959-4005582   | 624  | 624  | 207 | 9,24 | 23170,9 | 58,67 | unstable | insoluble; 0.564 | XM_007139574 |
| PvAP2-ERF124 | Phvul.008G046500 | Chr08 | 4010611-4011156   | 546  | 546  | 181 | 7,88 | 20177,5 | 55,2  | unstable | insoluble; 0.584 | XM_007139575 |
| PvAP2-ERF125 | Phvul.008G052000 | Chr08 | 4601738-4606123   | 4386 | 2070 | 689 | 6,34 | 75694,4 | 49,63 | unstable | insoluble; 0.415 | XM_007139639 |
| PvAP2-ERF126 | Phvul.008G092800 | Chr08 | 9500856-9502893   | 2038 | 1578 | 525 | 5,69 | 58645,3 | 48,79 | unstable | insoluble; 0.494 | XM_007140140 |
| PvAP2-ERF127 | Phvul.008G098900 | Chr08 | 10466381-10466854 | 474  | 474  | 157 | 9,14 | 17505,3 | 52,31 | unstable | soluble; 0.730   | XM_007140217 |
| PvAP2-ERF128 | Phvul.008G131500 | Chr08 | 20402865-20410309 | 7445 | 690  | 230 | 9    | 25992,3 | 63,76 | unstable | soluble; 0.638   | XM_007140602 |
| PvAP2-ERF129 | Phvul.008G141000 | Chr08 | 23916631-23917738 | 1108 | 930  | 309 | 6,06 | 33899,2 | 48,1  | unstable | soluble; 0.682   | XM_007140714 |



|              |                  |       |                   |      |      |     |       |         |       |          |                  |              |
|--------------|------------------|-------|-------------------|------|------|-----|-------|---------|-------|----------|------------------|--------------|
| PvAP2-ERF130 | Phvul.008G159400 | Chr08 | 40680584-40682430 | 1847 | 963  | 320 | 5,37  | 36312,7 | 56,11 | unstable | soluble; 0.677   | XM_007140945 |
| PvAP2-ERF131 | Phvul.008G165000 | Chr08 | 42621369-42622218 | 850  | 717  | 238 | 4,94  | 25857,9 | 72,72 | unstable | soluble; 0.619   | XM_007141009 |
| PvAP2-ERF132 | Phvul.008G172200 | Chr08 | 45116054-45117855 | 1802 | 984  | 327 | 5,53  | 36013,3 | 57,23 | unstable | soluble; 0.656   | XM_007141099 |
| PvAP2-ERF133 | Phvul.008G185400 | Chr08 | 48884848-48891709 | 6862 | 1077 | 358 | 6,1   | 40305,4 | 46,68 | unstable | soluble; 0.634   | XM_007141099 |
| PvAP2-ERF134 | Phvul.008G214700 | Chr08 | 52704530-52705744 | 1215 | 615  | 204 | 7,77  | 22424,1 | 56,13 | unstable | soluble; 0.764   | XM_007141600 |
| PvAP2-ERF135 | Phvul.008G220400 | Chr08 | 53286141-53288298 | 2158 | 1143 | 380 | 4,92  | 42145   | 39,49 | stable   | insoluble; 0.381 | XM_007141667 |
| PvAP2-ERF136 | Phvul.008G222400 | Chr08 | 53485082-53486071 | 990  | 990  | 329 | 8,39  | 36041   | 44,13 | unstable | soluble; 0.627   | XM_007141687 |
| PvAP2-ERF137 | Phvul.008G246000 | Chr08 | 56074147-56075959 | 1813 | 753  | 280 | 5,76  | 30843,2 | 52,78 | unstable | insoluble; 0.589 | XM_007141963 |
| PvAP2-ERF138 | Phvul.008G253600 | Chr08 | 56759415-56762319 | 2905 | 909  | 302 | 5,83  | 34412,7 | 54,79 | unstable | soluble; 0.662   | XM_007142050 |
| PvAP2-ERF139 | Phvul.008G271100 | Chr08 | 58092188-58093372 | 1185 | 660  | 219 | 8,88  | 23636,3 | 52,88 | unstable | insoluble; 0.529 | XM_007142267 |
| PvAP2-ERF140 | Phvul.009G013200 | Chr09 | 2059353-2060102   | 750  | 750  | 249 | 4,71  | 27586,3 | 38,98 | stable   | soluble; 0.732   | XM_007135981 |
| PvAP2-ERF141 | Phvul.009G029600 | Chr09 | 6536069-6538397   | 2329 | 1062 | 353 | 6,51  | 38677   | 58,95 | unstable | soluble; 0.625   | XM_007136171 |
| PvAP2-ERF142 | Phvul.009G074300 | Chr09 | 12286871-12290865 | 3995 | 1974 | 657 | 6,9   | 72516,7 | 52    | unstable | soluble; 0.609   | XM_007136726 |
| PvAP2-ERF143 | Phvul.009G084400 | Chr09 | 13327339-13328429 | 1091 | 804  | 267 | 4,92  | 29419,5 | 54,99 | unstable | soluble; 0.631   | XM_007136851 |
| PvAP2-ERF144 | Phvul.009G089300 | Chr09 | 13898357-13899669 | 1313 | 576  | 191 | 9,48  | 22239,3 | 59,03 | unstable | insoluble; 0.365 | XM_007136909 |
| PvAP2-ERF145 | Phvul.009G093600 | Chr09 | 14411949-14413203 | 1255 | 594  | 197 | 6,23  | 21850,3 | 46,49 | unstable | soluble; 0.715   | XM_007136967 |
| PvAP2-ERF146 | Phvul.009G109600 | Chr09 | 16431520-16432907 | 1388 | 585  | 194 | 5,46  | 21559,4 | 40,11 | unstable | insoluble; 0.580 | XM_007137158 |
| PvAP2-ERF147 | Phvul.009G123300 | Chr09 | 18302891-18303953 | 1063 | 708  | 235 | 5,38  | 25428,4 | 63,64 | unstable | insoluble; 0.467 | XM_007137327 |
| PvAP2-ERF148 | Phvul.009G137000 | Chr09 | 20103112-20105454 | 2343 | 1026 | 341 | 4,78  | 38280,6 | 55,23 | unstable | insoluble; 0.560 | XM_007137501 |
| PvAP2-ERF149 | Phvul.009G137900 | Chr09 | 20264478-20266250 | 1773 | 891  | 296 | 9,41  | 32439,7 | 57,15 | unstable | soluble; 0.655   | XM_007137511 |
| PvAP2-ERF150 | Phvul.009G161000 | Chr09 | 23312039-23314113 | 2075 | 777  | 258 | 6,14  | 28835,2 | 63,87 | unstable | insoluble; 0.582 | XM_007137787 |
| PvAP2-ERF151 | Phvul.009G196900 | Chr09 | 29159605-29160767 | 1163 | 636  | 211 | 8,5   | 23974,9 | 63,99 | unstable | soluble; 0.601   | XM_007138238 |
| PvAP2-ERF152 | Phvul.009G206500 | Chr09 | 30520376-30524486 | 4111 | 1041 | 346 | 6,61  | 39530,4 | 55,13 | unstable | insoluble; 0.531 | XM_007138348 |
| PvAP2-ERF153 | Phvul.009G225000 | Chr09 | 33327983-33329052 | 1070 | 627  | 208 | 4,57  | 23074,4 | 59,22 | unstable | insoluble; 0.347 | XM_007138569 |
| PvAP2-ERF154 | Phvul.009G240800 | Chr09 | 35418233-35418610 | 378  | 378  | 125 | 5,16  | 14314,9 | 53,35 | unstable | soluble; 0.770   | XM_007138767 |
| PvAP2-ERF155 | Phvul.009G240900 | Chr09 | 35430515-35430877 | 363  | 363  | 120 | 5,56  | 13331,8 | 64,17 | unstable | soluble; 0.793   | XM_007138768 |
| PvAP2-ERF156 | Phvul.009G251600 | Chr09 | 36449776-36451645 | 1870 | 726  | 241 | 8,64  | 26209,6 | 44,06 | unstable | insoluble; 0.474 | XM_007138885 |
| PvAP2-ERF157 | Phvul.009G262200 | Chr09 | 37365318-37367770 | 2453 | 1068 | 355 | 5,13  | 39462,6 | 40,25 | unstable | insoluble; 0.476 | XM_007139006 |
| PvAP2-ERF158 | Phvul.010G035200 | Chr10 | 5211022-52113130  | 2109 | 855  | 284 | 5,21  | 33293,3 | 55,24 | unstable | soluble; 0.713   | XM_007134232 |
| PvAP2-ERF159 | Phvul.010G050500 | Chr10 | 8020695-8021348   | 654  | 654  | 217 | 5,97  | 23746,4 | 46,44 | unstable | insoluble; 0.504 | XM_007134415 |
| PvAP2-ERF160 | Phvul.010G050600 | Chr10 | 8042080-8042795   | 716  | 579  | 192 | 9,3   | 21430,2 | 58,05 | unstable | soluble; 0.635   | XM_007134416 |
| PvAP2-ERF161 | Phvul.010G050700 | Chr10 | 8078193-8078828   | 636  | 636  | 211 | 9,39  | 23994,2 | 58,04 | unstable | insoluble; 0.596 | XM_007134417 |
| PvAP2-ERF162 | Phvul.010G050800 | Chr10 | 8082893-8083593   | 701  | 495  | 164 | 8,13  | 17655,4 | 40,84 | unstable | insoluble; 0.493 | XM_007134418 |
| PvAP2-ERF163 | Phvul.010G054000 | Chr10 | 8503366-8504597   | 1232 | 852  | 283 | 5,07  | 31175,8 | 43,03 | unstable | soluble; 0.734   | XM_007134452 |
| PvAP2-ERF164 | Phvul.010G092300 | Chr10 | 34005917-34007381 | 1465 | 969  | 322 | 8,12  | 34668,3 | 63,71 | unstable | insoluble; 0.420 | XM_007134925 |
| PvAP2-ERF165 | Phvul.010G114900 | Chr10 | 38090570-38091511 | 942  | 552  | 183 | 9,27  | 20476,2 | 58,57 | unstable | insoluble; 0.477 | XM_007135205 |
| PvAP2-ERF166 | Phvul.010G124700 | Chr10 | 39467544-39470639 | 3096 | 1155 | 384 | 4,87  | 42688,3 | 42    | unstable | soluble; 0.621   | XM_007135318 |
| PvAP2-ERF167 | Phvul.010G130200 | Chr10 | 40027019-40030846 | 3828 | 1743 | 580 | 6,32  | 63706   | 51,61 | unstable | soluble; 0.626   | XM_007135383 |
| PvAP2-ERF168 | Phvul.010G146600 | Chr10 | 41789538-41790170 | 633  | 633  | 210 | 5,3   | 23025,7 | 59,28 | unstable | insoluble; 0.436 | XM_007135585 |
| PvAP2-ERF169 | Phvul.010G154900 | Chr10 | 42398336-42399999 | 1664 | 594  | 197 | 6,45  | 22274,9 | 65,96 | unstable | soluble; 0.679   | XM_007135682 |
| PvAP2-ERF170 | Phvul.010G158700 | Chr10 | 42752077-42752935 | 859  | 630  | 209 | 10,04 | 22802,8 | 31,94 | stable   | insoluble; 0.390 | XM_007135729 |
| PvAP2-ERF171 | Phvul.010G159500 | Chr10 | 42802726-42804000 | 1275 | 588  | 195 | 6,71  | 22013,5 | 60,18 | unstable | insoluble; 0.572 | XM_007135737 |
| PvAP2-ERF172 | Phvul.011G058000 | Chr11 | 5016893-5020109   | 3217 | 1635 | 544 | 6,03  | 60221,1 | 46,56 | unstable | soluble; 0.624   | XM_007131935 |
| PvAP2-ERF173 | Phvul.011G071100 | Chr11 | 6338128-6342324   | 4197 | 1413 | 485 | 6,24  | 53472,1 | 47,48 | unstable | soluble; 0.714   | XM_007132099 |

|              |                  |       |                        |      |      |     |      |         |       |          |                  |              |
|--------------|------------------|-------|------------------------|------|------|-----|------|---------|-------|----------|------------------|--------------|
| PvAP2-ERF174 | Phvul.011G091400 | Chr11 | 9148323-9148991        | 669  | 669  | 222 | 5,27 | 24412,1 | 46,3  | unstable | soluble; 0.673   | XM_007132336 |
| PvAP2-ERF175 | Phvul.011G107800 | Chr11 | 12892620-12894683      | 2064 | 600  | 199 | 8,73 | 21443,9 | 44,19 | unstable | soluble; 0.712   | XM_007132528 |
| PvAP2-ERF176 | Phvul.011G118600 | Chr11 | 19321983-19324035      | 2053 | 1251 | 416 | 5,52 | 46738,7 | 73,62 | unstable | soluble; 0.708   | XM_007132652 |
| PvAP2-ERF177 | Phvul.011G125200 | Chr11 | 26734318-26735830      | 1513 | 615  | 204 | 9,57 | 22862,7 | 62,32 | unstable | insoluble; 0.569 | XM_007132732 |
| PvAP2-ERF178 | Phvul.011G162900 | Chr11 | 42720583-42721619      | 1037 | 576  | 191 | 9,39 | 20836,2 | 63,05 | unstable | insoluble; 0.541 | XM_007133172 |
| PvAP2-ERF179 | Phvul.011G187400 | Chr11 | 46403162-46408304      | 5143 | 1197 | 398 | 6,09 | 44689,1 | 67,19 | unstable | insoluble; 0.595 | XM_007133475 |
| PvAP2-ERF180 | Phvul.L006500    |       | scaffold_91:9073-10046 | 974  | 576  | 191 | 6,96 | 21264,9 | 49,52 | unstable | insoluble; 0.460 | XM_007163845 |

|         |                     |
|---------|---------------------|
| PvERF1  | insoluble;<br>0.574 |
| PvERF2  | insoluble;<br>0.503 |
| PvERF3  | soluble;<br>0.608   |
| PvERF4  | soluble;<br>0.649   |
| PvERF5  | insoluble;<br>0.484 |
| PvERF6  | insoluble;<br>0.571 |
| PvERF7  | insoluble;<br>0.329 |
| PvERF8  | insoluble;<br>0.501 |
| PvERF9  | insoluble;<br>0.460 |
| PvERF10 | insoluble;<br>0.546 |
| PvERF11 | soluble;<br>0.659   |
| PvERF12 | insoluble;<br>0.454 |
| PvERF13 | insoluble;<br>0.419 |
| PvERF14 | insoluble;<br>0.434 |
| PvERF15 | soluble;<br>0.652   |
| PvERF16 | insoluble;<br>0.516 |
| PvERF17 | insoluble;<br>0.452 |
| PvERF18 | soluble;<br>0.823   |
| PvERF19 | soluble;<br>0.706   |
| PvERF20 | insoluble;<br>0.550 |
| PvERF21 | soluble;<br>0.708   |
| PvERF22 | insoluble;<br>0.538 |
| PvERF23 | insoluble;<br>0.580 |
| PvERF24 | soluble;<br>0.631   |
| PvERF25 | soluble;<br>0.707   |
| PvERF26 | soluble;<br>0.747   |
| PvERF27 | insoluble;<br>0.487 |
| PvERF28 | soluble;<br>0.694   |
| PvERF29 | insoluble;<br>0.570 |
| PvERF30 | insoluble;<br>0.549 |
| PvERF31 | soluble;<br>0.667   |
| PvERF32 | insoluble;<br>0.580 |
| PvERF33 | insoluble;<br>0.578 |
| PvERF34 | insoluble;<br>0.525 |
| PvERF35 | insoluble;<br>0.549 |
| PvERF36 | soluble;<br>0.639   |

|         |                     |
|---------|---------------------|
| PvERF37 | soluble;<br>0.600   |
| PvERF38 | soluble;<br>0.676   |
| PvERF39 | insoluble;<br>0.327 |
| PvERF40 | insoluble;<br>0.496 |
| PvERF41 | soluble;<br>0.772   |
| PvERF42 | soluble;<br>0.774   |
| PvERF43 | soluble;<br>0.642   |
| PvERF44 | soluble;<br>0.856   |
| PvERF45 | soluble;<br>0.777   |
| PvERF46 | soluble;<br>0.632   |
| PvERF47 | insoluble;<br>0.578 |
| PvERF48 | soluble;<br>0.604   |
| PvERF49 | insoluble;<br>0.382 |
| PvERF50 | insoluble;<br>0.454 |
| PvERF51 | soluble;<br>0.654   |
| PvERF52 | soluble;<br>0.639   |
| PvERF53 | insoluble;<br>0.598 |
| PvERF54 | soluble;<br>0.683   |
| PvERF55 | insoluble;<br>0.445 |
| PvERF56 | soluble;<br>0.687   |
| PvERF57 | insoluble;<br>0.405 |
| PvERF58 | soluble;<br>0.787   |
| PvERF59 | insoluble;<br>0.532 |
| PvERF60 | insoluble;<br>0.575 |
| PvERF61 | insoluble;<br>0.327 |
| PvERF62 | soluble;<br>0.702   |
| PvERF63 | soluble;<br>0.649   |
| PvERF64 | insoluble;<br>0.478 |
| PvERF65 | soluble;<br>0.684   |
| PvERF66 | soluble;<br>0.641   |
| PvERF67 | soluble;<br>0.807   |
| PvERF68 | insoluble;<br>0.432 |
| PvERF69 | insoluble;<br>0.584 |
| PvERF70 | insoluble;<br>0.407 |
| PvERF71 | soluble;<br>0.712   |
| PvERF72 | soluble;<br>0.755   |

|          |                     |
|----------|---------------------|
| PvERF73  | soluble;<br>0.630   |
| PvERF74  | soluble;<br>0.650   |
| PvERF75  | soluble;<br>0.781   |
| PvERF76  | soluble;<br>0.705   |
| PvERF77  | insoluble;<br>0.563 |
| PvERF78  | soluble;<br>0.780   |
| PvERF79  | insoluble;<br>0.573 |
| PvERF80  | soluble;<br>0.622   |
| PvERF81  | soluble;<br>0.671   |
| PvERF82  | insoluble;<br>0.569 |
| PvERF83  | insoluble;<br>0.589 |
| PvERF84  | soluble;<br>0.670   |
| PvERF85  | soluble;<br>0.750   |
| PvERF86  | insoluble;<br>0.491 |
| PvERF87  | soluble;<br>0.612   |
| PvERF88  | soluble;<br>0.700   |
| PvERF89  | soluble;<br>0.683   |
| PvERF90  | insoluble;<br>0.319 |
| PvERF91  | soluble;<br>0.668   |
| PvERF92  | soluble;<br>0.691   |
| PvERF93  | soluble;<br>0.675   |
| PvERF94  | insoluble;<br>0.449 |
| PvERF95  | insoluble;<br>0.552 |
| PvERF96  | soluble;<br>0.663   |
| PvERF97  | insoluble;<br>0.489 |
| PvERF98  | soluble;<br>0.640   |
| PvERF99  | soluble;<br>0.731   |
| PvERF100 | insoluble;<br>0.543 |
| PvERF101 | soluble;<br>0.794   |
| PvERF102 | soluble;<br>0.756   |
| PvERF103 | soluble;<br>0.616   |
| PvERF104 | insoluble;<br>0.496 |
| PvERF105 | soluble;<br>0.685   |
| PvERF106 | soluble;<br>0.828   |
| PvERF107 | soluble;<br>0.652   |
| PvERF108 | soluble;<br>0.659   |

|          |                     |
|----------|---------------------|
| PvERF109 | soluble;<br>0.778   |
| PvERF110 | soluble;<br>0.643   |
| PvERF111 | insoluble;<br>0.548 |
| PvERF112 | soluble;<br>0.642   |
| PvERF113 | soluble;<br>0.676   |
| PvERF114 | insoluble;<br>0.522 |
| PvERF115 | soluble;<br>0.641   |
| PvERF116 | insoluble;<br>0.504 |
| PvERF117 | soluble;<br>0.801   |
| PvERF118 | soluble;<br>0.835   |
| PvERF119 | soluble;<br>0.745   |
| PvERF120 | soluble;<br>0.601   |
| PvERF121 | soluble;<br>0.689   |
| PvERF122 | insoluble;<br>0.506 |
| PvERF123 | insoluble;<br>0.564 |
| PvERF124 | insoluble;<br>0.584 |
| PvERF125 | insoluble;<br>0.415 |
| PvERF126 | insoluble;<br>0.494 |
| PvERF127 | soluble;<br>0.730   |
| PvERF128 | soluble;<br>0.638   |
| PvERF129 | soluble;<br>0.682   |
| PvERF130 | soluble;<br>0.677   |
| PvERF131 | soluble;<br>0.619   |
| PvERF132 | soluble;<br>0.656   |
| PvERF133 | soluble;<br>0.634   |
| PvERF134 | soluble;<br>0.764   |
| PvERF135 | insoluble;<br>0.381 |
| PvERF136 | soluble;<br>0.627   |
| PvERF137 | insoluble;<br>0.589 |
| PvERF138 | soluble;<br>0.662   |
| PvERF139 | insoluble;<br>0.529 |
| PvERF140 | soluble;<br>0.732   |
| PvERF141 | soluble;<br>0.625   |
| PvERF142 | soluble;<br>0.609   |
| PvERF143 | soluble;<br>0.631   |
| PvERF144 | insoluble;<br>0.365 |

|          |                     |
|----------|---------------------|
| PvERF145 | soluble;<br>0.715   |
| PvERF146 | insoluble;<br>0.580 |
| PvERF147 | insoluble;<br>0.467 |
| PvERF148 | insoluble;<br>0.560 |
| PvERF149 | soluble;<br>0.655   |
| PvERF150 | insoluble;<br>0.582 |
| PvERF151 | soluble;<br>0.601   |
| PvERF152 | insoluble;<br>0.531 |
| PvERF153 | insoluble;<br>0.347 |
| PvERF154 | soluble;<br>0.770   |
| PvERF155 | soluble;<br>0.793   |
| PvERF156 | insoluble;<br>0.474 |
| PvERF157 | insoluble;<br>0.476 |
| PvERF158 | soluble;<br>0.713   |
| PvERF159 | insoluble;<br>0.504 |
| PvERF160 | soluble;<br>0.635   |
| PvERF161 | insoluble;<br>0.596 |
| PvERF162 | insoluble;<br>0.493 |
| PvERF163 | soluble;<br>0.734   |
| PvERF164 | insoluble;<br>0.420 |
| PvERF165 | insoluble;<br>0.477 |
| PvERF166 | soluble;<br>0.621   |
| PvERF167 | soluble;<br>0.626   |
| PvERF168 | insoluble;<br>0.436 |
| PvERF169 | soluble;<br>0.679   |
| PvERF170 | insoluble;<br>0.390 |
| PvERF171 | insoluble;<br>0.572 |
| PvERF172 | soluble;<br>0.624   |
| PvERF173 | soluble;<br>0.714   |
| PvERF174 | soluble;<br>0.673   |
| PvERF175 | soluble;<br>0.712   |
| PvERF176 | soluble;<br>0.708   |
| PvERF177 | insoluble;<br>0.569 |
| PvERF178 | insoluble;<br>0.541 |
| PvERF179 | insoluble;<br>0.595 |
| PvERF180 | insoluble;<br>0.460 |

| Query            | Phytozome Identifier |
|------------------|----------------------|
| Phvul.001G010400 | Phvul.001G010400     |
| Phvul.001G023700 | Phvul.001G023700     |
| Phvul.001G031200 | Phvul.001G031200     |
| Phvul.001G044500 | Phvul.001G044500     |
| Phvul.001G046900 | Phvul.001G046900     |
| Phvul.001G073800 | Phvul.001G073800     |
| Phvul.001G084000 | Phvul.001G084000     |
| Phvul.001G099700 | Phvul.001G099700     |
| Phvul.001G111800 | Phvul.001G111800     |
| Phvul.001G131300 | Phvul.001G131300     |
| Phvul.001G136100 | Phvul.001G136100     |
| Phvul.001G137500 | Phvul.001G137500     |
| Phvul.001G137600 | Phvul.001G137600     |
| Phvul.001G157600 | Phvul.001G157600     |
| Phvul.001G160100 | Phvul.001G160100     |
| Phvul.001G160200 | Phvul.001G160200     |
| Phvul.001G160300 | Phvul.001G160300     |
| Phvul.001G160400 | Phvul.001G160400     |
| Phvul.001G160500 | Phvul.001G160500     |
| Phvul.001G174400 | Phvul.001G174400     |
| Phvul.001G187100 | Phvul.001G187100     |
| Phvul.001G251200 | Phvul.001G251200     |
| Phvul.002G009100 | Phvul.002G009100     |
| Phvul.002G016700 | Phvul.002G016700     |
| Phvul.002G016900 | Phvul.002G016900     |
| Phvul.002G035100 | Phvul.002G035100     |
| Phvul.002G035900 | Phvul.002G035900     |
| Phvul.002G036000 | Phvul.002G036000     |
| Phvul.002G055700 | Phvul.002G055700     |
| Phvul.002G055800 | Phvul.002G055800     |
| Phvul.002G056800 | Phvul.002G056800     |
| Phvul.002G146400 | Phvul.002G146400     |
| Phvul.002G149500 | Phvul.002G149500     |
| Phvul.002G153900 | Phvul.002G153900     |
| Phvul.002G154000 | Phvul.002G154000     |
| Phvul.002G162500 | Phvul.002G162500     |
| Phvul.002G163700 | Phvul.002G163700     |
| Phvul.002G168900 | Phvul.002G168900     |
| Phvul.002G237300 | Phvul.002G237300     |
| Phvul.002G254500 | Phvul.002G254500     |
| Phvul.002G267800 | Phvul.002G267800     |
| Phvul.002G281300 | Phvul.002G281300     |
| Phvul.002G295700 | Phvul.002G295700     |
| Phvul.002G310200 | Phvul.002G310200     |
| Phvul.002G315900 | Phvul.002G315900     |
| Phvul.003G035500 | Phvul.003G035500     |
| Phvul.003G064800 | Phvul.003G064800     |
| Phvul.003G069000 | Phvul.003G069000     |
| Phvul.003G102500 | Phvul.003G102500     |
| Phvul.003G107900 | Phvul.003G107900     |



|                  |                  |
|------------------|------------------|
| Phvul.003G111800 | Phvul.003G111800 |
| Phvul.003G144500 | Phvul.003G144500 |
| Phvul.003G153100 | Phvul.003G153100 |
| Phvul.003G165000 | Phvul.003G165000 |
| Phvul.003G180000 | Phvul.003G180000 |
| Phvul.003G212700 | Phvul.003G212700 |
| Phvul.003G212800 | Phvul.003G212800 |
| Phvul.003G222600 | Phvul.003G222600 |
| Phvul.003G223600 | Phvul.003G223600 |
| Phvul.003G232600 | Phvul.003G232600 |
| Phvul.003G241700 | Phvul.003G241700 |
| Phvul.003G241900 | Phvul.003G241900 |
| Phvul.003G288500 | Phvul.003G288500 |
| Phvul.003G292400 | Phvul.003G292400 |
| Phvul.004G031900 | Phvul.004G031900 |
| Phvul.004G068900 | Phvul.004G068900 |
| Phvul.004G069900 | Phvul.004G069900 |
| Phvul.004G081200 | Phvul.004G081200 |
| Phvul.004G092100 | Phvul.004G092100 |
| Phvul.004G122000 | Phvul.004G122000 |
| Phvul.004G157600 | Phvul.004G157600 |
| Phvul.004G169800 | Phvul.004G169800 |
| Phvul.005G074700 | Phvul.005G074700 |
| Phvul.005G105200 | Phvul.005G105200 |
| Phvul.005G111200 | Phvul.005G111200 |
| Phvul.005G126300 | Phvul.005G126300 |
| Phvul.005G126600 | Phvul.005G126600 |
| Phvul.005G138300 | Phvul.005G138300 |
| Phvul.005G170600 | Phvul.005G138300 |
| Phvul.005G180600 | Phvul.005G170600 |
| Phvul.005G183700 | Phvul.005G180600 |
| Phvul.006G047800 | Phvul.005G183700 |
| Phvul.006G080000 | Phvul.006G047800 |
| Phvul.006G106100 | Phvul.006G080000 |
| Phvul.006G110200 | Phvul.006G106100 |
| Phvul.006G114100 | Phvul.006G110200 |
| Phvul.006G163100 | Phvul.006G114100 |
| Phvul.006G173500 | Phvul.006G163100 |
| Phvul.006G179700 | Phvul.006G173500 |
| Phvul.006G179800 | Phvul.006G179700 |
| Phvul.006G183100 | Phvul.006G179800 |
| Phvul.006G183200 | Phvul.006G183100 |
| Phvul.007G002900 | Phvul.006G183200 |
| Phvul.007G027000 | Phvul.007G002900 |
| Phvul.007G066500 | Phvul.007G027000 |
| Phvul.007G082000 | Phvul.007G066500 |
| Phvul.007G086600 | Phvul.007G082000 |
| Phvul.007G102800 | Phvul.007G086600 |
| Phvul.007G119100 | Phvul.007G102800 |
| Phvul.007G121200 | Phvul.007G119100 |
| Phvul.007G127800 | Phvul.007G121200 |
| Phvul.007G127800 | Phvul.007G127800 |

|                  |                  |
|------------------|------------------|
| Phvul.007G128000 | Phvul.007G128000 |
| Phvul.007G128100 | Phvul.007G128100 |
| Phvul.007G135300 | Phvul.007G135300 |
| Phvul.007G135900 | Phvul.007G135900 |
| Phvul.007G193300 | Phvul.007G193300 |
| Phvul.007G193400 | Phvul.007G193400 |
| Phvul.007G193700 | Phvul.007G193700 |
| Phvul.007G193800 | Phvul.007G193800 |
| Phvul.007G193900 | Phvul.007G193900 |
| Phvul.007G217800 | Phvul.007G217800 |
| Phvul.007G222500 | Phvul.007G222500 |
| Phvul.007G222600 | Phvul.007G222600 |
| Phvul.007G240200 | Phvul.007G240200 |
| Phvul.007G241600 | Phvul.007G241600 |
| Phvul.007G241800 | Phvul.007G241800 |
| Phvul.007G255100 | Phvul.007G255100 |
| Phvul.007G272800 | Phvul.007G272800 |
| Phvul.007G272900 | Phvul.007G272900 |
| Phvul.007G273000 | Phvul.007G273000 |
| Phvul.008G019600 | Phvul.008G019600 |
| Phvul.008G039300 | Phvul.008G039300 |
| Phvul.008G043500 | Phvul.008G043500 |
| Phvul.008G046400 | Phvul.008G046400 |
| Phvul.008G046500 | Phvul.008G046500 |
| Phvul.008G052000 | Phvul.008G052000 |
| Phvul.008G092800 | Phvul.008G092800 |
| Phvul.008G098900 | Phvul.008G098900 |
| Phvul.008G131500 | Phvul.008G131500 |
| Phvul.008G141000 | Phvul.008G141000 |
| Phvul.008G159400 | Phvul.008G159400 |
| Phvul.008G165000 | Phvul.008G165000 |
| Phvul.008G172200 | Phvul.008G172200 |
| Phvul.008G185400 | Phvul.008G185400 |
| Phvul.008G214700 | Phvul.008G214700 |
| Phvul.008G220400 | Phvul.008G220400 |
| Phvul.008G222400 | Phvul.008G246000 |
| Phvul.008G246000 | Phvul.008G253600 |
| Phvul.008G253600 | Phvul.008G271100 |
| Phvul.008G271100 | Phvul.009G013200 |
| Phvul.009G013200 | Phvul.009G029600 |
| Phvul.009G029600 | Phvul.009G074300 |
| Phvul.009G074300 | Phvul.009G084400 |
| Phvul.009G084400 | Phvul.009G089300 |
| Phvul.009G089300 | Phvul.009G093600 |
| Phvul.009G093600 | Phvul.009G109600 |
| Phvul.009G109600 | Phvul.009G123300 |
| Phvul.009G123300 | Phvul.009G137000 |
| Phvul.009G137000 | Phvul.009G137900 |
| Phvul.009G137900 | Phvul.009G161000 |
| Phvul.009G161000 | Phvul.009G196900 |
| Phvul.009G196900 | Phvul.009G206500 |

|                  |                  |
|------------------|------------------|
| Phvul.009G206500 | Phvul.009G225000 |
| Phvul.009G225000 | Phvul.009G240800 |
| Phvul.009G240800 | Phvul.009G240900 |
| Phvul.009G240900 | Phvul.009G251600 |
| Phvul.009G251600 | Phvul.009G262200 |
| Phvul.009G262200 | Phvul.010G035200 |
| Phvul.010G035200 | Phvul.010G050500 |
| Phvul.010G050500 | Phvul.010G050600 |
| Phvul.010G050600 | Phvul.010G050700 |
| Phvul.010G050700 | Phvul.010G050800 |
| Phvul.010G050800 | Phvul.010G054000 |
| Phvul.010G054000 | Phvul.010G092300 |
| Phvul.010G092300 | Phvul.010G114900 |
| Phvul.010G114900 | Phvul.010G124700 |
| Phvul.010G124700 | Phvul.010G130200 |
| Phvul.010G130200 | Phvul.010G146600 |
| Phvul.010G146600 | Phvul.010G154900 |
| Phvul.010G154900 | Phvul.010G158700 |
| Phvul.010G158700 | Phvul.010G159500 |
| Phvul.010G159500 | Phvul.011G058000 |
| Phvul.011G058000 | Phvul.011G071100 |
| Phvul.011G071100 | Phvul.011G091400 |
| Phvul.011G091400 | Phvul.011G107800 |
| Phvul.011G107800 | Phvul.011G118600 |
| Phvul.011G118600 | Phvul.011G125200 |
| Phvul.011G125200 | Phvul.011G162900 |
| Phvul.011G162900 | Phvul.011G187400 |
| Phvul.011G187400 | Phvul.L006500    |
| Phvul.L006500    |                  |





Data Filename: PvAP2-ERF final aa seq V2.mas  
Data Title: fasta file  
Amino acid Frequencies  
Sites Used: All selected

**Table S4: Summary of AP2/ERF transcription factor gene family factors of plants**

| Species                     | Number of AP2/ERF | Genome size (Mb) | AP2/ERF/Mb |
|-----------------------------|-------------------|------------------|------------|
| <i>Arabidopsis thaliana</i> | 122               | 135              | 0,9037     |
| <i>Daucus carota</i>        | 267               | 480              | 0,5563     |
| <i>Brassica rapa</i>        | 248               | 507              | 0,4892     |
| <i>Populus trichocarpa</i>  | 200               | 423              | 0,4728     |
| <i>Salix arbutifolia</i>    | 173               | 425              | 0,4071     |
| <i>Brassica oleracea</i>    | 226               | 603              | 0,3748     |
| <i>Oryza sativa</i>         | 139               | 372              | 0,3737     |
| <i>Cucumis melo</i>         | 136               | 375              | 0,3627     |
| <i>Ricinus cummunis</i>     | 114               | 320              | 0,3563     |
| <i>Setaria italica</i>      | 171               | 515              | 0,3320     |
| <i>Phaseolus vulgaris</i>   | 180               | 587              | 0,3066     |
| <i>Eucalyptus grandis</i>   | 209               | 691              | 0,3025     |
| <i>Citrus sinensis</i>      | 108               | 380              | 0,2842     |
| <i>Cucumis sativus</i>      | 103               | 367              | 0,2807     |
| <i>Vitis vinifera</i>       | 132               | 487              | 0,2710     |
| <i>Malus domestica</i>      | 209               | 881              | 0,2372     |
| <i>Solanum tuberosum</i>    | 155               | 800              | 0,1938     |
| <i>Solanum lycopersicum</i> | 112               | 950              | 0,1179     |
| <i>Glycine max</i>          | 98                | 975              | 0,1005     |
| <i>Zea mays</i>             | 184               | 2067             | 0,0890     |
| <i>Phyllostachys edulis</i> | 116               | 2050             | 0,0566     |
| <i>Triticum aestivum</i>    | 117               | 17000            | 0,0069     |

**Table S5:** Tandem and segmental duplications of PvAP2-ERF proteins

| Gen ID      | Phytozome Identifier | Chromosome: Start - Finish | Gen ID 1     | Phytozome Identifier | Chromosome: Start - Finish | Identity | e-value   | Score |
|-------------|----------------------|----------------------------|--------------|----------------------|----------------------------|----------|-----------|-------|
| PvAP2-ERF1  | Phvul.001G010400     | Chr01:931454-932855        | PvAP2-ERF140 | Phvul.009G013200     | Chr09:2059353-2060102      | 72%      | 2,00E-71  | 211   |
| PvAP2-ERF2  | Phvul.001G023700     | Chr01:2101326-2102436      | PvAP2-ERF127 | Phvul.008G098900     | Chr08:10466381-10466854    | 70%      | 6,00E-66  | 190   |
| PvAP2-ERF3  | Phvul.001G031200     | Chr01:2907733-2912245      | PvAP2-ERF52  | Phvul.003G144500     | Chr03:34150168-34153951    | 81%      | 7,00E-121 | 394   |
| PvAP2-ERF3  | Phvul.001G031200     | Chr01:2907733-2912245      | PvAP2-ERF60  | Phvul.003G232600     | Chr03:45498765-45502904    | 89%      | 0,00E+00  | 640   |
| PvAP2-ERF3  | Phvul.001G031200     | Chr01:2907733-2912245      | PvAP2-ERF167 | Phvul.010G130200     | Chr10:40027019-40030846    | 78%      | 1,00E-145 | 483   |
| PvAP2-ERF4  | Phvul.001G044500     | Chr01:4680371-4681060      | PvAP2-ERF143 | Phvul.009G084400     | Chr09:13327339-13328429    | 70%      | 5,00E-48  | 149   |
| PvAP2-ERF6  | Phvul.001G073800     | Chr01:10050549-10051844    | PvAP2-ERF44  | Phvul.002G310200     | Chr02:47177131-47178333    | 72%      | 6,00E-62  | 185   |
| PvAP2-ERF6  | Phvul.001G073800     | Chr01:10050549-10051844    | PvAP2-ERF146 | Phvul.009G109600     | Chr09:16431520-16432907    | 72%      | 8,00E-76  | 219   |
| PvAP2-ERF6  | Phvul.001G073800     | Chr01:10050549-10051844    | PvAP2-ERF79  | Phvul.005G170600     | Chr05:39420680-39421777    | 70%      | 6,00E-61  | 196   |
| PvAP2-ERF10 | Phvul.001G131300     | Chr01:37223732-37227544    | PvAP2-ERF122 | Phvul.008G043500     | Chr08:3742495-3745281      | 73%      | 2,00E-68  | 213   |
| PvAP2-ERF11 | Phvul.001G136100     | Chr01:38195399-38196241    | PvAP2-ERF116 | Phvul.007G255100     | Chr07:49321858-49323149    | 80%      | 2,00E-137 | 382   |
| PvAP2-ERF19 | Phvul.001G160500     | Chr01:42037682-42038650    | PvAP2-ERF105 | Phvul.007G193300     | Chr07:43116184-43117296    | 74%      | 2,00E-74  | 218   |
| PvAP2-ERF22 | Phvul.001G251200     | Chr01:50886895-50888163    | PvAP2-ERF40  | Phvul.002G254500     | Chr02:42080727-42082576    | 71%      | 8,00E-84  | 246   |
| PvAP2-ERF22 | Phvul.001G251200     | Chr01:50886895-50888163    | PvAP2-ERF141 | Phvul.009G029600     | Chr09:6536069-6538397      | 72%      | 7,00E-76  | 227   |
| PvAP2-ERF23 | Phvul.002G009100     | Chr02:1058028-1061555      | PvAP2-ERF3   | Phvul.001G031200     | Chr01:2907733-2912245      | 78%      | 0         | 524   |
| PvAP2-ERF23 | Phvul.002G009100     | Chr02:1058028-1061555      | PvAP2-ERF60  | Phvul.003G232600     | Chr03:45498765-45502904    | 76%      | 0,00E+00  | 777   |
| PvAP2-ERF23 | Phvul.002G009100     | Chr02:1058028-1061555      | PvAP2-ERF142 | Phvul.009G074300     | Chr09:12286871-12290865    | 71%      | 3,00E-173 | 500   |
| PvAP2-ERF31 | Phvul.002G056800     | Chr02:5810982-5811876      | PvAP2-ERF58  | Phvul.003G222600     | Chr03:44044998-44045690    | 71%      | 1,00E-63  | 187   |
| PvAP2-ERF34 | Phvul.002G153900     | Chr02:29528341-29528991    | PvAP2-ERF57  | Phvul.003G212800     | Chr03:42804542-42805711    | 86%      | 1,00E-71  | 229   |
| PvAP2-ERF35 | Phvul.002G154000     | Chr02:29572213-29572719    | PvAP2-ERF56  | Phvul.003G212700     | Chr03:42784293-42784829    | 71%      | 2,00E-60  | 176   |
| PvAP2-ERF42 | Phvul.002G281300     | Chr02:44487105-44490185    | PvAP2-ERF150 | Phvul.009G161000     | Chr09:23312039-23314113    | 71%      | 2,00E-47  | 147   |
| PvAP2-ERF43 | Phvul.002G295700     | Chr02:45929067-45930538    | PvAP2-ERF36  | Phvul.002G162500     | Chr02:30433762-30435007    | 71%      | 6,00E-85  | 219   |
| PvAP2-ERF46 | Phvul.003G035500     | Chr03:3558866-3561380      | PvAP2-ERF94  | Phvul.007G027000     | Chr07:1987568-1990173      | 76%      | 9,00E-97  | 283   |
| PvAP2-ERF47 | Phvul.003G064800     | Chr03:9171392-9172486      | PvAP2-ERF33  | Phvul.002G149500     | Chr02:28972219-28973736    | 72%      | 1,00E-85  | 285   |
| PvAP2-ERF48 | Phvul.003G069000     | Chr03:10190940-10193616    | PvAP2-ERF81  | Phvul.005G183700     | Chr05:40443575-40446525    | 76%      | 3,00E-87  | 275   |
| PvAP2-ERF48 | Phvul.003G069000     | Chr03:10190940-10193616    | PvAP2-ERF122 | Phvul.008G043500     | Chr08:3742495-3745281      | 80%      | 2,00E-136 | 388   |
| PvAP2-ERF48 | Phvul.003G069000     | Chr03:10190940-10193616    | PvAP2-ERF152 | Phvul.009G206500     | Chr09:30520376-30524486    | 78%      | 2,00E-93  | 306   |
| PvAP2-ERF48 | Phvul.003G069000     | Chr03:10190940-10193616    | PvAP2-ERF179 | Phvul.011G187400     | Chr11:46403162-46408304    | 79%      | 2,00E-96  | 331   |
| PvAP2-ERF49 | Phvul.003G102500     | Chr03:25181566-25183062    | PvAP2-ERF87  | Phvul.006G163100     | Chr06:27418948-27419898    | 71%      | 3,00E-125 | 354   |
| PvAP2-ERF51 | Phvul.003G111800     | Chr03:28178527-28180564    | PvAP2-ERF98  | Phvul.007G102800     | Chr07:11606561-11608030    | 85%      | 4,00E-173 | 479   |
| PvAP2-ERF56 | Phvul.003G212700     | Chr03:42784293-42784829    | PvAP2-ERF35  | Phvul.002G154000     | Chr02:29572213-29572719    | 71%      | 2,00E-58  | 171   |
| PvAP2-ERF61 | Phvul.003G241700     | Chr03:46504117-46504556    | PvAP2-ERF24  | Phvul.002G016700     | Chr02:1837177-1838211      | 70%      | 6,00E-48  | 153   |
| PvAP2-ERF62 | Phvul.003G241900     | Chr03:46544077-46547812    | PvAP2-ERF25  | Phvul.002G016900     | Chr02:1860815-1864323      | 82%      | 0         | 757   |
| PvAP2-ERF62 | Phvul.003G241900     | Chr03:46544077-46547812    | PvAP2-ERF133 | Phvul.008G185400     | Chr08:48884848-48891709    | 77%      | 2,00E-133 | 312   |
| PvAP2-ERF67 | Phvul.004G069900     | Chr04:10524334-10526517    | PvAP2-ERF7   | Phvul.001G084000     | Chr01:14986698-14988815    | 72%      | 1,00E-53  | 166   |
| PvAP2-ERF68 | Phvul.004G081200     | Chr04:14013830-14015119    | PvAP2-ERF9   | Phvul.001G111800     | Chr01:30786425-30787261    | 76%      | 1,00E-53  | 303   |
| PvAP2-ERF70 | Phvul.004G122000     | Chr04:39326716-39327951    | PvAP2-ERF95  | Phvul.007G066500     | Chr07:5928454-5929059      | 73%      | 1,00E-77  | 223   |



|              |                  |                         |              |                  |                         |     |           |     |
|--------------|------------------|-------------------------|--------------|------------------|-------------------------|-----|-----------|-----|
| PvAP2-ERF70  | Phvul.004G122000 | Chr04:39326716-39327951 | PvAP2-ERF34  | Phvul.002G153900 | Chr02:29528341-29528991 | 72% | 1,00E-62  | 186 |
| PvAP2-ERF70  | Phvul.004G122000 | Chr04:39326716-39327951 | PvAP2-ERF57  | Phvul.003G212800 | Chr03:42804542-42805711 | 72% | 4,00E-61  | 184 |
| PvAP2-ERF72  | Phvul.004G169800 | Chr04:45126736-45127899 | PvAP2-ERF44  | Phvul.002G310200 | Chr02:47177131-47178333 | 71% | 8,00E-77  | 223 |
| PvAP2-ERF78  | Phvul.005G138300 | Chr05:36714215-36718541 | PvAP2-ERF20  | Phvul.001G174400 | Chr01:43723288-43726156 | 72% | 2,00E-126 | 367 |
| PvAP2-ERF78  | Phvul.005G138300 | Chr05:36714215-36718541 | PvAP2-ERF173 | Phvul.011G071100 | Chr11:6338128-6342324   | 78% | 0,00E+00  | 565 |
| PvAP2-ERF79  | Phvul.005G170600 | Chr05:39420680-39421777 | PvAP2-ERF168 | Phvul.010G146600 | Chr10:41789538-41790170 | 73% | 6,00E-67  | 196 |
| PvAP2-ERF83  | Phvul.006G080000 | Chr06:19885920-19886712 | PvAP2-ERF137 | Phvul.008G246000 | Chr08:56074147-56075959 | 70% | 6,00E-63  | 188 |
| PvAP2-ERF84  | Phvul.006G106100 | Chr06:22259920-22260531 | PvAP2-ERF99  | Phvul.007G121200 | Chr07:21423708-21424172 | 70% | 9,00E-56  | 164 |
| PvAP2-ERF87  | Phvul.006G163100 | Chr06:27418948-27419898 | PvAP2-ERF49  | Phvul.003G102500 | Chr03:25181566-25183062 | 74% | 1,00E-122 | 348 |
| PvAP2-ERF93  | Phvul.007G002900 | Chr07:201437-202399     | PvAP2-ERF51  | Phvul.003G111800 | Chr03:28178527-28180564 | 71% | 2,00E-54  | 172 |
| PvAP2-ERF94  | Phvul.007G027000 | Chr07:1987568-1990173   | PvAP2-ERF46  | Phvul.003G035500 | Chr03:3558866-3561380   | 73% | 9,00E-96  | 281 |
| PvAP2-ERF96  | Phvul.007G082000 | Chr07:8065792-8067856   | PvAP2-ERF69  | Phvul.004G092100 | Chr04:24438791-24441164 | 75% | 4,00E-56  | 208 |
| PvAP2-ERF104 | Phvul.007G135900 | Chr07:33583547-33584310 | PvAP2-ERF115 | Phvul.007G241800 | Chr07:48154568-48155203 | 70% | 5,00E-78  | 224 |
| PvAP2-ERF109 | Phvul.007G193900 | Chr07:43237645-43238058 | PvAP2-ERF154 | Phvul.009G240800 | Chr09:35418233-35418610 | 70% | 1,00E-45  | 134 |
| PvAP2-ERF110 | Phvul.007G217800 | Chr07:45677796-45679996 | PvAP2-ERF157 | Phvul.009G262200 | Chr09:37365318-37367770 | 70% | 4,00E-53  | 167 |
| PvAP2-ERF111 | Phvul.007G222500 | Chr07:46214380-46215168 | PvAP2-ERF174 | Phvul.011G091400 | Chr11:9148323-9148991   | 70% | 1,00E-55  | 166 |
| PvAP2-ERF112 | Phvul.007G222600 | Chr07:46221519-46222906 | PvAP2-ERF21  | Phvul.001G187100 | Chr01:45289609-45290175 | 72% | 6,00E-75  | 215 |
| PvAP2-ERF113 | Phvul.007G240200 | Chr07:48016768-48020784 | PvAP2-ERF20  | Phvul.001G174400 | Chr01:43723288-43726156 | 71% | 5,00E-57  | 237 |
| PvAP2-ERF116 | Phvul.007G255100 | Chr07:49321858-49323149 | PvAP2-ERF11  | Phvul.001G136100 | Chr01:38195399-38196241 | 78% | 2,00E-137 | 382 |
| PvAP2-ERF119 | Phvul.007G273000 | Chr07:51127595-51128470 | PvAP2-ERF84  | Phvul.006G106100 | Chr06:22259920-22260531 | 71% | 1,00E-57  | 171 |
| PvAP2-ERF121 | Phvul.008G039300 | Chr08:3311273-3312478   | PvAP2-ERF65  | Phvul.004G031900 | Chr04:3566458-3567993   | 76% | 5,00E-163 | 471 |
| PvAP2-ERF121 | Phvul.008G039300 | Chr08:3311273-3312478   | PvAP2-ERF38  | Phvul.002G168900 | Chr02:31177497-31178525 | 73% | 2,00E-56  | 179 |
| PvAP2-ERF125 | Phvul.008G052000 | Chr08:4601738-4606123   | PvAP2-ERF3   | Phvul.001G031200 | Chr01:2907733-2912245   | 71% | 1,00E-120 | 368 |
| PvAP2-ERF125 | Phvul.008G052000 | Chr08:4601738-4606123   | PvAP2-ERF52  | Phvul.003G144500 | Chr03:34150168-34153951 | 81% | 4,00E-127 | 379 |
| PvAP2-ERF125 | Phvul.008G052000 | Chr08:4601738-4606123   | PvAP2-ERF142 | Phvul.009G074300 | Chr09:12286871-12290865 | 70% | 4,00E-117 | 422 |
| PvAP2-ERF125 | Phvul.008G052000 | Chr08:4601738-4606123   | PvAP2-ERF172 | Phvul.011G058000 | Chr11:5016893-5020109   | 72% | 2,00E-135 | 402 |
| PvAP2-ERF129 | Phvul.008G141000 | Chr08:23916631-23917738 | PvAP2-ERF163 | Phvul.010G054000 | Chr10:8503366-8504597   | 73% | 3,00E-94  | 272 |
| PvAP2-ERF129 | Phvul.008G141000 | Chr08:23916631-23917738 | PvAP2-ERF58  | Phvul.003G222600 | Chr03:44044998-44045690 | 70% | 4,00E-58  | 177 |
| PvAP2-ERF131 | Phvul.008G165000 | Chr08:42621369-42622218 | PvAP2-ERF147 | Phvul.009G123300 | Chr09:18302891-18303953 | 78% | 2,00E-88  | 258 |
| PvAP2-ERF132 | Phvul.008G172200 | Chr08:45116054-45117855 | PvAP2-ERF141 | Phvul.009G029600 | Chr09:6536069-6538397   | 70% | 1,00E-117 | 335 |
| PvAP2-ERF132 | Phvul.008G172200 | Chr08:45116054-45117855 | PvAP2-ERF22  | Phvul.001G251200 | Chr01:50886895-50888163 | 72% | 6,00E-69  | 208 |
| PvAP2-ERF138 | Phvul.008G253600 | Chr08:56759415-56762319 | PvAP2-ERF53  | Phvul.003G153100 | Chr03:35757558-35760426 | 74% | 1,00E-123 | 350 |
| PvAP2-ERF138 | Phvul.008G253600 | Chr08:56759415-56762319 | PvAP2-ERF81  | Phvul.005G183700 | Chr05:40443575-40446525 | 73% | 9,00E-120 | 338 |
| PvAP2-ERF138 | Phvul.008G253600 | Chr08:56759415-56762319 | PvAP2-ERF152 | Phvul.009G206500 | Chr09:30520376-30524486 | 70% | 5,00E-128 | 361 |
| PvAP2-ERF138 | Phvul.008G253600 | Chr08:56759415-56762319 | PvAP2-ERF179 | Phvul.011G187400 | Chr11:46403162-46408304 | 70% | 1,00E-106 | 308 |
| PvAP2-ERF141 | Phvul.009G029600 | Chr09:6536069-6538397   | PvAP2-ERF132 | Phvul.008G172200 | Chr08:45116054-45117855 | 74% | 5,00E-113 | 323 |
| PvAP2-ERF141 | Phvul.009G029600 | Chr09:6536069-6538397   | PvAP2-ERF22  | Phvul.001G251200 | Chr01:50886895-50888163 | 70% | 8,00E-78  | 232 |
| PvAP2-ERF142 | Phvul.009G074300 | Chr09:12286871-12290865 | PvAP2-ERF3   | Phvul.001G031200 | Chr01:2907733-2912245   | 76% | 0         | 898 |
| PvAP2-ERF142 | Phvul.009G074300 | Chr09:12286871-12290865 | PvAP2-ERF23  | Phvul.002G009100 | Chr02:1058028-1061555   | 70% | 2,00E-171 | 495 |
| PvAP2-ERF142 | Phvul.009G074300 | Chr09:12286871-12290865 | PvAP2-ERF60  | Phvul.003G232600 | Chr03:45498765-45502904 | 75% | 0         | 620 |

|              |                  |                         |              |                  |                         |     |           |     |
|--------------|------------------|-------------------------|--------------|------------------|-------------------------|-----|-----------|-----|
| PvAP2-ERF142 | Phvul.009G074300 | Chr09:12286871-12290865 | PvAP2-ERF167 | Phvul.010G130200 | Chr10:40027019-40030846 | 81% | 2,00E-141 | 469 |
| PvAP2-ERF142 | Phvul.009G074300 | Chr09:12286871-12290865 | PvAP2-ERF172 | Phvul.011G058000 | Chr11:5016893-5020109   | 71% | 4,00E-118 | 435 |
| PvAP2-ERF146 | Phvul.009G109600 | Chr09:16431520-16432907 | PvAP2-ERF6   | Phvul.001G073800 | Chr01:10050549-10051844 | 75% | 2,00E-74  | 215 |
| PvAP2-ERF146 | Phvul.009G109600 | Chr09:16431520-16432907 | PvAP2-ERF79  | Phvul.005G170600 | Chr05:39420680-39421777 | 72% | 1,00E-65  | 191 |
| PvAP2-ERF148 | Phvul.009G137000 | Chr09:20103112-20105454 | PvAP2-ERF130 | Phvul.008G159400 | Chr08:40680584-40682430 | 75% | 1,00E-86  | 255 |
| PvAP2-ERF148 | Phvul.009G137000 | Chr09:20103112-20105454 | PvAP2-ERF43  | Phvul.002G295700 | Chr02:45929067-45930538 | 70% | 5,00E-57  | 178 |
| PvAP2-ERF160 | Phvul.010G050600 | Chr10:8042080-8042795   | PvAP2-ERF125 | Phvul.008G046400 | Chr08:4004959-4005582   | 71% | 2,00E-52  | 158 |
| PvAP2-ERF164 | Phvul.010G092300 | Chr10:34005917-34007381 | PvAP2-ERF76  | Phvul.005G126300 | Chr05:35040940-35041680 | 74% | 2,00E-82  | 237 |
| PvAP2-ERF164 | Phvul.010G092300 | Chr10:34005917-34007381 | PvAP2-ERF77  | Phvul.005G126600 | Chr05:35099239-35100039 | 71% | 9,00E-72  | 209 |
| PvAP2-ERF165 | Phvul.010G114900 | Chr10:38090570-38091511 | PvAP2-ERF86  | Phvul.006G114100 | Chr06:22942518-22943272 | 71% | 2,00E-64  | 181 |
| PvAP2-ERF166 | Phvul.010G124700 | Chr10:39467544-39470639 | PvAP2-ERF157 | Phvul.009G262200 | Chr09:37365318-37367770 | 80% | 5,00E-154 | 431 |
| PvAP2-ERF167 | Phvul.010G130200 | Chr10:40027019-40030846 | PvAP2-ERF23  | Phvul.002G009100 | Chr02:1058028-1061555   | 75% | 2,00E-129 | 384 |
| PvAP2-ERF167 | Phvul.010G130200 | Chr10:40027019-40030846 | PvAP2-ERF51  | Phvul.003G144500 | Chr03:34150168-34153951 | 76% | 3,00E-124 | 440 |
| PvAP2-ERF167 | Phvul.010G130200 | Chr10:40027019-40030846 | PvAP2-ERF60  | Phvul.003G232600 | Chr03:45498765-45502904 | 81% | 1,00E-129 | 469 |
| PvAP2-ERF167 | Phvul.010G130200 | Chr10:40027019-40030846 | PvAP2-ERF125 | Phvul.008G052000 | Chr08:4601738-4606123   | 81% | 1,00E-123 | 461 |
| PvAP2-ERF167 | Phvul.010G130200 | Chr10:40027019-40030846 | PvAP2-ERF172 | Phvul.011G058000 | Chr11:5016893-5020109   | 80% | 7,00E-125 | 409 |
| PvAP2-ERF168 | Phvul.010G146600 | Chr10:41789538-41790170 | PvAP2-ERF79  | Phvul.005G170600 | Chr05:39420680-39421777 | 76% | 5,00E-75  | 216 |
| PvAP2-ERF168 | Phvul.010G146600 | Chr10:41789538-41790170 | PvAP2-ERF6   | Phvul.001G073800 | Chr01:10050549-10051844 | 74% | 2,00E-60  | 211 |
| PvAP2-ERF173 | Phvul.011G071100 | Chr11:6338128-6342324   | PvAP2-ERF20  | Phvul.001G174400 | Chr01:43723288-43726156 | 71% | 4,00E-113 | 333 |
| PvAP2-ERF173 | Phvul.011G071100 | Chr11:6338128-6342324   | PvAP2-ERF25  | Phvul.002G016900 | Chr02:1860815-1864323   | 76% | 8,00E-103 | 309 |
| PvAP2-ERF173 | Phvul.011G071100 | Chr11:6338128-6342324   | PvAP2-ERF62  | Phvul.003G241900 | Chr03:46544077-46547812 | 78% | 3,00E-103 | 329 |
| PvAP2-ERF173 | Phvul.011G071100 | Chr11:6338128-6342324   | PvAP2-ERF78  | Phvul.005G138300 | Chr05:36714215-36718541 | 79% | 0,00E+00  | 599 |
| PvAP2-ERF174 | Phvul.011G091400 | Chr11:9148323-9148991   | PvAP2-ERF76  | Phvul.005G126300 | Chr05:35040940-35041680 | 76% | 2,00E-82  | 237 |
| PvAP2-ERF174 | Phvul.011G091400 | Chr11:9148323-9148991   | PvAP2-ERF77  | Phvul.005G126600 | Chr05:35099239-35100039 | 71% | 9,00E-72  | 209 |
| PvAP2-ERF175 | Phvul.011G107800 | Chr11:12892620-12894683 | PvAP2-ERF75  | Phvul.005G111200 | Chr05:32566424-32568115 | 72% | 1,00E-79  | 227 |
| PvAP2-ERF176 | Phvul.011G118600 | Chr11:19321983-19324035 | PvAP2-ERF74  | Phvul.005G105200 | Chr05:31203406-31204629 | 80% | 3,00E-125 | 378 |

| Gen ID       | Phytozome Identifier | Chromosome: Start - Finish | Gen ID       | Phytozome Identifier | Chromosome: Start - Finish | Identity | e-value   | Score |
|--------------|----------------------|----------------------------|--------------|----------------------|----------------------------|----------|-----------|-------|
| PvAP2-ERF19  | Phvul.001G160500     | Chr01:42037682-42038650    | PvAP2-ERF16  | Phvul.001G160200     | Chr01:41973984-41974619    | 73%      | 1,00E-60  | 180   |
| PvAP2-ERF27  | Phvul.002G035900     | Chr02:3545434-3545982      | PvAP2-ERF28  | Phvul.002G036000     | Chr02:3561530-3562521      | 71%      | 5,00E-58  | 174   |
| PvAP2-ERF36  | Phvul.002G162500     | Chr02:30433762-30435007    | PvAP2-ERF43  | Phvul.002G295700     | Chr02:45929067-45930538    | 70%      | 5,00E-84  | 247   |
| PvAP2-ERF48  | Phvul.003G069000     | Chr03:10190940-10193616    | PvAP2-ERF49  | Phvul.003G102500     | Chr03:25181566-25183062    | 81%      | 2,00E-92  | 347   |
| PvAP2-ERF48  | Phvul.003G069000     | Chr03:10190940-10193616    | PvAP2-ERF52  | Phvul.003G144500     | Chr03:34150168-34153951    | 78%      | 1,00E-81  | 351   |
| PvAP2-ERF48  | Phvul.003G069000     | Chr03:10190940-10193616    | PvAP2-ERF53  | Phvul.003G153100     | Chr03:35757558-35760426    | 82%      | 4,00E-96  | 318   |
| PvAP2-ERF84  | Phvul.006G106100     | Chr06:22259920-22260531    | PvAP2-ERF90  | Phvul.006G179800     | Chr06:28956271-28957252    | 70%      | 2,00E-47  | 159   |
| PvAP2-ERF100 | Phvul.007G127800     | Chr07:27274067-27275018    | PvAP2-ERF119 | Phvul.007G273000     | Chr07:51127595-51128470    | 72%      | 4,00E-66  | 194   |
| PvAP2-ERF101 | Phvul.007G128000     | Chr07:27559597-27560279    | PvAP2-ERF118 | Phvul.007G272900     | Chr07:51111180-51111614    | 72%      | 1,00E-48  | 143   |
| PvAP2-ERF107 | Phvul.007G193700     | Chr07:43194246-43194881    | PvAP2-ERF108 | Phvul.007G193800     | Chr07:43227132-43227770    | 73%      | 4,00E-102 | 285   |
| PvAP2-ERF117 | Phvul.007G272800     | Chr07:51105207-51105858    | PvAP2-ERF102 | Phvul.007G128100     | Chr07:27720034-27720477    | 70%      | 9,00E-46  | 136   |
| PvAP2-ERF135 | Phvul.008G220400     | Chr08:53286141-53288298    | PvAP2-ERF126 | Phvul.008G092800     | Chr08:9500856-9502893      | 72%      | 2,00E-51  | 218   |
| PvAP2-ERF153 | Phvul.009G225000     | Chr09:33327983-33329052    | PvAP2-ERF143 | Phvul.009G084400     | Chr09:13327339-13328429    | 71%      | 6,00E-42  | 150   |
| PvAP2-ERF154 | Phvul.009G240800     | Chr09:35418233-35418610    | PvAP2-ERF155 | Phvul.009G240900     | Chr09:35430515-35430877    | 70%      | 7,00E-52  | 154   |

**Table S6:** miRNA targets identified by psRNATarget

| Acacia auriculiformis |              |             |        |             |           |              |            |                         |                         |             |              |              |
|-----------------------|--------------|-------------|--------|-------------|-----------|--------------|------------|-------------------------|-------------------------|-------------|--------------|--------------|
| miRNA_Acc.            | Target_Acc.  | Expectation | UPE    | miRNA_start | miRNA_end | Target_start | Target_end | miRNA_aligned_fragment  | Target_aligned_fragment | Inhibition  | Target_Desc. | Multiplicity |
| aau-miR172            | PvAP2-ERF173 | 0,5         | 11,541 | 1           | 22        | 3656         | 3677       | UGAGAAUUCUUGAUGAUGCUGCA | UGCAGCAUCAUCAGGAUUCUCA  | Cleavage    |              | 1            |
| aau-miR172            | PvAP2-ERF78  | 0,5         | 5,882  | 1           | 22        | 3797         | 3818       | UGAGAAUUCUUGAUGAUGCUGCA | UGCAGCAUCAUCAGGAUUCUCA  | Cleavage    |              | 1            |
| aau-miR172            | PvAP2-ERF25  | 2           | 16,394 | 1           | 22        | 3064         | 3085       | UGAGAAUUCUUGAUGAUGCUGCA | UGCAGCAUCAUCAGGAUUCUCA  | Cleavage    |              | 1            |
| aau-miR172            | PvAP2-ERF62  | 2           | 18,825 | 1           | 22        | 3200         | 3221       | UGAGAAUUCUUGAUGAUGCUGCA | UGCAGCAUCAUCAGGAUUCUCA  | Cleavage    |              | 1            |
| aau-miR172            | PvAP2-ERF20  | 3           | 9,676  | 1           | 22        | 2530         | 2551       | UGAGAAUUCUUGAUGAUGCUGCA | UGCAGCAUCAUCAGGAUUCUCA  | Cleavage    |              | 1            |
| Arachis hypogaea      |              |             |        |             |           |              |            |                         |                         |             |              |              |
| miRNA_Acc.            | Target_Acc.  | Expectation | UPE    | miRNA_start | miRNA_end | Target_start | Target_end | miRNA_aligned_fragment  | Target_aligned_fragment | Inhibition  | Target_Desc. | Multiplicity |
| ahy-miR3509-5p        | PvAP2-ERF142 | 3           | 19,028 | 1           | 22        | 2269         | 2290       | AUACUUGAGAGCCGUUAGAUGA  | UGAUCUCGCGGCCUUAAGUAC   | Cleavage    |              | 1            |
| ahy-miR3509-5p        | PvAP2-ERF60  | 3           | 18,728 | 1           | 22        | 2310         | 2331       | AUACUUGAGAGCCGUUAGAUGA  | UGAUCUGGCCGCACUCAAGUUAU | Translation |              | 1            |
| Arabidopsis lyrata    |              |             |        |             |           |              |            |                         |                         |             |              |              |
| miRNA_Acc.            | Target_Acc.  | Expectation | UPE    | miRNA_start | miRNA_end | Target_start | Target_end | miRNA_aligned_fragment  | Target_aligned_fragment | Inhibition  | Target_Desc. | Multiplicity |
| aly-miR156a-3p        | PVERF3       | 3           | 23,803 | 1           | 21        | 2744         | 2764       | GCUCACUGCUCUUCUGUCAG    | UUUGCAGAAAGAGUAGUGGGU   | Cleavage    |              | 1            |
| aly-miR172a-3p        | PvAP2-ERF78  | 0,5         | 10,114 | 1           | 20        | 3797         | 3816       | AGAAUCUUGAUGAUGCUGCA    | UGCAGCAUCAUCAGGAUUCU    | Cleavage    |              | 1            |
| aly-miR172a-3p        | PvAP2-ERF173 | 0,5         | 11,33  | 1           | 20        | 3656         | 3675       | AGAAUCUUGAUGAUGCUGCA    | UGCAGCAUCAUCAGGAUUCU    | Cleavage    |              | 1            |
| aly-miR172a-3p        | PvAP2-ERF62  | 1,5         | 16,463 | 1           | 20        | 3200         | 3219       | AGAAUCUUGAUGAUGCUGCA    | UGCAGCAUCAUCAGGAUUCU    | Cleavage    |              | 1            |
| aly-miR172a-3p        | PvAP2-ERF25  | 1,5         | 16,15  | 1           | 20        | 3064         | 3083       | AGAAUCUUGAUGAUGCUGCA    | UGCAGCAUCAUCAGGAUUCU    | Cleavage    |              | 1            |
| aly-miR172a-3p        | PvAP2-ERF20  | 1,5         | 9,626  | 1           | 20        | 2530         | 2549       | AGAAUCUUGAUGAUGCUGCA    | UGCAGCAUCAUCAGGAUUCU    | Cleavage    |              | 1            |
| aly-miR172a-3p        | PvAP2-ERF113 | 2,5         | 22,52  | 1           | 20        | 3572         | 3591       | AGAAUCUUGAUGAUGCUGCA    | AGCAGCAUCAUCAGGAUUCU    | Cleavage    |              | 1            |
| aly-miR172b-3p        | PvAP2-ERF173 | 0,5         | 11,33  | 1           | 20        | 3656         | 3675       | AGAAUCUUGAUGAUGCUGCA    | UGCAGCAUCAUCAGGAUUCU    | Cleavage    |              | 1            |
| aly-miR172b-3p        | PvAP2-ERF78  | 0,5         | 10,114 | 1           | 20        | 3797         | 3816       | AGAAUCUUGAUGAUGCUGCA    | UGCAGCAUCAUCAGGAUUCU    | Cleavage    |              | 1            |
| aly-miR172b-3p        | PvAP2-ERF20  | 1,5         | 9,626  | 1           | 20        | 2530         | 2549       | AGAAUCUUGAUGAUGCUGCA    | UGCAGCAUCAUCAGGAUUCU    | Cleavage    |              | 1            |
| aly-miR172b-3p        | PvAP2-ERF25  | 1,5         | 16,15  | 1           | 20        | 3064         | 3083       | AGAAUCUUGAUGAUGCUGCA    | UGCAGCAUCAUCAGGAUUCU    | Cleavage    |              | 1            |
| aly-miR172b-3p        | PvAP2-ERF62  | 1,5         | 16,463 | 1           | 20        | 3200         | 3219       | AGAAUCUUGAUGAUGCUGCA    | UGCAGCAUCAUCAGGAUUCU    | Cleavage    |              | 1            |
| aly-miR172b-3p        | PvAP2-ERF113 | 2,5         | 22,52  | 1           | 20        | 3572         | 3591       | AGAAUCUUGAUGAUGCUGCA    | AGCAGCAUCAUCAGGAUUCU    | Cleavage    |              | 1            |
| aly-miR172c-3p        | PvAP2-ERF173 | 0,5         | 11,33  | 1           | 21        | 3655         | 3675       | AGAAUCUUGAUGAUGCUGCAG   | CUGCAGCAUCAUCAGGAUUCU   | Cleavage    |              | 1            |
| aly-miR172c-3p        | PvAP2-ERF78  | 0,5         | 10,114 | 1           | 21        | 3796         | 3816       | AGAAUCUUGAUGAUGCUGCAG   | CUGCAGCAUCAUCAGGAUUCU   | Cleavage    |              | 1            |
| aly-miR172c-3p        | PvAP2-ERF20  | 1,5         | 9,626  | 1           | 21        | 2529         | 2549       | AGAAUCUUGAUGAUGCUGCAG   | CUGCAGCAUCAUCAGGAUUCU   | Cleavage    |              | 1            |
| aly-miR172c-3p        | PvAP2-ERF25  | 1,5         | 16,15  | 1           | 21        | 3063         | 3083       | AGAAUCUUGAUGAUGCUGCAG   | CUGCAGCAUCAUCAGGAUUCU   | Cleavage    |              | 1            |
| aly-miR172c-3p        | PvAP2-ERF62  | 1,5         | 16,463 | 1           | 21        | 3199         | 3219       | AGAAUCUUGAUGAUGCUGCAG   | CUGCAGCAUCAUCAGGAUUCU   | Cleavage    |              | 1            |
| aly-miR172c-3p        | PvAP2-ERF113 | 2,5         | 22,52  | 1           | 21        | 3571         | 3591       | AGAAUCUUGAUGAUGCUGCAG   | CAGCAGCAUCAUCAGGAUUCU   | Cleavage    |              | 1            |
| aly-miR172d-3p        | PvAP2-ERF173 | 0,5         | 11,33  | 1           | 21        | 3655         | 3675       | AGAAUCUUGAUGAUGCUGCAG   | CUGCAGCAUCAUCAGGAUUCU   | Cleavage    |              | 1            |
| aly-miR172d-3p        | PvAP2-ERF78  | 0,5         | 10,114 | 1           | 21        | 3796         | 3816       | AGAAUCUUGAUGAUGCUGCAG   | CUGCAGCAUCAUCAGGAUUCU   | Cleavage    |              | 1            |
| aly-miR172d-3p        | PvAP2-ERF20  | 1,5         | 9,626  | 1           | 21        | 2529         | 2549       | AGAAUCUUGAUGAUGCUGCAG   | CUGCAGCAUCAUCAGGAUUCU   | Cleavage    |              | 1            |
| aly-miR172d-3p        | PvAP2-ERF25  | 1,5         | 16,15  | 1           | 21        | 3063         | 3083       | AGAAUCUUGAUGAUGCUGCAG   | CUGCAGCAUCAUCAGGAUUCU   | Cleavage    |              | 1            |
| aly-miR172d-3p        | PvAP2-ERF62  | 1,5         | 16,463 | 1           | 21        | 3199         | 3219       | AGAAUCUUGAUGAUGCUGCAG   | CUGCAGCAUCAUCAGGAUUCU   | Cleavage    |              | 1            |
| aly-miR172d-3p        | PvAP2-ERF113 | 2,5         | 22,52  | 1           | 21        | 3571         | 3591       | AGAAUCUUGAUGAUGCUGCAG   | CAGCAGCAUCAUCAGGAUUCU   | Cleavage    |              | 1            |
| aly-miR172e-3p        | PvAP2-ERF20  | 1,5         | 9,823  | 1           | 20        | 2529         | 2548       | GAAUCUUGAUGAUGCUGCAU    | CUGCAGCAUCAUCAGGAUUC    | Cleavage    |              | 1            |
| aly-miR172e-3p        | PvAP2-ERF25  | 1,5         | 15,486 | 1           | 20        | 3063         | 3082       | GAAUCUUGAUGAUGCUGCAU    | CUGCAGCAUCAUCAGGAUUC    | Cleavage    |              | 1            |
| aly-miR172e-3p        | PvAP2-ERF62  | 1,5         | 15,901 | 1           | 20        | 3199         | 3218       | GAAUCUUGAUGAUGCUGCAU    | CUGCAGCAUCAUCAGGAUUC    | Cleavage    |              | 1            |
| aly-miR172e-3p        | PvAP2-ERF173 | 1,5         | 11,994 | 1           | 20        | 3655         | 3674       | GAAUCUUGAUGAUGCUGCAU    | CUGCAGCAUCAUCAGGAUUC    | Cleavage    |              | 1            |
| aly-miR172e-3p        | PvAP2-ERF78  | 1,5         | 10,7   | 1           | 20        | 3796         | 3815       | GAAUCUUGAUGAUGCUGCAU    | CUGCAGCAUCAUCAGGAUUC    | Cleavage    |              | 1            |
| aly-miR172e-3p        | PvAP2-ERF113 | 2,5         | 20,798 | 1           | 20        | 3571         | 3590       | GAAUCUUGAUGAUGCUGCAU    | CAGCAGCAUCAUCAGGAUUC    | Cleavage    |              | 1            |
| aly-miR172f-3p        | PvAP2-ERF173 | 0,5         | 11,33  | 1           | 21        | 3655         | 3675       | AGAAUCUUGAUGAUGCUGCAG   | CUGCAGCAUCAUCAGGAUUCU   | Cleavage    |              | 1            |
| aly-miR172f-3p        | PvAP2-ERF78  | 0,5         | 10,114 | 1           | 21        | 3796         | 3816       | AGAAUCUUGAUGAUGCUGCAG   | CUGCAGCAUCAUCAGGAUUCU   | Cleavage    |              | 1            |
| aly-miR172f-3p        | PvAP2-ERF20  | 1,5         | 9,626  | 1           | 21        | 2529         | 2549       | AGAAUCUUGAUGAUGCUGCAG   | CUGCAGCAUCAUCAGGAUUCU   | Cleavage    |              | 1            |
| aly-miR172f-3p        | PvAP2-ERF25  | 1,5         | 16,15  | 1           | 21        | 3063         | 3083       | AGAAUCUUGAUGAUGCUGCAG   | CUGCAGCAUCAUCAGGAUUCU   | Cleavage    |              | 1            |
| aly-miR172f-3p        | PvAP2-ERF62  | 1,5         | 16,463 | 1           | 21        | 3199         | 3219       | AGAAUCUUGAUGAUGCUGCAG   | CUGCAGCAUCAUCAGGAUUCU   | Cleavage    |              | 1            |
| aly-miR172f-3p        | PvAP2-ERF113 | 2,5         | 22,52  | 1           | 21        | 3571         | 3591       | AGAAUCUUGAUGAUGCUGCAG   | CAGCAGCAUCAUCAGGAUUCU   | Cleavage    |              | 1            |
| aly-miR3445-5p.1      | PvAP2-ERF26  | 3           | 17,388 | 1           | 21        | 439          | 459        | CGAACCAUACCCUCCAAACC    | GGUUUGGAGGGUGAUGAUUCU   | Cleavage    |              | 1            |
| aly-miR4246           | PvAP2-ERF30  | 2,5         | 16,965 | 1           | 21        | 1308         | 1328       | AAAUCCAAUUUCAUUGCUUA    | UAAGCAUUGGAUUGAUUG      | Translation |              | 1            |

|               |              |     |        |   |    |      |      |                       |                        |             |   |
|---------------|--------------|-----|--------|---|----|------|------|-----------------------|------------------------|-------------|---|
| aly-miR831-5p | PvAP2-ERF139 | 2,5 | 11,62  | 1 | 21 | 76   | 96   | AGAAGAGGUACAAGGAGAUGA | UCAUCAUUUUAUACCUUCUUCU | Translation | 1 |
| aly-miR835-3p | PvAP2-ERF175 | 3   | 13,467 | 1 | 20 | 1783 | 1802 | UGAAGAAGAUACGCAAGAAA  | UUUCUUGCGUGUCUGUUUUUA  | Cleavage    | 1 |
| aly-miR837-5p | PvAP2-ERF148 | 1,5 | 13,354 | 1 | 21 | 2261 | 2281 | CAUUGUUUCUUGUUUUUUUUA | UGAAAGAAACAAAAACA AUG  | Translation | 1 |
| aly-miR838-3p | PvAP2-ERF84  | 1   | 12,97  | 1 | 21 | 486  | 506  | UUUUCUUCUUCUUCUUGCACA | UGUGCAGGAAGAAGAAGAAGA  | Cleavage    | 1 |
| aly-miR838-3p | PvAP2-ERF156 | 2   | 21,194 | 1 | 20 | 1199 | 1218 | UUUUCUUCUUCUUCUUGCAC  | AUGUGAGAAGAAGAAGAAAA   | Cleavage    | 1 |
| aly-miR838-3p | PvAP2-ERF133 | 2,5 | 22,104 | 1 | 21 | 507  | 527  | UUUUCUUCUUCUUCUUGCACA | UGUGGGAGAAGAAGAAGAAAA  | Translation | 1 |
| aly-miR838-3p | PvAP2-ERF42  | 2,5 | 22,525 | 1 | 21 | 440  | 460  | UUUUCUUCUUCUUCUUGCACA | UUUGGAAGAAGAAGAAGAAGA  | Cleavage    | 1 |
| aly-miR838-3p | PvAP2-ERF24  | 2   | 9,672  | 1 | 20 | 209  | 228  | UUUUCUUCUUCUUCUUGCAC  | GUGAAGGAAGAAGAAGAGAA   | Cleavage    | 1 |
| aly-miR838-3p | PvAP2-ERF67  | 2,5 | 7,016  | 1 | 20 | 267  | 286  | UUUUCUUCUUCUUCUUGCAC  | GUAGAAGAAGAAGAAGAAGA   | Cleavage    | 1 |
| aly-miR838-3p | PvAP2-ERF51  | 2,5 | 4,646  | 1 | 20 | 1498 | 1517 | UUUUCUUCUUCUUCUUGCAC  | GGGGGAGAAGAAGAAGAAAA   | Cleavage    | 1 |
| aly-miR838-3p | PvAP2-ERF144 | 3   | 18,622 | 1 | 20 | 939  | 958  | UUUUCUUCUUCUUCUUGCAC  | GAGCAAGAAGUAGAGGAGAA   | Translation | 1 |
| aly-miR846-5p | PvAP2-ERF106 | 3   | 21,02  | 1 | 21 | 372  | 392  | UUCAGGGACUCAAUUCAGAA  | UUUUGAGUUGGAGUUUCUUGA  | Cleavage    | 1 |
| aly-miR851-3p | PvAP2-ERF138 | 3   | 14,872 | 1 | 22 | 222  | 243  | UGUGGGUGGCAACCAAGACGA | UUGUUUUUGUUUGUCAUCUACU | Cleavage    | 1 |

#### Amphimedon queenslandica

| miRNA_Acc.  | Target_Acc.  | Expectation | UPE    | miRNA_start | miRNA_end | Target_start | Target_end | miRNA_aligned_fragment | Target_aligned_fragment | Inhibition  | Target_Desc. | Multiplicity |
|-------------|--------------|-------------|--------|-------------|-----------|--------------|------------|------------------------|-------------------------|-------------|--------------|--------------|
| aqc-miR172a | PvAP2-ERF78  | 0,5         | 10,114 | 1           | 20        | 3797         | 3816       | AGAUCUUGAUGAUGCUGCA    | UGCAGCAUCAUCAGGAUUUCU   | Cleavage    |              | 1            |
| aqc-miR172a | PvAP2-ERF173 | 0,5         | 11,33  | 1           | 20        | 3656         | 3675       | AGAUCUUGAUGAUGCUGCA    | UGCAGCAUCAUCAGGAUUUCU   | Cleavage    |              | 1            |
| aqc-miR172a | PvAP2-ERF62  | 1,5         | 16,463 | 1           | 20        | 3200         | 3219       | AGAUCUUGAUGAUGCUGCA    | UGCAGCAUCAUCAGGAUUCU    | Cleavage    |              | 1            |
| aqc-miR172a | PvAP2-ERF25  | 1,5         | 16,15  | 1           | 20        | 3064         | 3083       | AGAUCUUGAUGAUGCUGCA    | UGCAGCAUCAUCAGGAUUCU    | Cleavage    |              | 1            |
| aqc-miR172a | PvAP2-ERF20  | 1,5         | 9,626  | 1           | 20        | 2530         | 2549       | AGAUCUUGAUGAUGCUGCA    | UGCAGCAUCAUCAGGAUUCU    | Cleavage    |              | 1            |
| aqc-miR172a | PvAP2-ERF113 | 2,5         | 22,52  | 1           | 20        | 3572         | 3591       | AGAUCUUGAUGAUGCUGCA    | AGCAGCAUCAUCAGGAUUCG    | Cleavage    |              | 1            |
| aqc-miR172b | PvAP2-ERF20  | 0,5         | 9,626  | 1           | 20        | 2530         | 2549       | GGAUCUUGAUGAUGCUGCA    | UGCAGCAUCAUCAGGAUUCU    | Cleavage    |              | 1            |
| aqc-miR172b | PvAP2-ERF25  | 0,5         | 16,15  | 1           | 20        | 3064         | 3083       | GGAUCUUGAUGAUGCUGCA    | UGCAGCAUCAUCAGGAUUCU    | Cleavage    |              | 1            |
| aqc-miR172b | PvAP2-ERF62  | 0,5         | 16,463 | 1           | 20        | 3200         | 3219       | GGAUCUUGAUGAUGCUGCA    | UGCAGCAUCAUCAGGAUUCU    | Cleavage    |              | 1            |
| aqc-miR172b | PvAP2-ERF173 | 1           | 11,33  | 1           | 20        | 3656         | 3675       | GGAUCUUGAUGAUGCUGCA    | UGCAGCAUCAUCAGGAUUUCU   | Cleavage    |              | 1            |
| aqc-miR172b | PvAP2-ERF78  | 1           | 10,114 | 1           | 20        | 3797         | 3816       | GGAUCUUGAUGAUGCUGCA    | UGCAGCAUCAUCAGGAUUUCU   | Cleavage    |              | 1            |
| aqc-miR172b | PvAP2-ERF113 | 2,5         | 22,52  | 1           | 20        | 3572         | 3591       | GGAUCUUGAUGAUGCUGCA    | AGCAGCAUCAUCAGGAUUCG    | Cleavage    |              | 1            |
| aqc-miR395a | PvAP2-ERF179 | 3           | 11,026 | 1           | 20        | 4356         | 4375       | CUGAAGGGUUUGGAGGAACU   | AGUUCUCCUUAACUCCUCAG    | Translation |              | 1            |
| aqc-miR395b | PvAP2-ERF179 | 3           | 11,026 | 1           | 20        | 4356         | 4375       | CUGAAGGGUUUGGAGGAACU   | AGUUCUCCUUAACUCCUCAG    | Translation |              | 1            |
| aqc-miR477d | PvAP2-ERF133 | 3           | 14,547 | 1           | 20        | 1126         | 1145       | CUCUUCUCAAAGGCUUCUA    | UAAAAGACUAUGAAGAGAG     | Translation |              | 1            |
| aqc-miR529  | PvAP2-ERF69  | 3           | 23,061 | 1           | 20        | 688          | 707        | AGAAGAGAGAGACACAACC    | GUUUGUCUUCUUCUUCUUCU    | Cleavage    |              | 1            |

#### Aegilops tauschii

| miRNA_Acc. | Target_Acc.  | Expectation | UPE    | miRNA_start | miRNA_end | Target_start | Target_end | miRNA_aligned_fragment  | Target_aligned_fragment | Inhibition | Target_Desc. | Multiplicity |
|------------|--------------|-------------|--------|-------------|-----------|--------------|------------|-------------------------|-------------------------|------------|--------------|--------------|
| ata-miR172 | PvAP2-ERF173 | 0,5         | 11,541 | 1           | 22        | 3656         | 3677       | UGAAGAUUCUUGAUGAUGCUGCA | UGCAGCAUCAUCAGGAUUCUCA  | Cleavage   |              | 1            |
| ata-miR172 | PvAP2-ERF78  | 0,5         | 5,882  | 1           | 22        | 3797         | 3818       | UGAAGAUUCUUGAUGAUGCUGCA | UGCAGCAUCAUCAGGAUUCUCA  | Cleavage   |              | 1            |
| ata-miR172 | PvAP2-ERF25  | 2           | 16,394 | 1           | 22        | 3064         | 3085       | UGAAGAUUCUUGAUGAUGCUGCA | UGCAGCAUCAUCAGGAUUCUCA  | Cleavage   |              | 1            |
| ata-miR172 | PvAP2-ERF62  | 2           | 18,825 | 1           | 22        | 3200         | 3221       | UGAAGAUUCUUGAUGAUGCUGCA | UGCAGCAUCAUCAGGAUUCUCA  | Cleavage   |              | 1            |
| ata-miR172 | PvAP2-ERF20  | 3           | 9,676  | 1           | 22        | 2530         | 2551       | UGAAGAUUCUUGAUGAUGCUGCA | UGCAGCAUCAUCAGGAUUCUCA  | Cleavage   |              | 1            |

#### Arabidopsis thaliana

| miRNA_Acc.     | Target_Acc.  | Expectation | UPE    | miRNA_start | miRNA_end | Target_start | Target_end | miRNA_aligned_fragment | Target_aligned_fragment | Inhibition | Target_Desc. | Multiplicity |
|----------------|--------------|-------------|--------|-------------|-----------|--------------|------------|------------------------|-------------------------|------------|--------------|--------------|
| ath-miR172a    | PvAP2-ERF173 | 0,5         | 11,33  | 1           | 20        | 3656         | 3675       | AGAUCUUGAUGAUGCUGCA    | UGCAGCAUCAUCAGGAUUUCU   | Cleavage   |              | 1            |
| ath-miR172a    | PvAP2-ERF78  | 0,5         | 10,114 | 1           | 20        | 3797         | 3816       | AGAUCUUGAUGAUGCUGCA    | UGCAGCAUCAUCAGGAUUUCU   | Cleavage   |              | 1            |
| ath-miR172a    | PvAP2-ERF20  | 1,5         | 9,626  | 1           | 20        | 2530         | 2549       | AGAUCUUGAUGAUGCUGCA    | UGCAGCAUCAUCAGGAUUCU    | Cleavage   |              | 1            |
| ath-miR172a    | PvAP2-ERF25  | 1,5         | 16,15  | 1           | 20        | 3064         | 3083       | AGAUCUUGAUGAUGCUGCA    | UGCAGCAUCAUCAGGAUUCU    | Cleavage   |              | 1            |
| ath-miR172a    | PvAP2-ERF62  | 1,5         | 16,463 | 1           | 20        | 3200         | 3219       | AGAUCUUGAUGAUGCUGCA    | UGCAGCAUCAUCAGGAUUCU    | Cleavage   |              | 1            |
| ath-miR172a    | PvAP2-ERF113 | 2,5         | 22,52  | 1           | 20        | 3572         | 3591       | AGAUCUUGAUGAUGCUGCA    | AGCAGCAUCAUCAGGAUUCG    | Cleavage   |              | 1            |
| ath-miR172b-3p | PvAP2-ERF173 | 0,5         | 11,33  | 1           | 20        | 3656         | 3675       | AGAUCUUGAUGAUGCUGCA    | UGCAGCAUCAUCAGGAUUUCU   | Cleavage   |              | 1            |
| ath-miR172b-3p | PvAP2-ERF78  | 0,5         | 10,114 | 1           | 20        | 3797         | 3816       | AGAUCUUGAUGAUGCUGCA    | UGCAGCAUCAUCAGGAUUUCU   | Cleavage   |              | 1            |
| ath-miR172b-3p | PvAP2-ERF20  | 1,5         | 9,626  | 1           | 20        | 2530         | 2549       | AGAUCUUGAUGAUGCUGCA    | UGCAGCAUCAUCAGGAUUCU    | Cleavage   |              | 1            |
| ath-miR172b-3p | PvAP2-ERF25  | 1,5         | 16,15  | 1           | 20        | 3064         | 3083       | AGAUCUUGAUGAUGCUGCA    | UGCAGCAUCAUCAGGAUUCU    | Cleavage   |              | 1            |
| ath-miR172b-3p | PvAP2-ERF62  | 1,5         | 16,463 | 1           | 20        | 3200         | 3219       | AGAUCUUGAUGAUGCUGCA    | UGCAGCAUCAUCAGGAUUCU    | Cleavage   |              | 1            |
| ath-miR172b-3p | PvAP2-ERF113 | 2,5         | 22,52  | 1           | 20        | 3572         | 3591       | AGAUCUUGAUGAUGCUGCA    | AGCAGCAUCAUCAGGAUUCG    | Cleavage   |              | 1            |
| ath-miR172c    | PvAP2-ERF173 | 0,5         | 11,33  | 1           | 21        | 3655         | 3675       | AGAUCUUGAUGAUGCUGCAG   | CUCAGCAUCAUCAGGAUUUCU   | Cleavage   |              | 1            |
| ath-miR172c    | PvAP2-ERF78  | 0,5         | 10,114 | 1           | 21        | 3796         | 3816       | AGAUCUUGAUGAUGCUGCAG   | CUCAGCAUCAUCAGGAUUUCU   | Cleavage   |              | 1            |
| ath-miR172c    | PvAP2-ERF20  | 1,5         | 9,626  | 1           | 21        | 2529         | 2549       | AGAUCUUGAUGAUGCUGCAG   | CUCAGCAUCAUCAGGAUUCU    | Cleavage   |              | 1            |

|                |              |     |        |   |    |      |      |                        |                       |             |   |
|----------------|--------------|-----|--------|---|----|------|------|------------------------|-----------------------|-------------|---|
| ath-miR172c    | PvAP2-ERF25  | 1,5 | 16,15  | 1 | 21 | 3063 | 3083 | AGAAUCUUGAUGAUGCUGCAG  | CUGCAGCAUCAUCAGGAUUC  | Cleavage    | 1 |
| ath-miR172c    | PvAP2-ERF62  | 1,5 | 16,463 | 1 | 21 | 3199 | 3219 | AGAAUCUUGAUGAUGCUGCAG  | CUGCAGCAUCAUCAGGAUUC  | Cleavage    | 1 |
| ath-miR172c    | PvAP2-ERF113 | 2,5 | 22,52  | 1 | 21 | 3571 | 3591 | AGAAUCUUGAUGAUGCUGCAG  | CAGCAGCAUCAUCAGGAUUCG | Cleavage    | 1 |
| ath-miR172d    | PvAP2-ERF78  | 0,5 | 10,114 | 1 | 21 | 3796 | 3816 | AGAAUCUUGAUGAUGCUGCAG  | CUGCAGCAUCAUCAGGAUUCU | Cleavage    | 1 |
| ath-miR172d    | PvAP2-ERF173 | 0,5 | 11,33  | 1 | 21 | 3655 | 3675 | AGAAUCUUGAUGAUGCUGCAG  | CUGCAGCAUCAUCAGGAUUCU | Cleavage    | 1 |
| ath-miR172d    | PvAP2-ERF62  | 1,5 | 16,463 | 1 | 21 | 3199 | 3219 | AGAAUCUUGAUGAUGCUGCAG  | CUGCAGCAUCAUCAGGAUUC  | Cleavage    | 1 |
| ath-miR172d    | PvAP2-ERF25  | 1,5 | 16,15  | 1 | 21 | 3063 | 3083 | AGAAUCUUGAUGAUGCUGCAG  | CUGCAGCAUCAUCAGGAUUC  | Cleavage    | 1 |
| ath-miR172d    | PvAP2-ERF20  | 1,5 | 9,626  | 1 | 21 | 2529 | 2549 | AGAAUCUUGAUGAUGCUGCAG  | CUGCAGCAUCAUCAGGAUUC  | Cleavage    | 1 |
| ath-miR172d    | PvAP2-ERF113 | 2,5 | 22,52  | 1 | 21 | 3571 | 3591 | AGAAUCUUGAUGAUGCUGCAG  | CAGCAGCAUCAUCAGGAUUCG | Cleavage    | 1 |
| ath-miR172e    | PvAP2-ERF20  | 0,5 | 9,626  | 1 | 20 | 2530 | 2549 | AGAAUCUUGAUGAUGCUGCA   | UGCAGCAUCAUCAGGAUUC   | Cleavage    | 1 |
| ath-miR172e    | PvAP2-ERF25  | 0,5 | 16,15  | 1 | 20 | 3064 | 3083 | AGAAUCUUGAUGAUGCUGCA   | UGCAGCAUCAUCAGGAUUC   | Cleavage    | 1 |
| ath-miR172e    | PvAP2-ERF62  | 0,5 | 16,463 | 1 | 20 | 3200 | 3219 | AGAAUCUUGAUGAUGCUGCA   | UGCAGCAUCAUCAGGAUUC   | Cleavage    | 1 |
| ath-miR172e    | PvAP2-ERF173 | 1   | 11,33  | 1 | 20 | 3656 | 3675 | AGAAUCUUGAUGAUGCUGCA   | UGCAGCAUCAUCAGGAUUCU  | Cleavage    | 1 |
| ath-miR172e    | PvAP2-ERF78  | 1   | 10,114 | 1 | 20 | 3797 | 3816 | AGAAUCUUGAUGAUGCUGCA   | UGCAGCAUCAUCAGGAUUCU  | Cleavage    | 1 |
| ath-miR172e    | PvAP2-ERF113 | 2,5 | 22,52  | 1 | 20 | 3572 | 3591 | AGAAUCUUGAUGAUGCUGCA   | AGCAGCAUCAUCAGGAUUCG  | Cleavage    | 1 |
| ath-miR407     | PvAP2-ERF12  | 3   | 15,715 | 1 | 21 | 3528 | 3548 | UUUAAAUCAUUAUUUGGU     | GCUCAAAGUGUAUGGUUUGAA | Cleavage    | 1 |
| ath-miR414     | PvAP2-ERF166 | 2,5 | 23,018 | 1 | 20 | 330  | 349  | UCAUCUUCAUCAUCUGCUC    | GAUGAUGAUGAUGAGGACGA  | Cleavage    | 1 |
| ath-miR414     | PvAP2-ERF176 | 2,5 | 17,029 | 1 | 20 | 860  | 879  | UCAUCUUCAUCAUCUGCUC    | GAGGAUGAUGAUGAUGAUGA  | Cleavage    | 1 |
| ath-miR414     | PvAP2-ERF180 | 3   | 8,848  | 1 | 21 | 845  | 865  | UCAUCUUCAUCAUCUGCUCA   | UGAUGGUUGAAGGAAGGAUGA | Translation | 1 |
| ath-miR415     | PvAP2-ERF151 | 2,5 | 8,646  | 1 | 20 | 1014 | 1033 | AACAGAGCAGAAACAGAACAA  | UCUUCUGUUUCUACUUUGUU  | Cleavage    | 1 |
| ath-miR5016    | PvAP2-ERF17  | 3   | 16,845 | 1 | 20 | 137  | 156  | UUUUUGGGAUUCUUGGAA     | ACUCAAGGGAUCCACAAGAA  | Cleavage    | 1 |
| ath-miR5021    | PvAP2-ERF172 | 1   | 11,663 | 1 | 20 | 1936 | 1955 | UGAGAAGAAGAAGAAAA      | CUUUUUUUUUUUUUUUUCA   | Cleavage    | 1 |
| ath-miR5021    | PvAP2-ERF155 | 2,5 | 19,919 | 1 | 20 | 250  | 269  | UGAGAAGAAGAAGAAAA      | UCUUUUUUUUUUUUUUUCU   | Cleavage    | 1 |
| ath-miR5021    | PvAP2-ERF117 | 2,5 | 13,45  | 1 | 20 | 377  | 396  | UGAGAAGAAGAAGAAAA      | UCUUUUUUUUUUUUUUUCU   | Cleavage    | 1 |
| ath-miR5021    | PvAP2-ERF43  | 2   | 0,284  | 1 | 20 | 313  | 332  | UGAGAAGAAGAAGAAAA      | UCUUUUUUUUUUUUUUUCU   | Cleavage    | 2 |
| ath-miR5021    | PvAP2-ERF43  | 3   | 14,086 | 1 | 20 | 1426 | 1445 | UGAGAAGAAGAAGAAAA      | UUUUUUUUUUUUUUUUUCA   | Cleavage    | 2 |
| ath-miR5021    | PvAP2-ERF18  | 2,5 | 5,525  | 1 | 20 | 360  | 379  | UGAGAAGAAGAAGAAAA      | UCUUUUUUUUUUUUUUUCU   | Cleavage    | 1 |
| ath-miR5021    | PvAP2-ERF101 | 3   | 14,685 | 1 | 20 | 427  | 446  | UGAGAAGAAGAAGAAAA      | CCUUUUUUUUUUUUUUUCU   | Translation | 1 |
| ath-miR5021    | PvAP2-ERF105 | 2,5 | 13,485 | 1 | 20 | 848  | 867  | UGAGAAGAAGAAGAAAA      | UCUUUUUUUUUUUUUUUCU   | Cleavage    | 1 |
| ath-miR5021    | PvAP2-ERF53  | 2   | 11,66  | 1 | 20 | 333  | 352  | UGAGAAGAAGAAGAAAA      | UAUUUUUUUUUUUUUUUCU   | Cleavage    | 1 |
| ath-miR5021    | PvAP2-ERF151 | 2,5 | 6,83   | 1 | 20 | 978  | 997  | UGAGAAGAAGAAGAAAA      | UCUUUUUUUUUUUUUUUCU   | Cleavage    | 1 |
| ath-miR5021    | PvAP2-ERF25  | 3   | 20,135 | 1 | 20 | 365  | 384  | UGAGAAGAAGAAGAAAA      | UUUUUUUUUUUUUUUUUCU   | Cleavage    | 1 |
| ath-miR5021    | PvAP2-ERF47  | 3   | 13,438 | 1 | 20 | 505  | 524  | UGAGAAGAAGAAGAAAA      | CUUUUUUUUUUUUUUUUCA   | Translation | 1 |
| ath-miR5021    | PvAP2-ERF125 | 3   | 8,996  | 1 | 20 | 1144 | 1163 | UGAGAAGAAGAAGAAAA      | UUUUUUUUUUUUUUUUUCU   | Cleavage    | 1 |
| ath-miR5021    | PvAP2-ERF179 | 3   | 6,981  | 1 | 20 | 1566 | 1585 | UGAGAAGAAGAAGAAAA      | UUUUUUUUUUUUUUUUUCU   | Cleavage    | 1 |
| ath-miR5021    | PvAP2-ERF22  | 3   | 19,08  | 1 | 20 | 862  | 881  | UGAGAAGAAGAAGAAAA      | UCUUUUUUUUUUUUUUUCU   | Cleavage    | 1 |
| ath-miR5021    | PvAP2-ERF138 | 3   | 13,948 | 1 | 20 | 55   | 74   | UGAGAAGAAGAAGAAAA      | UCUUUUUUUUUUUUUUUCA   | Cleavage    | 1 |
| ath-miR5021    | PvAP2-ERF32  | 3   | 7,17   | 1 | 20 | 320  | 339  | UGAGAAGAAGAAGAAAA      | CAUUUUUUUUUUUUUUUCA   | Translation | 1 |
| ath-miR5021    | PvAP2-ERF120 | 3   | 1,316  | 1 | 20 | 4426 | 4445 | UGAGAAGAAGAAGAAAA      | UUUUUUUUUUUUUUUUUCA   | Translation | 1 |
| ath-miR5655    | PvAP2-ERF151 | 3   | 6,923  | 1 | 20 | 1010 | 1029 | AAGUAGACACAUAAAGAGGA   | GCCUUUUUUUUUUUUUUUCU  | Cleavage    | 1 |
| ath-miR5658    | PvAP2-ERF136 | 0,5 | 15,234 | 1 | 20 | 557  | 576  | AUGAUGAUGAUGAUGAUGAA   | UUCAUCAUCAUCAUCUGU    | Cleavage    | 1 |
| ath-miR5658    | PvAP2-ERF163 | 1   | 1,942  | 1 | 20 | 260  | 279  | AUGAUGAUGAUGAUGAUGAA   | AUCAUCAUCAUCAUCAU     | Cleavage    | 1 |
| ath-miR5658    | PvAP2-ERF129 | 2   | 4,424  | 1 | 21 | 225  | 245  | AUGAUGAUGAUGAUGAUGAAA  | UCUCGUAUCAUCGUAUCAU   | Cleavage    | 1 |
| ath-miR5658    | PvAP2-ERF6   | 2   | 8,284  | 1 | 20 | 823  | 842  | AUGAUGAUGAUGAUGAUGAA   | GUCAUUUCAUCAUCAUCGU   | Cleavage    | 1 |
| ath-miR5658    | PvAP2-ERF56  | 2,5 | 13,323 | 1 | 20 | 6    | 25   | AUGAUGAUGAUGAUGAUGAA   | UUCAUCGUAUCAUCAUCA    | Cleavage    | 1 |
| ath-miR5658    | PvAP2-ERF169 | 2   | 23,281 | 1 | 20 | 1283 | 1302 | AUGAUGAUGAUGAUGAUGAA   | UUGAUCAUCAUGAUCAUCA   | Translation | 1 |
| ath-miR5658    | PVERF3       | 3   | 9,888  | 1 | 20 | 633  | 652  | AUGAUGAUGAUGAUGAUGAA   | CUCAUCACCAUCAUCAUC    | Cleavage    | 1 |
| ath-miR5658    | PvAP2-ERF72  | 3   | 9,608  | 1 | 20 | 351  | 370  | AUGAUGAUGAUGAUGAUGAA   | UUCACCAUCAUCUUCGUCG   | Cleavage    | 1 |
| ath-miR773b-3p | PvAP2-ERF25  | 3   | 11,803 | 1 | 20 | 1403 | 1422 | UUUGAUUCAGCUUUUGUCU    | AUAUAAAAGUUGGAUCAAU   | Cleavage    | 1 |
| ath-miR837-5p  | PvAP2-ERF85  | 3   | 17,282 | 1 | 21 | 317  | 337  | AUCAGUUUCUUGUUCGUUUC   | UGAAGCGAACAGAGUCUGGU  | Cleavage    | 1 |
| ath-miR838     | PvAP2-ERF84  | 2   | 12,97  | 1 | 21 | 486  | 506  | UUUUUUUUUUUUUUUUUGCACA | UGUGCAGGAAGAAGAAGA    | Translation | 1 |
| ath-miR838     | PvAP2-ERF144 | 2   | 18,622 | 1 | 20 | 939  | 958  | UUUUUUUUUUUUUUUUUGCAC  | GAGCAAGAAGUAGAGGAGAA  | Cleavage    | 1 |
| ath-miR838     | PvAP2-ERF150 | 3   | 11,983 | 1 | 21 | 1411 | 1431 | UUUUUUUUUUUUUUUUUGCACA | UGUGAAGGGAGUGGAAGA    | Cleavage    | 1 |
| ath-miR838     | PvAP2-ERF156 | 3   | 21,194 | 1 | 20 | 1199 | 1218 | UUUUUUUUUUUUUUUUUGCAC  | AUGUGAGAAGAAGAAAA     | Translation | 1 |
| ath-miR838     | PvAP2-ERF24  | 3   | 9,672  | 1 | 20 | 209  | 228  | UUUUUUUUUUUUUUUUUGCAC  | GUGAAGGAAGAAGAGAA     | Translation | 1 |

|               |              |     |        |   |    |      |      |                       |                       |             |   |
|---------------|--------------|-----|--------|---|----|------|------|-----------------------|-----------------------|-------------|---|
| ath-miR851-3p | PvAP2-ERF138 | 2,5 | 14,77  | 1 | 20 | 222  | 241  | UGGGUGGCAAACAAGACGA   | UUGUUUUUUUGUCAUCAUA   | Cleavage    | 1 |
| ath-miR854a   | PvAP2-ERF6   | 3   | 16,067 | 1 | 20 | 863  | 882  | GAUGAGGAUAGGGAGGAGGA  | UCCUCGUCUUUAUCCUCGUU  | Cleavage    | 1 |
| ath-miR854a   | PvAP2-ERF172 | 3   | 19,957 | 1 | 20 | 2795 | 2814 | GAUGAGGAUAGGGAGGAGGA  | UCCUCUUCUUCUUCUUCUUC  | Translation | 1 |
| ath-miR854b   | PvAP2-ERF6   | 3   | 16,067 | 1 | 20 | 863  | 882  | GAUGAGGAUAGGGAGGAGGA  | UCCUCGUCUUUAUCCUCGUU  | Cleavage    | 1 |
| ath-miR854b   | PvAP2-ERF172 | 3   | 19,957 | 1 | 20 | 2795 | 2814 | GAUGAGGAUAGGGAGGAGGA  | UCCUCUUCUUCUUCUUCUUC  | Translation | 1 |
| ath-miR854c   | PvAP2-ERF6   | 3   | 16,067 | 1 | 20 | 863  | 882  | GAUGAGGAUAGGGAGGAGGA  | UCCUCGUCUUUAUCCUCGUU  | Cleavage    | 1 |
| ath-miR854c   | PvAP2-ERF172 | 3   | 19,957 | 1 | 20 | 2795 | 2814 | GAUGAGGAUAGGGAGGAGGA  | UCCUCUUCUUCUUCUUCUUC  | Translation | 1 |
| ath-miR854d   | PvAP2-ERF6   | 3   | 16,067 | 1 | 20 | 863  | 882  | GAUGAGGAUAGGGAGGAGGA  | UCCUCGUCUUUAUCCUCGUU  | Cleavage    | 1 |
| ath-miR854d   | PvAP2-ERF172 | 3   | 19,957 | 1 | 20 | 2795 | 2814 | GAUGAGGAUAGGGAGGAGGA  | UCCUCUUCUUCUUCUUCUUC  | Translation | 1 |
| ath-miR854e   | PvAP2-ERF6   | 3   | 16,067 | 1 | 20 | 863  | 882  | GAUGAGGAUAGGGAGGAGGA  | UCCUCGUCUUUAUCCUCGUU  | Cleavage    | 1 |
| ath-miR854e   | PvAP2-ERF172 | 3   | 19,957 | 1 | 20 | 2795 | 2814 | GAUGAGGAUAGGGAGGAGGA  | UCCUCUUCUUCUUCUUCUUC  | Translation | 1 |
| ath-miR855    | PvAP2-ERF32  | 3   | 18,894 | 1 | 20 | 2219 | 2238 | AGCAAAAGCUAAGGAAAAGG  | CUUUUAUCUUUUGCUUUUGCU | Translation | 1 |
| ath-miR859    | PvAP2-ERF128 | 2,5 | 20,487 | 1 | 20 | 691  | 710  | UCUCUCUGUUUGGAGGACAA  | UUGACUUCACCCUAGAGAGA  | Translation | 1 |
| ath-miR863-3p | PvAP2-ERF10  | 3   | 19,124 | 1 | 20 | 1071 | 1091 | UUGAGAGCAACAAGA-CAUAA | UUUAUGAUUCUGCUCUCAAA  | Translation | 1 |
| ath-miR866-5p | PvAP2-ERF120 | 3   | 15,716 | 1 | 20 | 1550 | 1569 | UCAAGGAACGGAUUUUGUUA  | UAACAAAACUCUUUCUUUGA  | Translation | 1 |

#### Brachypodium distachyon

| miRNA_Acc.       | Target_Acc.  | Expectation | UPE    | miRNA_start | miRNA_end | Target_start | Target_end | miRNA_aligned_fragment  | Target_aligned_fragment | Inhibition  | Target_Desc. | Multiplicity |
|------------------|--------------|-------------|--------|-------------|-----------|--------------|------------|-------------------------|-------------------------|-------------|--------------|--------------|
| bdi-miR172a-3p   | PvAP2-ERF173 | 0,5         | 11,33  | 1           | 20        | 3656         | 3675       | AGAAUCUUGAUGAUGCUGCA    | UGCAGCAUCAUCAGGAUUCU    | Cleavage    |              | 1            |
| bdi-miR172a-3p   | PvAP2-ERF78  | 0,5         | 10,114 | 1           | 20        | 3797         | 3816       | AGAAUCUUGAUGAUGCUGCA    | UGCAGCAUCAUCAGGAUUCU    | Cleavage    |              | 1            |
| bdi-miR172a-3p   | PvAP2-ERF20  | 1,5         | 9,626  | 1           | 20        | 2530         | 2549       | AGAAUCUUGAUGAUGCUGCA    | UGCAGCAUCAUCAGGAUUCU    | Cleavage    |              | 1            |
| bdi-miR172a-3p   | PvAP2-ERF25  | 1,5         | 16,15  | 1           | 20        | 3064         | 3083       | AGAAUCUUGAUGAUGCUGCA    | UGCAGCAUCAUCAGGAUUCU    | Cleavage    |              | 1            |
| bdi-miR172a-3p   | PvAP2-ERF62  | 1,5         | 16,463 | 1           | 20        | 3200         | 3219       | AGAAUCUUGAUGAUGCUGCA    | UGCAGCAUCAUCAGGAUUCU    | Cleavage    |              | 1            |
| bdi-miR172a-3p   | PvAP2-ERF113 | 2,5         | 22,52  | 1           | 20        | 3572         | 3591       | AGAAUCUUGAUGAUGCUGCA    | AGCAGCAUCAUCAGGAUUCG    | Cleavage    |              | 1            |
| bdi-miR172b      | PvAP2-ERF20  | 0,5         | 9,626  | 1           | 20        | 2530         | 2549       | GAAUCUUGAUGAUGCUGCA     | UGCAGCAUCAUCAGGAUUCU    | Cleavage    |              | 1            |
| bdi-miR172b      | PvAP2-ERF25  | 0,5         | 16,15  | 1           | 20        | 3064         | 3083       | GAAUCUUGAUGAUGCUGCA     | UGCAGCAUCAUCAGGAUUCU    | Cleavage    |              | 1            |
| bdi-miR172b      | PvAP2-ERF62  | 0,5         | 16,463 | 1           | 20        | 3200         | 3219       | GAAUCUUGAUGAUGCUGCA     | UGCAGCAUCAUCAGGAUUCU    | Cleavage    |              | 1            |
| bdi-miR172b      | PvAP2-ERF173 | 1           | 11,33  | 1           | 20        | 3656         | 3675       | GAAUCUUGAUGAUGCUGCA     | UGCAGCAUCAUCAGGAUUCU    | Cleavage    |              | 1            |
| bdi-miR172b      | PvAP2-ERF78  | 1           | 10,114 | 1           | 20        | 3797         | 3816       | GAAUCUUGAUGAUGCUGCA     | UGCAGCAUCAUCAGGAUUCU    | Cleavage    |              | 1            |
| bdi-miR172b      | PvAP2-ERF113 | 2,5         | 22,52  | 1           | 20        | 3572         | 3591       | GAAUCUUGAUGAUGCUGCA     | AGCAGCAUCAUCAGGAUUCG    | Cleavage    |              | 1            |
| bdi-miR172d      | PvAP2-ERF173 | 0           | 11,33  | 1           | 21        | 3655         | 3675       | AGAAUCUUGAUGAUGCUGCAG   | CUGCAGCAUCAUCAGGAUUCU   | Cleavage    |              | 1            |
| bdi-miR172d      | PvAP2-ERF78  | 0           | 10,114 | 1           | 21        | 3796         | 3816       | AGAAUCUUGAUGAUGCUGCAG   | CUGCAGCAUCAUCAGGAUUCU   | Cleavage    |              | 1            |
| bdi-miR172d      | PvAP2-ERF20  | 1           | 9,626  | 1           | 21        | 2529         | 2549       | AGAAUCUUGAUGAUGCUGCAG   | CUGCAGCAUCAUCAGGAUUCU   | Cleavage    |              | 1            |
| bdi-miR172d      | PvAP2-ERF25  | 1           | 16,15  | 1           | 21        | 3063         | 3083       | AGAAUCUUGAUGAUGCUGCAG   | CUGCAGCAUCAUCAGGAUUCU   | Cleavage    |              | 1            |
| bdi-miR172d      | PvAP2-ERF62  | 1           | 16,463 | 1           | 21        | 3199         | 3219       | AGAAUCUUGAUGAUGCUGCAG   | CUGCAGCAUCAUCAGGAUUCU   | Cleavage    |              | 1            |
| bdi-miR172d      | PvAP2-ERF113 | 2           | 22,52  | 1           | 21        | 3571         | 3591       | AGAAUCUUGAUGAUGCUGCAG   | CAGCAGCAUCAUCAGGAUUCG   | Cleavage    |              | 1            |
| bdi-miR395j-5p   | PvAP2-ERF78  | 3           | 16,571 | 1           | 20        | 867          | 886        | GUUCCCGCAAGCACUUCAC     | GUGUAGGGAUUGCGGAAAC     | Cleavage    |              | 1            |
| bdi-miR395j-5p   | PvAP2-ERF173 | 3           | 13,786 | 1           | 20        | 1187         | 1206       | GUUCCCGCAAGCACUUCAC     | GUGUAGGGAUUGCGGAAAC     | Cleavage    |              | 1            |
| bdi-miR5163b-3p  | PvAP2-ERF126 | 3           | 10,695 | 1           | 20        | 1483         | 1502       | UAGAUUUUACAGGUUGUGUG    | CACCCAAACUAGGUAUCAUA    | Cleavage    |              | 1            |
| bdi-miR5175a     | PvAP2-ERF105 | 2,5         | 7,849  | 1           | 20        | 163          | 182        | AAGAAUUUAGGAACGGAGGG    | CACUCCUUUCUAAAUCUUU     | Cleavage    |              | 1            |
| bdi-miR7717b-5p  | PvAP2-ERF148 | 3           | 20,454 | 1           | 24        | 1824         | 1847       | UCUAAGACGACUGAGAAUAACUA | UAUUUUUUUAUCAGUUGUUUAGG | Cleavage    |              | 1            |
| bdi-miR7721-3p   | PvAP2-ERF172 | 2,5         | 14,795 | 1           | 20        | 2358         | 2377       | AAAGUUUGCAUAGAAUUA      | UGAAUGCUGAGCAAACUUU     | Translation |              | 1            |
| bdi-miR7725a-3p  | PvAP2-ERF138 | 3           | 15,859 | 1           | 20        | 2068         | 2087       | UGCAACAAGUGAUUUUCGU     | AUCAAAUACAUCUUGUUGCA    | Cleavage    |              | 1            |
| bdi-miR7747-5p   | PvAP2-ERF129 | 3           | 18,292 | 1           | 22        | 1073         | 1094       | AUCAGAUUUUUUGUUGAGGA    | UACUGCAAUAGUGCAAUCUGAU  | Translation |              | 1            |
| bdi-miR7757-3p.2 | PvAP2-ERF128 | 2           | 14,57  | 1           | 20        | 2578         | 2597       | AGAAUACUUGAUGUUAAGU     | UCUUACAUAUAGGUUAUCU     | Cleavage    |              | 1            |
| bdi-miR7776-3p.1 | PvAP2-ERF44  | 3           | 2,469  | 1           | 20        | 21           | 40         | AAAGAUACAGAGGGCAACG     | CGUUUCUCUUUAUUCUUU      | Translation |              | 1            |
| bdi-miR7781-3p   | PvAP2-ERF63  | 3           | 15,164 | 1           | 20        | 1083         | 1102       | CAUGUCUGAUGACAGAAAA     | UUUUUUUCACUGCAGACAUC    | Cleavage    |              | 1            |

#### Brassica napus

| miRNA_Acc.  | Target_Acc.  | Expectation | UPE    | miRNA_start | miRNA_end | Target_start | Target_end | miRNA_aligned_fragment | Target_aligned_fragment | Inhibition | Target_Desc. | Multiplicity |
|-------------|--------------|-------------|--------|-------------|-----------|--------------|------------|------------------------|-------------------------|------------|--------------|--------------|
| bna-miR172a | PvAP2-ERF173 | 0,5         | 11,33  | 1           | 20        | 3656         | 3675       | AGAAUCUUGAUGAUGCUGCA   | UGCAGCAUCAUCAGGAUUCU    | Cleavage   |              | 1            |
| bna-miR172a | PvAP2-ERF78  | 0,5         | 10,114 | 1           | 20        | 3797         | 3816       | AGAAUCUUGAUGAUGCUGCA   | UGCAGCAUCAUCAGGAUUCU    | Cleavage   |              | 1            |
| bna-miR172a | PvAP2-ERF20  | 1,5         | 9,626  | 1           | 20        | 2530         | 2549       | AGAAUCUUGAUGAUGCUGCA   | UGCAGCAUCAUCAGGAUUCU    | Cleavage   |              | 1            |
| bna-miR172a | PvAP2-ERF25  | 1,5         | 16,15  | 1           | 20        | 3064         | 3083       | AGAAUCUUGAUGAUGCUGCA   | UGCAGCAUCAUCAGGAUUCU    | Cleavage   |              | 1            |
| bna-miR172a | PvAP2-ERF62  | 1,5         | 16,463 | 1           | 20        | 3200         | 3219       | AGAAUCUUGAUGAUGCUGCA   | UGCAGCAUCAUCAGGAUUCU    | Cleavage   |              | 1            |
| bna-miR172a | PvAP2-ERF113 | 2,5         | 22,52  | 1           | 20        | 3572         | 3591       | AGAAUCUUGAUGAUGCUGCA   | AGCAGCAUCAUCAGGAUUCG    | Cleavage   |              | 1            |
| bna-miR172b | PvAP2-ERF20  | 0,5         | 9,626  | 1           | 20        | 2530         | 2549       | GAAUCUUGAUGAUGCUGCA    | UGCAGCAUCAUCAGGAUUCU    | Cleavage   |              | 1            |

|             |              |     |        |   |    |      |      |                       |                       |          |  |   |
|-------------|--------------|-----|--------|---|----|------|------|-----------------------|-----------------------|----------|--|---|
| bna-miR172b | PvAP2-ERF25  | 0,5 | 16,15  | 1 | 20 | 3064 | 3083 | GGAUUCUUGAUGAUGCUGCA  | UGCAGCAUCAUCAGGAUUC   | Cleavage |  | 1 |
| bna-miR172b | PvAP2-ERF62  | 0,5 | 16,463 | 1 | 20 | 3200 | 3219 | GGAUUCUUGAUGAUGCUGCA  | UGCAGCAUCAUCAGGAUUC   | Cleavage |  | 1 |
| bna-miR172b | PvAP2-ERF173 | 1   | 11,33  | 1 | 20 | 3656 | 3675 | GGAUUCUUGAUGAUGCUGCA  | UGCAGCAUCAUCAGGAUUCU  | Cleavage |  | 1 |
| bna-miR172b | PvAP2-ERF78  | 1   | 10,114 | 1 | 20 | 3797 | 3816 | GGAUUCUUGAUGAUGCUGCA  | UGCAGCAUCAUCAGGAUUCU  | Cleavage |  | 1 |
| bna-miR172b | PvAP2-ERF113 | 2,5 | 22,52  | 1 | 20 | 3572 | 3591 | GGAUUCUUGAUGAUGCUGCA  | AGCAGCAUCAUCAGGAUUCG  | Cleavage |  | 1 |
| bna-miR172c | PvAP2-ERF20  | 0,5 | 9,626  | 1 | 20 | 2530 | 2549 | GGAUUCUUGAUGAUGCUGCA  | UGCAGCAUCAUCAGGAUUC   | Cleavage |  | 1 |
| bna-miR172c | PvAP2-ERF25  | 0,5 | 16,15  | 1 | 20 | 3064 | 3083 | GGAUUCUUGAUGAUGCUGCA  | UGCAGCAUCAUCAGGAUUC   | Cleavage |  | 1 |
| bna-miR172c | PvAP2-ERF62  | 0,5 | 16,463 | 1 | 20 | 3200 | 3219 | GGAUUCUUGAUGAUGCUGCA  | UGCAGCAUCAUCAGGAUUC   | Cleavage |  | 1 |
| bna-miR172c | PvAP2-ERF173 | 1   | 11,33  | 1 | 20 | 3656 | 3675 | GGAUUCUUGAUGAUGCUGCA  | UGCAGCAUCAUCAGGAUUCU  | Cleavage |  | 1 |
| bna-miR172c | PvAP2-ERF78  | 1   | 10,114 | 1 | 20 | 3797 | 3816 | GGAUUCUUGAUGAUGCUGCA  | UGCAGCAUCAUCAGGAUUCU  | Cleavage |  | 1 |
| bna-miR172c | PvAP2-ERF113 | 2,5 | 22,52  | 1 | 20 | 3572 | 3591 | GGAUUCUUGAUGAUGCUGCA  | AGCAGCAUCAUCAGGAUUCG  | Cleavage |  | 1 |
| bna-miR172d | PvAP2-ERF173 | 0,5 | 11,33  | 1 | 21 | 3655 | 3675 | AGAAUCUUGAUGAUGCUGCAG | CUGCAGCAUCAUCAGGAUUCU | Cleavage |  | 1 |
| bna-miR172d | PvAP2-ERF78  | 0,5 | 10,114 | 1 | 21 | 3796 | 3816 | AGAAUCUUGAUGAUGCUGCAG | CUGCAGCAUCAUCAGGAUUCU | Cleavage |  | 1 |
| bna-miR172d | PvAP2-ERF20  | 1,5 | 9,626  | 1 | 21 | 2529 | 2549 | AGAAUCUUGAUGAUGCUGCAG | CUGCAGCAUCAUCAGGAUUC  | Cleavage |  | 1 |
| bna-miR172d | PvAP2-ERF25  | 1,5 | 16,15  | 1 | 21 | 3063 | 3083 | AGAAUCUUGAUGAUGCUGCAG | CUGCAGCAUCAUCAGGAUUC  | Cleavage |  | 1 |
| bna-miR172d | PvAP2-ERF62  | 1,5 | 16,463 | 1 | 21 | 3199 | 3219 | AGAAUCUUGAUGAUGCUGCAG | CUGCAGCAUCAUCAGGAUUC  | Cleavage |  | 1 |
| bna-miR172d | PvAP2-ERF113 | 2,5 | 22,52  | 1 | 21 | 3571 | 3591 | AGAAUCUUGAUGAUGCUGCAG | CAGCAGCAUCAUCAGGAUUCG | Cleavage |  | 1 |

#### Brassica oleracea

| miRNA_Acc.  | Target_Acc.  | Expectation | UPE    | miRNA_start | miRNA_end | Target_start | Target_end | miRNA_aligned_fragment | Target_aligned_fragment | Inhibition | Target_Desc. | Multiplicity |
|-------------|--------------|-------------|--------|-------------|-----------|--------------|------------|------------------------|-------------------------|------------|--------------|--------------|
| bol-miR172a | PvAP2-ERF173 | 0,5         | 11,33  | 1           | 20        | 3656         | 3675       | AGAAUCUUGAUGAUGCUGCA   | UGCAGCAUCAUCAGGAUUCU    | Cleavage   |              | 1            |
| bol-miR172a | PvAP2-ERF78  | 0,5         | 10,114 | 1           | 20        | 3797         | 3816       | AGAAUCUUGAUGAUGCUGCA   | UGCAGCAUCAUCAGGAUUCU    | Cleavage   |              | 1            |
| bol-miR172a | PvAP2-ERF20  | 1,5         | 9,626  | 1           | 20        | 2530         | 2549       | AGAAUCUUGAUGAUGCUGCA   | UGCAGCAUCAUCAGGAUUC     | Cleavage   |              | 1            |
| bol-miR172a | PvAP2-ERF25  | 1,5         | 16,15  | 1           | 20        | 3064         | 3083       | AGAAUCUUGAUGAUGCUGCA   | UGCAGCAUCAUCAGGAUUC     | Cleavage   |              | 1            |
| bol-miR172a | PvAP2-ERF62  | 1,5         | 16,463 | 1           | 20        | 3200         | 3219       | AGAAUCUUGAUGAUGCUGCA   | UGCAGCAUCAUCAGGAUUC     | Cleavage   |              | 1            |
| bol-miR172a | PvAP2-ERF113 | 2,5         | 22,52  | 1           | 20        | 3572         | 3591       | AGAAUCUUGAUGAUGCUGCA   | AGCAGCAUCAUCAGGAUUCG    | Cleavage   |              | 1            |
| bol-miR172b | PvAP2-ERF173 | 0,5         | 11,33  | 1           | 20        | 3656         | 3675       | AGAAUCUUGAUGAUGCUGCA   | UGCAGCAUCAUCAGGAUUCU    | Cleavage   |              | 1            |
| bol-miR172b | PvAP2-ERF78  | 0,5         | 10,114 | 1           | 20        | 3797         | 3816       | AGAAUCUUGAUGAUGCUGCA   | UGCAGCAUCAUCAGGAUUCU    | Cleavage   |              | 1            |
| bol-miR172b | PvAP2-ERF20  | 1,5         | 9,626  | 1           | 20        | 2530         | 2549       | AGAAUCUUGAUGAUGCUGCA   | UGCAGCAUCAUCAGGAUUC     | Cleavage   |              | 1            |
| bol-miR172b | PvAP2-ERF25  | 1,5         | 16,15  | 1           | 20        | 3064         | 3083       | AGAAUCUUGAUGAUGCUGCA   | UGCAGCAUCAUCAGGAUUC     | Cleavage   |              | 1            |
| bol-miR172b | PvAP2-ERF62  | 1,5         | 16,463 | 1           | 20        | 3200         | 3219       | AGAAUCUUGAUGAUGCUGCA   | UGCAGCAUCAUCAGGAUUC     | Cleavage   |              | 1            |
| bol-miR172b | PvAP2-ERF113 | 2,5         | 22,52  | 1           | 20        | 3572         | 3591       | AGAAUCUUGAUGAUGCUGCA   | AGCAGCAUCAUCAGGAUUCG    | Cleavage   |              | 1            |

#### Brassica rapa

| miRNA_Acc.     | Target_Acc.  | Expectation | UPE    | miRNA_start | miRNA_end | Target_start | Target_end | miRNA_aligned_fragment | Target_aligned_fragment | Inhibition | Target_Desc. | Multiplicity |
|----------------|--------------|-------------|--------|-------------|-----------|--------------|------------|------------------------|-------------------------|------------|--------------|--------------|
| bra-miR172a    | PvAP2-ERF173 | 0,5         | 11,33  | 1           | 20        | 3656         | 3675       | AGAAUCUUGAUGAUGCUGCA   | UGCAGCAUCAUCAGGAUUCU    | Cleavage   |              | 1            |
| bra-miR172a    | PvAP2-ERF78  | 0,5         | 10,114 | 1           | 20        | 3797         | 3816       | AGAAUCUUGAUGAUGCUGCA   | UGCAGCAUCAUCAGGAUUCU    | Cleavage   |              | 1            |
| bra-miR172a    | PvAP2-ERF20  | 1,5         | 9,626  | 1           | 20        | 2530         | 2549       | AGAAUCUUGAUGAUGCUGCA   | UGCAGCAUCAUCAGGAUUC     | Cleavage   |              | 1            |
| bra-miR172a    | PvAP2-ERF25  | 1,5         | 16,15  | 1           | 20        | 3064         | 3083       | AGAAUCUUGAUGAUGCUGCA   | UGCAGCAUCAUCAGGAUUC     | Cleavage   |              | 1            |
| bra-miR172a    | PvAP2-ERF62  | 1,5         | 16,463 | 1           | 20        | 3200         | 3219       | AGAAUCUUGAUGAUGCUGCA   | UGCAGCAUCAUCAGGAUUC     | Cleavage   |              | 1            |
| bra-miR172a    | PvAP2-ERF113 | 2,5         | 22,52  | 1           | 20        | 3572         | 3591       | AGAAUCUUGAUGAUGCUGCA   | AGCAGCAUCAUCAGGAUUCG    | Cleavage   |              | 1            |
| bra-miR172b-3p | PvAP2-ERF173 | 0,5         | 11,33  | 1           | 20        | 3656         | 3675       | AGAAUCUUGAUGAUGCUGCA   | UGCAGCAUCAUCAGGAUUCU    | Cleavage   |              | 1            |
| bra-miR172b-3p | PvAP2-ERF78  | 0,5         | 10,114 | 1           | 20        | 3797         | 3816       | AGAAUCUUGAUGAUGCUGCA   | UGCAGCAUCAUCAGGAUUCU    | Cleavage   |              | 1            |
| bra-miR172b-3p | PvAP2-ERF20  | 1,5         | 9,626  | 1           | 20        | 2530         | 2549       | AGAAUCUUGAUGAUGCUGCA   | UGCAGCAUCAUCAGGAUUC     | Cleavage   |              | 1            |
| bra-miR172b-3p | PvAP2-ERF25  | 1,5         | 16,15  | 1           | 20        | 3064         | 3083       | AGAAUCUUGAUGAUGCUGCA   | UGCAGCAUCAUCAGGAUUC     | Cleavage   |              | 1            |
| bra-miR172b-3p | PvAP2-ERF62  | 1,5         | 16,463 | 1           | 20        | 3200         | 3219       | AGAAUCUUGAUGAUGCUGCA   | UGCAGCAUCAUCAGGAUUC     | Cleavage   |              | 1            |
| bra-miR172b-3p | PvAP2-ERF113 | 2,5         | 22,52  | 1           | 20        | 3572         | 3591       | AGAAUCUUGAUGAUGCUGCA   | AGCAGCAUCAUCAGGAUUCG    | Cleavage   |              | 1            |

#### Cynara cardunculus

| miRNA_Acc.  | Target_Acc.  | Expectation | UPE    | miRNA_start | miRNA_end | Target_start | Target_end | miRNA_aligned_fragment | Target_aligned_fragment | Inhibition  | Target_Desc. | Multiplicity |
|-------------|--------------|-------------|--------|-------------|-----------|--------------|------------|------------------------|-------------------------|-------------|--------------|--------------|
| cca-miR172  | PvAP2-ERF173 | 0,5         | 11,33  | 1           | 20        | 3656         | 3675       | AGAAUCUUGAUGAUGCUGCA   | UGCAGCAUCAUCAGGAUUCU    | Cleavage    |              | 1            |
| cca-miR172  | PvAP2-ERF78  | 0,5         | 10,114 | 1           | 20        | 3797         | 3816       | AGAAUCUUGAUGAUGCUGCA   | UGCAGCAUCAUCAGGAUUCU    | Cleavage    |              | 1            |
| cca-miR172  | PvAP2-ERF20  | 1,5         | 9,626  | 1           | 20        | 2530         | 2549       | AGAAUCUUGAUGAUGCUGCA   | UGCAGCAUCAUCAGGAUUC     | Cleavage    |              | 1            |
| cca-miR172  | PvAP2-ERF25  | 1,5         | 16,15  | 1           | 20        | 3064         | 3083       | AGAAUCUUGAUGAUGCUGCA   | UGCAGCAUCAUCAGGAUUC     | Cleavage    |              | 1            |
| cca-miR172  | PvAP2-ERF62  | 1,5         | 16,463 | 1           | 20        | 3200         | 3219       | AGAAUCUUGAUGAUGCUGCA   | UGCAGCAUCAUCAGGAUUC     | Cleavage    |              | 1            |
| cca-miR172  | PvAP2-ERF113 | 2,5         | 22,52  | 1           | 20        | 3572         | 3591       | AGAAUCUUGAUGAUGCUGCA   | AGCAGCAUCAUCAGGAUUCG    | Cleavage    |              | 1            |
| cca-miR6107 | PvAP2-ERF133 | 3           | 11,712 | 1           | 20        | 2832         | 2851       | AAAGGGGACAAAUUCUGGUA   | CACCAAUUGUUGUCCUUU      | Cleavage    |              | 1            |
| cca-miR6113 | PvAP2-ERF141 | 2,5         | 15,62  | 1           | 22        | 696          | 717        | UCUGAAACUCAAGAACACGUUG | CCACCUUUCUUCAGUUUUGA    | Translation |              | 1            |



| Cucumis melo      |              |             |        |             |           |              |            |                         |                         |            |              |              |
|-------------------|--------------|-------------|--------|-------------|-----------|--------------|------------|-------------------------|-------------------------|------------|--------------|--------------|
| miRNA_Acc.        | Target_Acc.  | Expectation | UPE    | miRNA_start | miRNA_end | Target_start | Target_end | miRNA_aligned_fragment  | Target_aligned_fragment | Inhibition | Target_Desc. | Multiplicity |
| cme-miR172a       | PvAP2-ERF20  | 0,5         | 9,626  | 1           | 21        | 2529         | 2549       | GGAAUCUUGAUGAUGCUGCAG   | CUGCAGCAUCAUCAGGAUUCU   | Cleavage   |              | 1            |
| cme-miR172a       | PvAP2-ERF25  | 0,5         | 16,15  | 1           | 21        | 3063         | 3083       | GGAAUCUUGAUGAUGCUGCAG   | CUGCAGCAUCAUCAGGAUUCU   | Cleavage   |              | 1            |
| cme-miR172a       | PvAP2-ERF62  | 0,5         | 16,463 | 1           | 21        | 3199         | 3219       | GGAAUCUUGAUGAUGCUGCAG   | CUGCAGCAUCAUCAGGAUUCU   | Cleavage   |              | 1            |
| cme-miR172a       | PvAP2-ERF173 | 1           | 11,33  | 1           | 21        | 3655         | 3675       | GGAAUCUUGAUGAUGCUGCAG   | CUGCAGCAUCAUCAGGAUUCU   | Cleavage   |              | 1            |
| cme-miR172a       | PvAP2-ERF78  | 1           | 10,114 | 1           | 21        | 3796         | 3816       | GGAAUCUUGAUGAUGCUGCAG   | CUGCAGCAUCAUCAGGAUUCU   | Cleavage   |              | 1            |
| cme-miR172a       | PvAP2-ERF113 | 2,5         | 22,52  | 1           | 21        | 3571         | 3591       | GGAAUCUUGAUGAUGCUGCAG   | CAGCAGCAUCAUCAGGAUUCG   | Cleavage   |              | 1            |
| cme-miR172b       | PvAP2-ERF173 | 0,5         | 11,33  | 1           | 20        | 3656         | 3675       | AGAAUCUUGAUGAUGCUGCA    | UGCAGCAUCAUCAGGAUUCU    | Cleavage   |              | 1            |
| cme-miR172b       | PvAP2-ERF78  | 0,5         | 10,114 | 1           | 20        | 3797         | 3816       | AGAAUCUUGAUGAUGCUGCA    | UGCAGCAUCAUCAGGAUUCU    | Cleavage   |              | 1            |
| cme-miR172b       | PvAP2-ERF20  | 1,5         | 9,626  | 1           | 20        | 2530         | 2549       | AGAAUCUUGAUGAUGCUGCA    | UGCAGCAUCAUCAGGAUUCU    | Cleavage   |              | 1            |
| cme-miR172b       | PvAP2-ERF25  | 1,5         | 16,15  | 1           | 20        | 3064         | 3083       | AGAAUCUUGAUGAUGCUGCA    | UGCAGCAUCAUCAGGAUUCU    | Cleavage   |              | 1            |
| cme-miR172b       | PvAP2-ERF62  | 1,5         | 16,463 | 1           | 20        | 3200         | 3219       | AGAAUCUUGAUGAUGCUGCA    | UGCAGCAUCAUCAGGAUUCU    | Cleavage   |              | 1            |
| cme-miR172b       | PvAP2-ERF113 | 2,5         | 22,52  | 1           | 20        | 3572         | 3591       | AGAAUCUUGAUGAUGCUGCA    | AGCAGCAUCAUCAGGAUUCG    | Cleavage   |              | 1            |
| cme-miR172c       | PvAP2-ERF173 | 0,5         | 11,33  | 1           | 20        | 3656         | 3675       | AGAAUCUUGAUGAUGCUGCA    | UGCAGCAUCAUCAGGAUUCU    | Cleavage   |              | 1            |
| cme-miR172c       | PvAP2-ERF78  | 0,5         | 10,114 | 1           | 20        | 3797         | 3816       | AGAAUCUUGAUGAUGCUGCA    | UGCAGCAUCAUCAGGAUUCU    | Cleavage   |              | 1            |
| cme-miR172c       | PvAP2-ERF20  | 1,5         | 9,626  | 1           | 20        | 2530         | 2549       | AGAAUCUUGAUGAUGCUGCA    | UGCAGCAUCAUCAGGAUUCU    | Cleavage   |              | 1            |
| cme-miR172c       | PvAP2-ERF25  | 1,5         | 16,15  | 1           | 20        | 3064         | 3083       | AGAAUCUUGAUGAUGCUGCA    | UGCAGCAUCAUCAGGAUUCU    | Cleavage   |              | 1            |
| cme-miR172c       | PvAP2-ERF62  | 1,5         | 16,463 | 1           | 20        | 3200         | 3219       | AGAAUCUUGAUGAUGCUGCA    | UGCAGCAUCAUCAGGAUUCU    | Cleavage   |              | 1            |
| cme-miR172c       | PvAP2-ERF113 | 2,5         | 22,52  | 1           | 20        | 3572         | 3591       | AGAAUCUUGAUGAUGCUGCA    | AGCAGCAUCAUCAGGAUUCG    | Cleavage   |              | 1            |
| cme-miR172d       | PvAP2-ERF20  | 0,5         | 9,626  | 1           | 20        | 2530         | 2549       | GGAAUCUUGAUGAUGCUGCA    | UGCAGCAUCAUCAGGAUUCU    | Cleavage   |              | 1            |
| cme-miR172d       | PvAP2-ERF25  | 0,5         | 16,15  | 1           | 20        | 3064         | 3083       | GGAAUCUUGAUGAUGCUGCA    | UGCAGCAUCAUCAGGAUUCU    | Cleavage   |              | 1            |
| cme-miR172d       | PvAP2-ERF62  | 0,5         | 16,463 | 1           | 20        | 3200         | 3219       | GGAAUCUUGAUGAUGCUGCA    | UGCAGCAUCAUCAGGAUUCU    | Cleavage   |              | 1            |
| cme-miR172d       | PvAP2-ERF173 | 1           | 11,33  | 1           | 20        | 3656         | 3675       | GGAAUCUUGAUGAUGCUGCA    | UGCAGCAUCAUCAGGAUUCU    | Cleavage   |              | 1            |
| cme-miR172d       | PvAP2-ERF78  | 1           | 10,114 | 1           | 20        | 3797         | 3816       | GGAAUCUUGAUGAUGCUGCA    | UGCAGCAUCAUCAGGAUUCU    | Cleavage   |              | 1            |
| cme-miR172d       | PvAP2-ERF113 | 2,5         | 22,52  | 1           | 20        | 3572         | 3591       | GGAAUCUUGAUGAUGCUGCA    | AGCAGCAUCAUCAGGAUUCG    | Cleavage   |              | 1            |
| cme-miR172e       | PvAP2-ERF173 | 0,5         | 11,33  | 1           | 21        | 3655         | 3675       | AGAAUCUUGAUGAUGCUGCAG   | CUGCAGCAUCAUCAGGAUUCU   | Cleavage   |              | 1            |
| cme-miR172e       | PvAP2-ERF78  | 0,5         | 10,114 | 1           | 21        | 3796         | 3816       | AGAAUCUUGAUGAUGCUGCAG   | CUGCAGCAUCAUCAGGAUUCU   | Cleavage   |              | 1            |
| cme-miR172e       | PvAP2-ERF20  | 1,5         | 9,626  | 1           | 21        | 2529         | 2549       | AGAAUCUUGAUGAUGCUGCAG   | CUGCAGCAUCAUCAGGAUUCU   | Cleavage   |              | 1            |
| cme-miR172e       | PvAP2-ERF25  | 1,5         | 16,15  | 1           | 21        | 3063         | 3083       | AGAAUCUUGAUGAUGCUGCAG   | CUGCAGCAUCAUCAGGAUUCU   | Cleavage   |              | 1            |
| cme-miR172e       | PvAP2-ERF62  | 1,5         | 16,463 | 1           | 21        | 3199         | 3219       | AGAAUCUUGAUGAUGCUGCAG   | CUGCAGCAUCAUCAGGAUUCU   | Cleavage   |              | 1            |
| cme-miR172e       | PvAP2-ERF113 | 2,5         | 22,52  | 1           | 21        | 3571         | 3591       | AGAAUCUUGAUGAUGCUGCAG   | CAGCAGCAUCAUCAGGAUUCG   | Cleavage   |              | 1            |
| cme-miR172f       | PvAP2-ERF20  | 2,5         | 9,626  | 1           | 20        | 2530         | 2549       | UGAAUCUUGAUGAUGCUGCA    | UGCAGCAUCAUCAGGAUUCU    | Cleavage   |              | 1            |
| cme-miR172f       | PvAP2-ERF25  | 2,5         | 16,15  | 1           | 20        | 3064         | 3083       | UGAAUCUUGAUGAUGCUGCA    | UGCAGCAUCAUCAGGAUUCU    | Cleavage   |              | 1            |
| cme-miR172f       | PvAP2-ERF62  | 2,5         | 16,463 | 1           | 20        | 3200         | 3219       | UGAAUCUUGAUGAUGCUGCA    | UGCAGCAUCAUCAGGAUUCU    | Cleavage   |              | 1            |
| cme-miR172f       | PvAP2-ERF173 | 2,5         | 11,33  | 1           | 20        | 3656         | 3675       | UGAAUCUUGAUGAUGCUGCA    | UGCAGCAUCAUCAGGAUUCU    | Cleavage   |              | 1            |
| cme-miR172f       | PvAP2-ERF78  | 2,5         | 10,114 | 1           | 20        | 3797         | 3816       | UGAAUCUUGAUGAUGCUGCA    | UGCAGCAUCAUCAGGAUUCU    | Cleavage   |              | 1            |
| cme-miR172f       | PvAP2-ERF113 | 3           | 22,52  | 1           | 20        | 3572         | 3591       | UGAAUCUUGAUGAUGCUGCA    | AGCAGCAUCAUCAGGAUUCG    | Cleavage   |              | 1            |
| Carica papaya     |              |             |        |             |           |              |            |                         |                         |            |              |              |
| miRNA_Acc.        | Target_Acc.  | Expectation | UPE    | miRNA_start | miRNA_end | Target_start | Target_end | miRNA_aligned_fragment  | Target_aligned_fragment | Inhibition | Target_Desc. | Multiplicity |
| cpa-miR172a       | PvAP2-ERF20  | 0,5         | 9,638  | 1           | 21        | 2530         | 2550       | GGGAAUCUUGAUGAUGCUGCA   | UGCAGCAUCAUCAGGAUUCU    | Cleavage   |              | 1            |
| cpa-miR172a       | PvAP2-ERF25  | 0,5         | 16,19  | 1           | 21        | 3064         | 3084       | GGGAAUCUUGAUGAUGCUGCA   | UGCAGCAUCAUCAGGAUUCU    | Cleavage   |              | 1            |
| cpa-miR172a       | PvAP2-ERF62  | 0,5         | 17,808 | 1           | 21        | 3200         | 3220       | GGGAAUCUUGAUGAUGCUGCA   | UGCAGCAUCAUCAGGAUUCU    | Cleavage   |              | 1            |
| cpa-miR172a       | PvAP2-ERF173 | 1           | 11,277 | 1           | 21        | 3656         | 3676       | GGGAAUCUUGAUGAUGCUGCA   | UGCAGCAUCAUCAGGAUUCU    | Cleavage   |              | 1            |
| cpa-miR172a       | PvAP2-ERF78  | 1           | 7,512  | 1           | 21        | 3797         | 3817       | GGGAAUCUUGAUGAUGCUGCA   | UGCAGCAUCAUCAGGAUUCU    | Cleavage   |              | 1            |
| cpa-miR172a       | PvAP2-ERF113 | 3           | 20,11  | 1           | 20        | 3573         | 3592       | GGGAAUCUUGAUGAUGCUGC    | GCAGCAUCAUCAGGAUUCU     | Cleavage   |              | 1            |
| cpa-miR172b       | PvAP2-ERF20  | 0,5         | 9,638  | 1           | 21        | 2530         | 2550       | GGGAAUCUUGAUGAUGCUGCA   | UGCAGCAUCAUCAGGAUUCU    | Cleavage   |              | 1            |
| cpa-miR172b       | PvAP2-ERF25  | 0,5         | 16,19  | 1           | 21        | 3064         | 3084       | GGGAAUCUUGAUGAUGCUGCA   | UGCAGCAUCAUCAGGAUUCU    | Cleavage   |              | 1            |
| cpa-miR172b       | PvAP2-ERF62  | 0,5         | 17,808 | 1           | 21        | 3200         | 3220       | GGGAAUCUUGAUGAUGCUGCA   | UGCAGCAUCAUCAGGAUUCU    | Cleavage   |              | 1            |
| cpa-miR172b       | PvAP2-ERF173 | 1           | 11,277 | 1           | 21        | 3656         | 3676       | GGGAAUCUUGAUGAUGCUGCA   | UGCAGCAUCAUCAGGAUUCU    | Cleavage   |              | 1            |
| cpa-miR172b       | PvAP2-ERF78  | 1           | 7,512  | 1           | 21        | 3797         | 3817       | GGGAAUCUUGAUGAUGCUGCA   | UGCAGCAUCAUCAGGAUUCU    | Cleavage   |              | 1            |
| cpa-miR172b       | PvAP2-ERF113 | 3           | 20,11  | 1           | 20        | 3573         | 3592       | GGGAAUCUUGAUGAUGCUGC    | GCAGCAUCAUCAGGAUUCU     | Cleavage   |              | 1            |
| Citrus reticulata |              |             |        |             |           |              |            |                         |                         |            |              |              |
| miRNA_Acc.        | Target_Acc.  | Expectation | UPE    | miRNA_start | miRNA_end | Target_start | Target_end | miRNA_aligned_fragment  | Target_aligned_fragment | Inhibition | Target_Desc. | Multiplicity |
| cre-miR1171       | PvAP2-ERF171 | 2           | 9,458  | 1           | 23        | 130          | 152        | UGGAGUGGAGUGGAGUGGAGUGG | UCACUUCACUUCACUUCACUUC  | Cleavage   |              | 1            |

| Citrus sinensis          |              |             |        |             |           |              |            |                          |                         |             |              |              |
|--------------------------|--------------|-------------|--------|-------------|-----------|--------------|------------|--------------------------|-------------------------|-------------|--------------|--------------|
| miRNA_Acc.               | Target_Acc.  | Expectation | UPE    | miRNA_start | miRNA_end | Target_start | Target_end | miRNA_aligned_fragment   | Target_aligned_fragment | Inhibition  | Target_Desc. | Multiplicity |
| csi-miR172a-3p           | PvAP2-ERF173 | 0,5         | 11,33  | 1           | 20        | 3656         | 3675       | AGAAUCUUGAUGAUGCUGCA     | UGCAGCAUCAUCAGGAUUCU    | Cleavage    |              | 1            |
| csi-miR172a-3p           | PvAP2-ERF78  | 0,5         | 10,114 | 1           | 20        | 3797         | 3816       | AGAAUCUUGAUGAUGCUGCA     | UGCAGCAUCAUCAGGAUUCU    | Cleavage    |              | 1            |
| csi-miR172a-3p           | PvAP2-ERF20  | 1,5         | 9,626  | 1           | 20        | 2530         | 2549       | AGAAUCUUGAUGAUGCUGCA     | UGCAGCAUCAUCAGGAUUCU    | Cleavage    |              | 1            |
| csi-miR172a-3p           | PvAP2-ERF25  | 1,5         | 16,15  | 1           | 20        | 3064         | 3083       | AGAAUCUUGAUGAUGCUGCA     | UGCAGCAUCAUCAGGAUUCU    | Cleavage    |              | 1            |
| csi-miR172a-3p           | PvAP2-ERF62  | 1,5         | 16,463 | 1           | 20        | 3200         | 3219       | AGAAUCUUGAUGAUGCUGCA     | UGCAGCAUCAUCAGGAUUCU    | Cleavage    |              | 1            |
| csi-miR172a-3p           | PvAP2-ERF113 | 2,5         | 22,52  | 1           | 20        | 3572         | 3591       | AGAAUCUUGAUGAUGCUGCA     | AGCAGCAUCAUCAGGAUUCG    | Cleavage    |              | 1            |
| csi-miR172b              | PvAP2-ERF173 | 1,5         | 11,33  | 1           | 20        | 3656         | 3675       | AGAAUCUUGAUGAUGCUGCA     | UGCAGCAUCAUCAGGAUUCU    | Cleavage    |              | 1            |
| csi-miR172b              | PvAP2-ERF78  | 1,5         | 10,114 | 1           | 20        | 3797         | 3816       | AGAAUCUUGAUGAUGCUGCA     | UGCAGCAUCAUCAGGAUUCU    | Cleavage    |              | 1            |
| csi-miR172b              | PvAP2-ERF20  | 2,5         | 9,626  | 1           | 20        | 2530         | 2549       | AGAAUCUUGAUGAUGCUGCA     | UGCAGCAUCAUCAGGAUUCU    | Cleavage    |              | 1            |
| csi-miR172b              | PvAP2-ERF25  | 2,5         | 16,15  | 1           | 20        | 3064         | 3083       | AGAAUCUUGAUGAUGCUGCA     | UGCAGCAUCAUCAGGAUUCU    | Cleavage    |              | 1            |
| csi-miR172b              | PvAP2-ERF62  | 2,5         | 16,463 | 1           | 20        | 3200         | 3219       | AGAAUCUUGAUGAUGCUGCA     | UGCAGCAUCAUCAGGAUUCU    | Cleavage    |              | 1            |
| csi-miR172c              | PvAP2-ERF20  | 1,5         | 9,638  | 1           | 22        | 2529         | 2550       | UGGAAUCUUGAUGAUGCUGCAG   | CUGCAGCAUCAUCAGGAUUCU   | Cleavage    |              | 1            |
| csi-miR172c              | PvAP2-ERF25  | 1,5         | 16,19  | 1           | 22        | 3063         | 3084       | UGGAAUCUUGAUGAUGCUGCAG   | CUGCAGCAUCAUCAGGAUUCU   | Cleavage    |              | 1            |
| csi-miR172c              | PvAP2-ERF62  | 1,5         | 17,808 | 1           | 22        | 3199         | 3220       | UGGAAUCUUGAUGAUGCUGCAG   | CUGCAGCAUCAUCAGGAUUCU   | Cleavage    |              | 1            |
| csi-miR172c              | PvAP2-ERF173 | 2           | 11,277 | 1           | 22        | 3655         | 3676       | UGGAAUCUUGAUGAUGCUGCAG   | CUGCAGCAUCAUCAGGAUUCU   | Cleavage    |              | 1            |
| csi-miR172c              | PvAP2-ERF78  | 2           | 7,512  | 1           | 22        | 3796         | 3817       | UGGAAUCUUGAUGAUGCUGCAG   | CUGCAGCAUCAUCAGGAUUCU   | Cleavage    |              | 1            |
| csi-miR172c              | PvAP2-ERF113 | 3           | 20,11  | 1           | 22        | 3571         | 3592       | UGGAAUCUUGAUGAUGCUGCAG   | CAGCAGCAUCAUCAGGAUUCU   | Cleavage    |              | 1            |
| csi-miR3946              | PvAP2-ERF31  | 3           | 4,15   | 1           | 21        | 741          | 761        | UUGUAGAGAAAGAGAAGAGAG    | CUCUUUUUUUUUCUCCACAA    | Cleavage    |              | 1            |
| csi-miR3946              | PvAP2-ERF133 | 3           | 7,44   | 1           | 23        | 4887         | 4909       | UUGUAGAGAAAGAGAAGAGACA   | UUUUUUUUUUUUUUUUUUUACAA | Cleavage    |              | 1            |
| csi-miR3946              | PvAP2-ERF128 | 3           | 3,141  | 1           | 21        | 30           | 49         | UUGUAGAGAAAGAGAAGAGAG    | CUCUCUU-UCUCUCUCUACAA   | Translation |              | 1            |
| csi-miR3948              | PvAP2-ERF163 | 2,5         | 0,791  | 1           | 22        | 182          | 203        | UGGAGUGGGAGUGGGAGUAGGG   | CUCUACUCCACUCCACUUCU    | Cleavage    |              | 1            |
| csi-miR3948              | PvAP2-ERF10  | 3           | 1,147  | 1           | 24        | 18           | 40         | UGGAGUGGGAGUGGGAGUAGGGUG | CACUC-ACUCCACUCCACUUCU  | Cleavage    |              | 1            |
| csi-miR3948              | PvAP2-ERF36  | 3           | 1,201  | 1           | 24        | 196          | 219        | UGGAGUGGGAGUGGGAGUAGGGUG | CAACUACUCACACUCUCACACCA | Cleavage    |              | 1            |
| csi-miR3951              | PvAP2-ERF152 | 3           | 10,261 | 1           | 20        | 2518         | 2537       | UAGAUAAAGAUAGAGAAAA      | AUUUCUCUUGUUUUUUUUUA    | Cleavage    |              | 1            |
| Dictyostelium discoideum |              |             |        |             |           |              |            |                          |                         |             |              |              |
| miRNA_Acc.               | Target_Acc.  | Expectation | UPE    | miRNA_start | miRNA_end | Target_start | Target_end | miRNA_aligned_fragment   | Target_aligned_fragment | Inhibition  | Target_Desc. | Multiplicity |
| ddi-miR-7095-3p          | PvAP2-ERF32  | 2,5         | 13,389 | 1           | 20        | 3304         | 3323       | GGAUCUGUUAAAAUUGGAUA     | UAUUCAGUUUUGAUGAUAUCU   | Cleavage    |              | 1            |
| Digitalis purpurea       |              |             |        |             |           |              |            |                          |                         |             |              |              |
| miRNA_Acc.               | Target_Acc.  | Expectation | UPE    | miRNA_start | miRNA_end | Target_start | Target_end | miRNA_aligned_fragment   | Target_aligned_fragment | Inhibition  | Target_Desc. | Multiplicity |
| dpr-miR172a              | PvAP2-ERF173 | 0,5         | 11,33  | 1           | 20        | 3656         | 3675       | AGAAUCUUGAUGAUGCUGCA     | UGCAGCAUCAUCAGGAUUCU    | Cleavage    |              | 1            |
| dpr-miR172a              | PvAP2-ERF78  | 0,5         | 10,114 | 1           | 20        | 3797         | 3816       | AGAAUCUUGAUGAUGCUGCA     | UGCAGCAUCAUCAGGAUUCU    | Cleavage    |              | 1            |
| dpr-miR172a              | PvAP2-ERF20  | 1,5         | 9,626  | 1           | 20        | 2530         | 2549       | AGAAUCUUGAUGAUGCUGCA     | UGCAGCAUCAUCAGGAUUCU    | Cleavage    |              | 1            |
| dpr-miR172a              | PvAP2-ERF25  | 1,5         | 16,15  | 1           | 20        | 3064         | 3083       | AGAAUCUUGAUGAUGCUGCA     | UGCAGCAUCAUCAGGAUUCU    | Cleavage    |              | 1            |
| dpr-miR172a              | PvAP2-ERF62  | 1,5         | 16,463 | 1           | 20        | 3200         | 3219       | AGAAUCUUGAUGAUGCUGCA     | UGCAGCAUCAUCAGGAUUCU    | Cleavage    |              | 1            |
| dpr-miR172a              | PvAP2-ERF113 | 2,5         | 22,52  | 1           | 20        | 3572         | 3591       | AGAAUCUUGAUGAUGCUGCA     | AGCAGCAUCAUCAGGAUUCG    | Cleavage    |              | 1            |
| dpr-miR172b              | PvAP2-ERF173 | 0,5         | 11,33  | 1           | 20        | 3656         | 3675       | AGAAUCUUGAUGAUGCUGCA     | UGCAGCAUCAUCAGGAUUCU    | Cleavage    |              | 1            |
| dpr-miR172b              | PvAP2-ERF78  | 0,5         | 10,114 | 1           | 20        | 3797         | 3816       | AGAAUCUUGAUGAUGCUGCA     | UGCAGCAUCAUCAGGAUUCU    | Cleavage    |              | 1            |
| dpr-miR172b              | PvAP2-ERF20  | 1,5         | 9,626  | 1           | 20        | 2530         | 2549       | AGAAUCUUGAUGAUGCUGCA     | UGCAGCAUCAUCAGGAUUCU    | Cleavage    |              | 1            |
| dpr-miR172b              | PvAP2-ERF25  | 1,5         | 16,15  | 1           | 20        | 3064         | 3083       | AGAAUCUUGAUGAUGCUGCA     | UGCAGCAUCAUCAGGAUUCU    | Cleavage    |              | 1            |
| dpr-miR172b              | PvAP2-ERF62  | 1,5         | 16,463 | 1           | 20        | 3200         | 3219       | AGAAUCUUGAUGAUGCUGCA     | UGCAGCAUCAUCAGGAUUCU    | Cleavage    |              | 1            |
| dpr-miR172b              | PvAP2-ERF113 | 2,5         | 22,52  | 1           | 20        | 3572         | 3591       | AGAAUCUUGAUGAUGCUGCA     | AGCAGCAUCAUCAGGAUUCG    | Cleavage    |              | 1            |
| Elaeis guineensis        |              |             |        |             |           |              |            |                          |                         |             |              |              |
| miRNA_Acc.               | Target_Acc.  | Expectation | UPE    | miRNA_start | miRNA_end | Target_start | Target_end | miRNA_aligned_fragment   | Target_aligned_fragment | Inhibition  | Target_Desc. | Multiplicity |
| egu-miR172a              | PvAP2-ERF173 | 0,5         | 11,33  | 1           | 20        | 3656         | 3675       | AGAAUCUUGAUGAUGCUGCA     | UGCAGCAUCAUCAGGAUUCU    | Cleavage    |              | 1            |
| egu-miR172a              | PvAP2-ERF78  | 0,5         | 10,114 | 1           | 20        | 3797         | 3816       | AGAAUCUUGAUGAUGCUGCA     | UGCAGCAUCAUCAGGAUUCU    | Cleavage    |              | 1            |
| egu-miR172a              | PvAP2-ERF20  | 1,5         | 9,626  | 1           | 20        | 2530         | 2549       | AGAAUCUUGAUGAUGCUGCA     | UGCAGCAUCAUCAGGAUUCU    | Cleavage    |              | 1            |
| egu-miR172a              | PvAP2-ERF25  | 1,5         | 16,15  | 1           | 20        | 3064         | 3083       | AGAAUCUUGAUGAUGCUGCA     | UGCAGCAUCAUCAGGAUUCU    | Cleavage    |              | 1            |
| egu-miR172a              | PvAP2-ERF62  | 1,5         | 16,463 | 1           | 20        | 3200         | 3219       | AGAAUCUUGAUGAUGCUGCA     | UGCAGCAUCAUCAGGAUUCU    | Cleavage    |              | 1            |
| egu-miR172a              | PvAP2-ERF113 | 2,5         | 22,52  | 1           | 20        | 3572         | 3591       | AGAAUCUUGAUGAUGCUGCA     | AGCAGCAUCAUCAGGAUUCG    | Cleavage    |              | 1            |
| egu-miR172b              | PvAP2-ERF173 | 0,5         | 11,33  | 1           | 20        | 3656         | 3675       | AGAAUCUUGAUGAUGCUGCA     | UGCAGCAUCAUCAGGAUUCU    | Cleavage    |              | 1            |
| egu-miR172b              | PvAP2-ERF78  | 0,5         | 10,114 | 1           | 20        | 3797         | 3816       | AGAAUCUUGAUGAUGCUGCA     | UGCAGCAUCAUCAGGAUUCU    | Cleavage    |              | 1            |
| egu-miR172b              | PvAP2-ERF20  | 1,5         | 9,626  | 1           | 20        | 2530         | 2549       | AGAAUCUUGAUGAUGCUGCA     | UGCAGCAUCAUCAGGAUUCU    | Cleavage    |              | 1            |
| egu-miR172b              | PvAP2-ERF25  | 1,5         | 16,15  | 1           | 20        | 3064         | 3083       | AGAAUCUUGAUGAUGCUGCA     | UGCAGCAUCAUCAGGAUUCU    | Cleavage    |              | 1            |

|             |              |     |        |   |    |      |      |                      |                      |          |   |
|-------------|--------------|-----|--------|---|----|------|------|----------------------|----------------------|----------|---|
| egu-miR172b | PvAP2-ERF62  | 1,5 | 16,463 | 1 | 20 | 3200 | 3219 | AGAAUCUUGAUGAUGCUGCA | UGCAGCAUCAUCAGGAUUC  | Cleavage | 1 |
| egu-miR172b | PvAP2-ERF113 | 2,5 | 22,52  | 1 | 20 | 3572 | 3591 | AGAAUCUUGAUGAUGCUGCA | AGCAGCAUCAUCAGGAUUCG | Cleavage | 1 |
| egu-miR172c | PvAP2-ERF173 | 0,5 | 11,33  | 1 | 20 | 3656 | 3675 | AGAAUCUUGAUGAUGCUGCA | UGCAGCAUCAUCAGGAUUCU | Cleavage | 1 |
| egu-miR172c | PvAP2-ERF78  | 0,5 | 10,114 | 1 | 20 | 3797 | 3816 | AGAAUCUUGAUGAUGCUGCA | UGCAGCAUCAUCAGGAUUCU | Cleavage | 1 |
| egu-miR172c | PvAP2-ERF20  | 1,5 | 9,626  | 1 | 20 | 2530 | 2549 | AGAAUCUUGAUGAUGCUGCA | UGCAGCAUCAUCAGGAUUC  | Cleavage | 1 |
| egu-miR172c | PvAP2-ERF25  | 1,5 | 16,15  | 1 | 20 | 3064 | 3083 | AGAAUCUUGAUGAUGCUGCA | UGCAGCAUCAUCAGGAUUC  | Cleavage | 1 |
| egu-miR172c | PvAP2-ERF62  | 1,5 | 16,463 | 1 | 20 | 3200 | 3219 | AGAAUCUUGAUGAUGCUGCA | UGCAGCAUCAUCAGGAUUC  | Cleavage | 1 |
| egu-miR172c | PvAP2-ERF113 | 2,5 | 22,52  | 1 | 20 | 3572 | 3591 | AGAAUCUUGAUGAUGCUGCA | AGCAGCAUCAUCAGGAUUCG | Cleavage | 1 |
| egu-miR172d | PvAP2-ERF20  | 1,5 | 9,626  | 1 | 20 | 2530 | 2549 | UGAAUCUUGAUGAUGCUGCA | UGCAGCAUCAUCAGGAUUC  | Cleavage | 1 |
| egu-miR172d | PvAP2-ERF25  | 1,5 | 16,15  | 1 | 20 | 3064 | 3083 | UGAAUCUUGAUGAUGCUGCA | UGCAGCAUCAUCAGGAUUC  | Cleavage | 1 |
| egu-miR172d | PvAP2-ERF62  | 1,5 | 16,463 | 1 | 20 | 3200 | 3219 | UGAAUCUUGAUGAUGCUGCA | UGCAGCAUCAUCAGGAUUC  | Cleavage | 1 |
| egu-miR172d | PvAP2-ERF173 | 1,5 | 11,33  | 1 | 20 | 3656 | 3675 | UGAAUCUUGAUGAUGCUGCA | UGCAGCAUCAUCAGGAUUCU | Cleavage | 1 |
| egu-miR172d | PvAP2-ERF78  | 1,5 | 10,114 | 1 | 20 | 3797 | 3816 | UGAAUCUUGAUGAUGCUGCA | UGCAGCAUCAUCAGGAUUCU | Cleavage | 1 |
| egu-miR172d | PvAP2-ERF113 | 2   | 22,52  | 1 | 20 | 3572 | 3591 | UGAAUCUUGAUGAUGCUGCA | AGCAGCAUCAUCAGGAUUCG | Cleavage | 1 |
| egu-miR172e | PvAP2-ERF20  | 1,5 | 9,626  | 1 | 20 | 2530 | 2549 | UGAAUCUUGAUGAUGCUGCA | UGCAGCAUCAUCAGGAUUC  | Cleavage | 1 |
| egu-miR172e | PvAP2-ERF25  | 1,5 | 16,15  | 1 | 20 | 3064 | 3083 | UGAAUCUUGAUGAUGCUGCA | UGCAGCAUCAUCAGGAUUC  | Cleavage | 1 |
| egu-miR172e | PvAP2-ERF62  | 1,5 | 16,463 | 1 | 20 | 3200 | 3219 | UGAAUCUUGAUGAUGCUGCA | UGCAGCAUCAUCAGGAUUC  | Cleavage | 1 |
| egu-miR172e | PvAP2-ERF173 | 1,5 | 11,33  | 1 | 20 | 3656 | 3675 | UGAAUCUUGAUGAUGCUGCA | UGCAGCAUCAUCAGGAUUCU | Cleavage | 1 |
| egu-miR172e | PvAP2-ERF78  | 1,5 | 10,114 | 1 | 20 | 3797 | 3816 | UGAAUCUUGAUGAUGCUGCA | UGCAGCAUCAUCAGGAUUCU | Cleavage | 1 |
| egu-miR172e | PvAP2-ERF113 | 2   | 22,52  | 1 | 20 | 3572 | 3591 | UGAAUCUUGAUGAUGCUGCA | AGCAGCAUCAUCAGGAUUCG | Cleavage | 1 |
| egu-miR172f | PvAP2-ERF78  | 1,5 | 10,114 | 1 | 20 | 3797 | 3816 | UGAAUCUUGAUGAUGCUGCA | UGCAGCAUCAUCAGGAUUCU | Cleavage | 1 |
| egu-miR172f | PvAP2-ERF173 | 1,5 | 11,33  | 1 | 20 | 3656 | 3675 | UGAAUCUUGAUGAUGCUGCA | UGCAGCAUCAUCAGGAUUCU | Cleavage | 1 |
| egu-miR172f | PvAP2-ERF62  | 1,5 | 16,463 | 1 | 20 | 3200 | 3219 | UGAAUCUUGAUGAUGCUGCA | UGCAGCAUCAUCAGGAUUC  | Cleavage | 1 |
| egu-miR172f | PvAP2-ERF25  | 1,5 | 16,15  | 1 | 20 | 3064 | 3083 | UGAAUCUUGAUGAUGCUGCA | UGCAGCAUCAUCAGGAUUC  | Cleavage | 1 |
| egu-miR172f | PvAP2-ERF20  | 1,5 | 9,626  | 1 | 20 | 2530 | 2549 | UGAAUCUUGAUGAUGCUGCA | UGCAGCAUCAUCAGGAUUC  | Cleavage | 1 |
| egu-miR172f | PvAP2-ERF113 | 2   | 22,52  | 1 | 20 | 3572 | 3591 | UGAAUCUUGAUGAUGCUGCA | AGCAGCAUCAUCAGGAUUCG | Cleavage | 1 |

**Ectocarpus siliculosus**

| miRNA_Acc.     | Target_Acc.  | Expectation | UPE   | miRNA_start | miRNA_end | Target_start | Target_end | miRNA_aligned_fragment | Target_aligned_fragment | Inhibition | Target_Desc. | Multiplicity |
|----------------|--------------|-------------|-------|-------------|-----------|--------------|------------|------------------------|-------------------------|------------|--------------|--------------|
| esi-miR3463-5p | PvAP2-ERF150 | 3           | 8,131 | 1           | 20        | 1663         | 1682       | UCAUUGCUGGUGCUGGUUGG   | UCAACCACCACUAGCAAUGA    | Cleavage   |              | 1            |

**Festuca arundinacea**

| miRNA_Acc.  | Target_Acc. | Expectation | UPE    | miRNA_start | miRNA_end | Target_start | Target_end | miRNA_aligned_fragment | Target_aligned_fragment | Inhibition | Target_Desc. | Multiplicity |
|-------------|-------------|-------------|--------|-------------|-----------|--------------|------------|------------------------|-------------------------|------------|--------------|--------------|
| far-miR1134 | PvAP2-ERF5  | 3           | 12,992 | 1           | 20        | 491          | 510        | CGACAACAACAAGAAGA      | UUGUCUUGUUGUUGUUGUUU    | Cleavage   |              | 1            |
| far-miR529  | PvAP2-ERF91 | 3           | 6,596  | 1           | 20        | 307          | 326        | AGAAGAGAGAGACACAGCU    | AUCUAUGCUCUUUUUUUCU     | Cleavage   |              | 1            |

**Gossypium hirsutum**

| miRNA_Acc.   | Target_Acc.  | Expectation | UPE    | miRNA_start | miRNA_end | Target_start | Target_end | miRNA_aligned_fragment | Target_aligned_fragment | Inhibition  | Target_Desc. | Multiplicity |
|--------------|--------------|-------------|--------|-------------|-----------|--------------|------------|------------------------|-------------------------|-------------|--------------|--------------|
| ghr-miR172   | PvAP2-ERF173 | 0           | 11,33  | 1           | 21        | 3655         | 3675       | AGAAUCCUGAUGAUGCUGCAG  | CUGCAGCAUCAUCAGGAUUCU   | Cleavage    |              | 1            |
| ghr-miR172   | PvAP2-ERF78  | 0           | 10,114 | 1           | 21        | 3796         | 3816       | AGAAUCCUGAUGAUGCUGCAG  | CUGCAGCAUCAUCAGGAUUCU   | Cleavage    |              | 1            |
| ghr-miR172   | PvAP2-ERF20  | 1           | 9,626  | 1           | 21        | 2529         | 2549       | AGAAUCCUGAUGAUGCUGCAG  | CUGCAGCAUCAUCAGGAUUC    | Cleavage    |              | 1            |
| ghr-miR172   | PvAP2-ERF25  | 1           | 16,15  | 1           | 21        | 3063         | 3083       | AGAAUCCUGAUGAUGCUGCAG  | CUGCAGCAUCAUCAGGAUUC    | Cleavage    |              | 1            |
| ghr-miR172   | PvAP2-ERF62  | 1           | 16,463 | 1           | 21        | 3199         | 3219       | AGAAUCCUGAUGAUGCUGCAG  | CUGCAGCAUCAUCAGGAUUC    | Cleavage    |              | 1            |
| ghr-miR172   | PvAP2-ERF113 | 2           | 22,52  | 1           | 21        | 3571         | 3591       | AGAAUCCUGAUGAUGCUGCAG  | CAGCAGCAUCAUCAGGAUUCG   | Cleavage    |              | 1            |
| ghr-miR7484a | PvAP2-ERF113 | 3           | 13,986 | 1           | 21        | 2931         | 2951       | UUUGUAUUUAGAUAAGAG     | UUUUUUGAUUAGUAUUAUAAA   | Translation |              | 1            |
| ghr-miR7484b | PvAP2-ERF113 | 3           | 13,986 | 1           | 21        | 2931         | 2951       | UUUGUAUUUAGAUAAGAG     | UUUUUUGAUUAGUAUUAUAAA   | Translation |              | 1            |
| ghr-miR7510a | PvAP2-ERF10  | 3           | 16,85  | 1           | 21        | 1060         | 1080       | AAGGUCAGAUUUUAGCGGC    | GCUGCUAGGCUUAGUAUCU     | Translation |              | 1            |

**Glycine max**

| miRNA_Acc.      | Target_Acc.  | Expectation | UPE    | miRNA_start | miRNA_end | Target_start | Target_end | miRNA_aligned_fragment | Target_aligned_fragment | Inhibition  | Target_Desc. | Multiplicity |
|-----------------|--------------|-------------|--------|-------------|-----------|--------------|------------|------------------------|-------------------------|-------------|--------------|--------------|
| gma-miR1507c-5p | PvAP2-ERF114 | 2,5         | 17,551 | 1           | 20        | 28           | 47         | GAGGUGUUUGGGAUGAGAGA   | UUUUGCAUCCAAACACCUU     | Cleavage    |              | 1            |
| gma-miR1525     | PvAP2-ERF32  | 3           | 10,22  | 1           | 21        | 2634         | 2654       | UGGUGUAAUUUAGUUUUUAGU  | GUUAAAAUUUUUUAUAAACUG   | Translation |              | 1            |
| gma-miR156p     | PvAP2-ERF113 | 3           | 12,404 | 1           | 20        | 2612         | 2631       | UUGACAGAAGAAAGGGAGCA   | UGUUUUUUUUUAUUGUCA      | Cleavage    |              | 1            |
| gma-miR156t     | PvAP2-ERF113 | 3           | 12,404 | 1           | 20        | 2612         | 2631       | UUGACAGAAGAAAGGGAGCA   | UGUUUUUUUUUAUUGUCA      | Cleavage    |              | 1            |
| gma-miR172a     | PvAP2-ERF173 | 0,5         | 11,33  | 1           | 20        | 3656         | 3675       | AGAAUCUUGAUGAUGCUGCA   | UGCAGCAUCAUCAGGAUUCU    | Cleavage    |              | 1            |
| gma-miR172a     | PvAP2-ERF78  | 0,5         | 10,114 | 1           | 20        | 3797         | 3816       | AGAAUCUUGAUGAUGCUGCA   | UGCAGCAUCAUCAGGAUUCU    | Cleavage    |              | 1            |
| gma-miR172a     | PvAP2-ERF20  | 1,5         | 9,626  | 1           | 20        | 2530         | 2549       | AGAAUCUUGAUGAUGCUGCA   | UGCAGCAUCAUCAGGAUUC     | Cleavage    |              | 1            |
| gma-miR172a     | PvAP2-ERF25  | 1,5         | 16,15  | 1           | 20        | 3064         | 3083       | AGAAUCUUGAUGAUGCUGCA   | UGCAGCAUCAUCAGGAUUC     | Cleavage    |              | 1            |
| gma-miR172a     | PvAP2-ERF62  | 1,5         | 16,463 | 1           | 20        | 3200         | 3219       | AGAAUCUUGAUGAUGCUGCA   | UGCAGCAUCAUCAGGAUUC     | Cleavage    |              | 1            |



|              |              |     |        |   |    |      |      |                        |                        |             |   |
|--------------|--------------|-----|--------|---|----|------|------|------------------------|------------------------|-------------|---|
| gma-miR4393b | PvAP2-ERF150 | 3   | 9,956  | 1 | 20 | 628  | 647  | UUGAAAAGGGACAGCAGAGA   | UUUAGGCUGUCCUUUUUAA    | Cleavage    | 1 |
| gma-miR4400  | PvAP2-ERF120 | 3   | 17,994 | 1 | 21 | 4619 | 4639 | UUCGGAAAAUUUCUGAAGAC   | GUUGUCCACAAUUUUUCUGAA  | Cleavage    | 1 |
| gma-miR4407  | PvAP2-ERF27  | 3   | 24,702 | 1 | 20 | 30   | 49   | CAGAGGAAGCAGCACUUGUA   | UGUUGGUGCUCUUCUUCUG    | Cleavage    | 1 |
| gma-miR4407  | PVERF3       | 3   | 19,389 | 1 | 20 | 3713 | 3732 | CAGAGGAAGCAGCACUUGUA   | UAGAGGUUCUGUUUCUCUG    | Cleavage    | 1 |
| gma-miR4993  | PvAP2-ERF73  | 2,5 | 12,57  | 1 | 20 | 569  | 588  | GAGCGCGCGGGGAGGGAU     | CUCGCCGCCGCCGCCGUC     | Cleavage    | 1 |
| gma-miR5772  | PvAP2-ERF152 | 3   | 8,682  | 1 | 22 | 3288 | 3309 | AGAAUGUGAGUUAGAGUGAGCA | UGUACACUCUAAACACAUUUU  | Translation | 1 |
| gma-miR5779  | PvAP2-ERF152 | 3   | 15,076 | 1 | 22 | 495  | 516  | CAAGUCCAAAGUAGGAAUGUUG | UAACGUUUUUCCUUUGGAUUUG | Cleavage    | 1 |

**Hevea brasiliensis**

| miRNA_Acc.  | Target_Acc.  | Expectation | UPE    | miRNA_start | miRNA_end | Target_start | Target_end | miRNA_aligned_fragment | Target_aligned_fragment | Inhibition  | Target_Desc. | Multiplicity |
|-------------|--------------|-------------|--------|-------------|-----------|--------------|------------|------------------------|-------------------------|-------------|--------------|--------------|
| hbr-miR2118 | PvAP2-ERF41  | 3           | 11,857 | 1           | 20        | 868          | 887        | GAAUUGGGUGGAGUGGAGUG   | CACCACCAACCACCAUUUC     | Cleavage    |              | 1            |
| hbr-miR6170 | PvAP2-ERF79  | 2           | 9,297  | 1           | 20        | 124          | 143        | CAAGAAACAGAAGAGAGGGA   | UCUCUCUUUUUUUUUCUUG     | Cleavage    |              | 1            |
| hbr-miR6170 | PvAP2-ERF139 | 3           | 13,475 | 1           | 21        | 210          | 230        | CAAGAAACAGAAGAGAGGGAU  | GUCUCUGUUUUUUUUUCUUG    | Cleavage    |              | 1            |
| hbr-miR6170 | PvAP2-ERF62  | 3           | 14,847 | 1           | 20        | 1255         | 1274       | CAAGAAACAGAAGAGAGGGA   | UUUUUUUUUUUGUUUUUUUG    | Translation |              | 1            |
| hbr-miR6170 | PvAP2-ERF133 | 2,5         | 1,829  | 1           | 20        | 5667         | 5686       | CAAGAAACAGAAGAGAGGGA   | UCAUUUCUUCUGUUUCUUG     | Cleavage    |              | 1            |

**Heliconius melpomene**

| miRNA_Acc. | Target_Acc.  | Expectation | UPE    | miRNA_start | miRNA_end | Target_start | Target_end | miRNA_aligned_fragment | Target_aligned_fragment | Inhibition | Target_Desc. | Multiplicity |
|------------|--------------|-------------|--------|-------------|-----------|--------------|------------|------------------------|-------------------------|------------|--------------|--------------|
| hme-miR-14 | PvAP2-ERF61  | 3           | 9,927  | 1           | 20        | 31           | 50         | UCAGUCUUUUUCUCUCUCCU   | AGGAGAGGGAAGAGGGUGA     | Cleavage   |              | 1            |
| hme-miR-71 | PvAP2-ERF147 | 3           | 17,578 | 1           | 21        | 371          | 391        | UCUCACUACCUUGUCUUUCAU  | AGGAAAUACAAGGGAGUGAGA   | Cleavage   |              | 1            |

**Lotus japonicus**

| miRNA_Acc.   | Target_Acc.  | Expectation | UPE    | miRNA_start | miRNA_end | Target_start | Target_end | miRNA_aligned_fragment | Target_aligned_fragment | Inhibition | Target_Desc. | Multiplicity |
|--------------|--------------|-------------|--------|-------------|-----------|--------------|------------|------------------------|-------------------------|------------|--------------|--------------|
| lja-miR172a  | PvAP2-ERF173 | 0,5         | 11,33  | 1           | 21        | 3655         | 3675       | AGAAUCUUGAUGAUGCUGCAG  | CUGCAGCAUCAUCAGGAUUUCU  | Cleavage   |              | 1            |
| lja-miR172a  | PvAP2-ERF78  | 0,5         | 10,114 | 1           | 21        | 3796         | 3816       | AGAAUCUUGAUGAUGCUGCAG  | CUGCAGCAUCAUCAGGAUUUCU  | Cleavage   |              | 1            |
| lja-miR172a  | PvAP2-ERF20  | 1,5         | 9,626  | 1           | 21        | 2529         | 2549       | AGAAUCUUGAUGAUGCUGCAG  | CUGCAGCAUCAUCAGGAUUCC   | Cleavage   |              | 1            |
| lja-miR172a  | PvAP2-ERF25  | 1,5         | 16,15  | 1           | 21        | 3063         | 3083       | AGAAUCUUGAUGAUGCUGCAG  | CUGCAGCAUCAUCAGGAUUCC   | Cleavage   |              | 1            |
| lja-miR172a  | PvAP2-ERF62  | 1,5         | 16,463 | 1           | 21        | 3199         | 3219       | AGAAUCUUGAUGAUGCUGCAG  | CUGCAGCAUCAUCAGGAUUCC   | Cleavage   |              | 1            |
| lja-miR172a  | PvAP2-ERF113 | 2,5         | 22,52  | 1           | 21        | 3571         | 3591       | AGAAUCUUGAUGAUGCUGCAG  | CAGCAGCAUCAUCAGGAUUCG   | Cleavage   |              | 1            |
| lja-miR172b  | PvAP2-ERF173 | 0,5         | 11,33  | 1           | 20        | 3656         | 3675       | AGAAUCUUGAUGAUGCUGCA   | UGCAGCAUCAUCAGGAUUUCU   | Cleavage   |              | 1            |
| lja-miR172b  | PvAP2-ERF78  | 0,5         | 10,114 | 1           | 20        | 3797         | 3816       | AGAAUCUUGAUGAUGCUGCA   | UGCAGCAUCAUCAGGAUUUCU   | Cleavage   |              | 1            |
| lja-miR172b  | PvAP2-ERF20  | 1,5         | 9,626  | 1           | 20        | 2530         | 2549       | AGAAUCUUGAUGAUGCUGCA   | UGCAGCAUCAUCAGGAUUCC    | Cleavage   |              | 1            |
| lja-miR172b  | PvAP2-ERF25  | 1,5         | 16,15  | 1           | 20        | 3064         | 3083       | AGAAUCUUGAUGAUGCUGCA   | UGCAGCAUCAUCAGGAUUCC    | Cleavage   |              | 1            |
| lja-miR172b  | PvAP2-ERF62  | 1,5         | 16,463 | 1           | 20        | 3200         | 3219       | AGAAUCUUGAUGAUGCUGCA   | UGCAGCAUCAUCAGGAUUCC    | Cleavage   |              | 1            |
| lja-miR172b  | PvAP2-ERF113 | 2,5         | 22,52  | 1           | 20        | 3572         | 3591       | AGAAUCUUGAUGAUGCUGCA   | AGCAGCAUCAUCAGGAUUCG    | Cleavage   |              | 1            |
| lja-miR172c  | PvAP2-ERF78  | 0,5         | 10,114 | 1           | 20        | 3797         | 3816       | AGAAUCUUGAUGAUGCUGCA   | UGCAGCAUCAUCAGGAUUUCU   | Cleavage   |              | 1            |
| lja-miR172c  | PvAP2-ERF173 | 0,5         | 11,33  | 1           | 20        | 3656         | 3675       | AGAAUCUUGAUGAUGCUGCA   | UGCAGCAUCAUCAGGAUUUCU   | Cleavage   |              | 1            |
| lja-miR172c  | PvAP2-ERF62  | 1,5         | 16,463 | 1           | 20        | 3200         | 3219       | AGAAUCUUGAUGAUGCUGCA   | UGCAGCAUCAUCAGGAUUCC    | Cleavage   |              | 1            |
| lja-miR172c  | PvAP2-ERF25  | 1,5         | 16,15  | 1           | 20        | 3064         | 3083       | AGAAUCUUGAUGAUGCUGCA   | UGCAGCAUCAUCAGGAUUCC    | Cleavage   |              | 1            |
| lja-miR172c  | PvAP2-ERF20  | 1,5         | 9,626  | 1           | 20        | 2530         | 2549       | AGAAUCUUGAUGAUGCUGCA   | UGCAGCAUCAUCAGGAUUCC    | Cleavage   |              | 1            |
| lja-miR172c  | PvAP2-ERF113 | 2,5         | 22,52  | 1           | 20        | 3572         | 3591       | AGAAUCUUGAUGAUGCUGCA   | AGCAGCAUCAUCAGGAUUCG    | Cleavage   |              | 1            |
| lja-miR7530  | PvAP2-ERF62  | 3           | 10,441 | 1           | 21        | 56           | 76         | CCUUCUCUCUUCACUAUCUU   | GAGAGAGAGAAGAAAGGAAGG   | Cleavage   |              | 1            |
| lja-miR7533a | PvAP2-ERF77  | 3           | 5,714  | 1           | 21        | 361          | 381        | GAGGGGAUGGAGAGAAGCUGG  | UCAGCUUCUCUUCUCCCAUC    | Cleavage   |              | 1            |
| lja-miR7533b | PvAP2-ERF77  | 3           | 5,714  | 1           | 21        | 361          | 381        | GAGGGGAUGGAGAGAAGCUGG  | UCAGCUUCUCUUCUCCCAUC    | Cleavage   |              | 1            |

**Malus domestica**

| miRNA_Acc.  | Target_Acc.  | Expectation | UPE    | miRNA_start | miRNA_end | Target_start | Target_end | miRNA_aligned_fragment | Target_aligned_fragment | Inhibition | Target_Desc. | Multiplicity |
|-------------|--------------|-------------|--------|-------------|-----------|--------------|------------|------------------------|-------------------------|------------|--------------|--------------|
| mdm-miR172a | PvAP2-ERF173 | 0,5         | 11,33  | 1           | 20        | 3656         | 3675       | AGAAUCUUGAUGAUGCUGCA   | UGCAGCAUCAUCAGGAUUUCU   | Cleavage   |              | 1            |
| mdm-miR172a | PvAP2-ERF78  | 0,5         | 10,114 | 1           | 20        | 3797         | 3816       | AGAAUCUUGAUGAUGCUGCA   | UGCAGCAUCAUCAGGAUUUCU   | Cleavage   |              | 1            |
| mdm-miR172a | PvAP2-ERF20  | 1,5         | 9,626  | 1           | 20        | 2530         | 2549       | AGAAUCUUGAUGAUGCUGCA   | UGCAGCAUCAUCAGGAUUCC    | Cleavage   |              | 1            |
| mdm-miR172a | PvAP2-ERF25  | 1,5         | 16,15  | 1           | 20        | 3064         | 3083       | AGAAUCUUGAUGAUGCUGCA   | UGCAGCAUCAUCAGGAUUCC    | Cleavage   |              | 1            |
| mdm-miR172a | PvAP2-ERF62  | 1,5         | 16,463 | 1           | 20        | 3200         | 3219       | AGAAUCUUGAUGAUGCUGCA   | UGCAGCAUCAUCAGGAUUCC    | Cleavage   |              | 1            |
| mdm-miR172a | PvAP2-ERF113 | 2,5         | 22,52  | 1           | 20        | 3572         | 3591       | AGAAUCUUGAUGAUGCUGCA   | AGCAGCAUCAUCAGGAUUCG    | Cleavage   |              | 1            |
| mdm-miR172b | PvAP2-ERF173 | 0,5         | 11,33  | 1           | 20        | 3656         | 3675       | AGAAUCUUGAUGAUGCUGCA   | UGCAGCAUCAUCAGGAUUUCU   | Cleavage   |              | 1            |
| mdm-miR172b | PvAP2-ERF78  | 0,5         | 10,114 | 1           | 20        | 3797         | 3816       | AGAAUCUUGAUGAUGCUGCA   | UGCAGCAUCAUCAGGAUUUCU   | Cleavage   |              | 1            |
| mdm-miR172b | PvAP2-ERF20  | 1,5         | 9,626  | 1           | 20        | 2530         | 2549       | AGAAUCUUGAUGAUGCUGCA   | UGCAGCAUCAUCAGGAUUCC    | Cleavage   |              | 1            |
| mdm-miR172b | PvAP2-ERF25  | 1,5         | 16,15  | 1           | 20        | 3064         | 3083       | AGAAUCUUGAUGAUGCUGCA   | UGCAGCAUCAUCAGGAUUCC    | Cleavage   |              | 1            |
| mdm-miR172b | PvAP2-ERF62  | 1,5         | 16,463 | 1           | 20        | 3200         | 3219       | AGAAUCUUGAUGAUGCUGCA   | UGCAGCAUCAUCAGGAUUCC    | Cleavage   |              | 1            |
| mdm-miR172b | PvAP2-ERF113 | 2,5         | 22,52  | 1           | 20        | 3572         | 3591       | AGAAUCUUGAUGAUGCUGCA   | AGCAGCAUCAUCAGGAUUCG    | Cleavage   |              | 1            |



|             |              |     |        |   |    |      |      |                       |                       |          |   |
|-------------|--------------|-----|--------|---|----|------|------|-----------------------|-----------------------|----------|---|
| mdm-miR172l | PvAP2-ERF25  | 0,5 | 16,15  | 1 | 21 | 3063 | 3083 | GGAUUCUUGAUGAUGCUGCAG | CUGCAGCAUCAUCAGGAUUC  | Cleavage | 1 |
| mdm-miR172l | PvAP2-ERF62  | 0,5 | 16,463 | 1 | 21 | 3199 | 3219 | GGAUUCUUGAUGAUGCUGCAG | CUGCAGCAUCAUCAGGAUUC  | Cleavage | 1 |
| mdm-miR172l | PvAP2-ERF173 | 1   | 11,33  | 1 | 21 | 3655 | 3675 | GGAUUCUUGAUGAUGCUGCAG | CUGCAGCAUCAUCAGGAUUCU | Cleavage | 1 |
| mdm-miR172l | PvAP2-ERF78  | 1   | 10,114 | 1 | 21 | 3796 | 3816 | GGAUUCUUGAUGAUGCUGCAG | CUGCAGCAUCAUCAGGAUUC  | Cleavage | 1 |
| mdm-miR172l | PvAP2-ERF113 | 2,5 | 22,52  | 1 | 21 | 3571 | 3591 | GGAUUCUUGAUGAUGCUGCAG | CAGCAGCAUCAUCAGGAUUCG | Cleavage | 1 |
| mdm-miR172m | PvAP2-ERF173 | 0,5 | 11,33  | 1 | 21 | 3655 | 3675 | AGAAUCUUGAUGAUGCUGCAG | CUGCAGCAUCAUCAGGAUUCU | Cleavage | 1 |
| mdm-miR172m | PvAP2-ERF78  | 0,5 | 10,114 | 1 | 21 | 3796 | 3816 | AGAAUCUUGAUGAUGCUGCAG | CUGCAGCAUCAUCAGGAUUCU | Cleavage | 1 |
| mdm-miR172m | PvAP2-ERF20  | 1,5 | 9,626  | 1 | 21 | 2529 | 2549 | AGAAUCUUGAUGAUGCUGCAG | CUGCAGCAUCAUCAGGAUUC  | Cleavage | 1 |
| mdm-miR172m | PvAP2-ERF25  | 1,5 | 16,15  | 1 | 21 | 3063 | 3083 | AGAAUCUUGAUGAUGCUGCAG | CUGCAGCAUCAUCAGGAUUC  | Cleavage | 1 |
| mdm-miR172m | PvAP2-ERF62  | 1,5 | 16,463 | 1 | 21 | 3199 | 3219 | AGAAUCUUGAUGAUGCUGCAG | CUGCAGCAUCAUCAGGAUUC  | Cleavage | 1 |
| mdm-miR172m | PvAP2-ERF113 | 2,5 | 22,52  | 1 | 21 | 3571 | 3591 | AGAAUCUUGAUGAUGCUGCAG | CAGCAGCAUCAUCAGGAUUCG | Cleavage | 1 |
| mdm-miR172n | PvAP2-ERF173 | 0,5 | 11,33  | 1 | 21 | 3655 | 3675 | AGAAUCUUGAUGAUGCUGCAG | CUGCAGCAUCAUCAGGAUUC  | Cleavage | 1 |
| mdm-miR172n | PvAP2-ERF78  | 0,5 | 10,114 | 1 | 21 | 3796 | 3816 | AGAAUCUUGAUGAUGCUGCAG | CUGCAGCAUCAUCAGGAUUCU | Cleavage | 1 |
| mdm-miR172n | PvAP2-ERF20  | 1,5 | 9,626  | 1 | 21 | 2529 | 2549 | AGAAUCUUGAUGAUGCUGCAG | CUGCAGCAUCAUCAGGAUUC  | Cleavage | 1 |
| mdm-miR172n | PvAP2-ERF25  | 1,5 | 16,15  | 1 | 21 | 3063 | 3083 | AGAAUCUUGAUGAUGCUGCAG | CUGCAGCAUCAUCAGGAUUC  | Cleavage | 1 |
| mdm-miR172n | PvAP2-ERF62  | 1,5 | 16,463 | 1 | 21 | 3199 | 3219 | AGAAUCUUGAUGAUGCUGCAG | CUGCAGCAUCAUCAGGAUUC  | Cleavage | 1 |
| mdm-miR172n | PvAP2-ERF113 | 2,5 | 22,52  | 1 | 21 | 3571 | 3591 | AGAAUCUUGAUGAUGCUGCAG | CAGCAGCAUCAUCAGGAUUCG | Cleavage | 1 |
| mdm-miR172o | PvAP2-ERF173 | 0,5 | 11,33  | 1 | 21 | 3655 | 3675 | AGAAUCUUGAUGAUGCUGCAG | CUGCAGCAUCAUCAGGAUUCU | Cleavage | 1 |
| mdm-miR172o | PvAP2-ERF78  | 0,5 | 10,114 | 1 | 21 | 3796 | 3816 | AGAAUCUUGAUGAUGCUGCAG | CUGCAGCAUCAUCAGGAUUCU | Cleavage | 1 |
| mdm-miR172o | PvAP2-ERF20  | 1,5 | 9,626  | 1 | 21 | 2529 | 2549 | AGAAUCUUGAUGAUGCUGCAG | CUGCAGCAUCAUCAGGAUUC  | Cleavage | 1 |
| mdm-miR172o | PvAP2-ERF25  | 1,5 | 16,15  | 1 | 21 | 3063 | 3083 | AGAAUCUUGAUGAUGCUGCAG | CUGCAGCAUCAUCAGGAUUC  | Cleavage | 1 |
| mdm-miR172o | PvAP2-ERF62  | 1,5 | 16,463 | 1 | 21 | 3199 | 3219 | AGAAUCUUGAUGAUGCUGCAG | CUGCAGCAUCAUCAGGAUUC  | Cleavage | 1 |
| mdm-miR172o | PvAP2-ERF113 | 2,5 | 22,52  | 1 | 21 | 3571 | 3591 | AGAAUCUUGAUGAUGCUGCAG | CAGCAGCAUCAUCAGGAUUCG | Cleavage | 1 |

**Manihot esculenta**

| miRNA_Acc.  | Target_Acc.  | Expectation | UPE    | miRNA_start | miRNA_end | Target_start | Target_end | miRNA_aligned_fragment | Target_aligned_fragment | Inhibition | Target_Desc. | Multiplicity |
|-------------|--------------|-------------|--------|-------------|-----------|--------------|------------|------------------------|-------------------------|------------|--------------|--------------|
| mes-miR172a | PvAP2-ERF173 | 0,5         | 11,33  | 1           | 20        | 3656         | 3675       | AGAAUCUUGAUGAUGCUGCA   | UGCAGCAUCAUCAGGAUUCU    | Cleavage   |              | 1            |
| mes-miR172a | PvAP2-ERF78  | 0,5         | 10,114 | 1           | 20        | 3797         | 3816       | AGAAUCUUGAUGAUGCUGCA   | UGCAGCAUCAUCAGGAUUCU    | Cleavage   |              | 1            |
| mes-miR172a | PvAP2-ERF20  | 1,5         | 9,626  | 1           | 20        | 2530         | 2549       | AGAAUCUUGAUGAUGCUGCA   | UGCAGCAUCAUCAGGAUUC     | Cleavage   |              | 1            |
| mes-miR172a | PvAP2-ERF25  | 1,5         | 16,15  | 1           | 20        | 3064         | 3083       | AGAAUCUUGAUGAUGCUGCA   | UGCAGCAUCAUCAGGAUUC     | Cleavage   |              | 1            |
| mes-miR172a | PvAP2-ERF62  | 1,5         | 16,463 | 1           | 20        | 3200         | 3219       | AGAAUCUUGAUGAUGCUGCA   | UGCAGCAUCAUCAGGAUUC     | Cleavage   |              | 1            |
| mes-miR172a | PvAP2-ERF113 | 2,5         | 22,52  | 1           | 20        | 3572         | 3591       | AGAAUCUUGAUGAUGCUGCA   | AGCAGCAUCAUCAGGAUUCG    | Cleavage   |              | 1            |
| mes-miR172b | PvAP2-ERF173 | 0,5         | 11,33  | 1           | 20        | 3656         | 3675       | AGAAUCUUGAUGAUGCUGCA   | UGCAGCAUCAUCAGGAUUCU    | Cleavage   |              | 1            |
| mes-miR172b | PvAP2-ERF78  | 0,5         | 10,114 | 1           | 20        | 3797         | 3816       | AGAAUCUUGAUGAUGCUGCA   | UGCAGCAUCAUCAGGAUUCU    | Cleavage   |              | 1            |
| mes-miR172b | PvAP2-ERF20  | 1,5         | 9,626  | 1           | 20        | 2530         | 2549       | AGAAUCUUGAUGAUGCUGCA   | UGCAGCAUCAUCAGGAUUC     | Cleavage   |              | 1            |
| mes-miR172b | PvAP2-ERF25  | 1,5         | 16,15  | 1           | 20        | 3064         | 3083       | AGAAUCUUGAUGAUGCUGCA   | UGCAGCAUCAUCAGGAUUC     | Cleavage   |              | 1            |
| mes-miR172b | PvAP2-ERF62  | 1,5         | 16,463 | 1           | 20        | 3200         | 3219       | AGAAUCUUGAUGAUGCUGCA   | UGCAGCAUCAUCAGGAUUC     | Cleavage   |              | 1            |
| mes-miR172b | PvAP2-ERF113 | 2,5         | 22,52  | 1           | 20        | 3572         | 3591       | AGAAUCUUGAUGAUGCUGCA   | AGCAGCAUCAUCAGGAUUCG    | Cleavage   |              | 1            |
| mes-miR172c | PvAP2-ERF20  | 3           | 9,626  | 1           | 20        | 2530         | 2549       | UGAAUCUUGAUGAUGCUCG    | UGCAGCAUCAUCAGGAUUC     | Cleavage   |              | 1            |
| mes-miR172c | PvAP2-ERF25  | 3           | 16,15  | 1           | 20        | 3064         | 3083       | UGAAUCUUGAUGAUGCUCG    | UGCAGCAUCAUCAGGAUUC     | Cleavage   |              | 1            |
| mes-miR172c | PvAP2-ERF62  | 3           | 16,463 | 1           | 20        | 3200         | 3219       | UGAAUCUUGAUGAUGCUCG    | UGCAGCAUCAUCAGGAUUC     | Cleavage   |              | 1            |
| mes-miR172c | PvAP2-ERF113 | 3           | 22,52  | 1           | 20        | 3572         | 3591       | UGAAUCUUGAUGAUGCUCG    | AGCAGCAUCAUCAGGAUUCG    | Cleavage   |              | 1            |
| mes-miR172c | PvAP2-ERF173 | 3           | 11,33  | 1           | 20        | 3656         | 3675       | UGAAUCUUGAUGAUGCUCG    | UGCAGCAUCAUCAGGAUUCU    | Cleavage   |              | 1            |
| mes-miR172c | PvAP2-ERF78  | 3           | 10,114 | 1           | 20        | 3797         | 3816       | UGAAUCUUGAUGAUGCUCG    | UGCAGCAUCAUCAGGAUUCU    | Cleavage   |              | 1            |
| mes-miR172d | PvAP2-ERF173 | 0,5         | 11,33  | 1           | 20        | 3656         | 3675       | AGAAUCUUGAUGAUGCUGCA   | UGCAGCAUCAUCAGGAUUCU    | Cleavage   |              | 1            |
| mes-miR172d | PvAP2-ERF78  | 0,5         | 10,114 | 1           | 20        | 3797         | 3816       | AGAAUCUUGAUGAUGCUGCA   | UGCAGCAUCAUCAGGAUUCU    | Cleavage   |              | 1            |
| mes-miR172d | PvAP2-ERF20  | 1,5         | 9,626  | 1           | 20        | 2530         | 2549       | AGAAUCUUGAUGAUGCUGCA   | UGCAGCAUCAUCAGGAUUC     | Cleavage   |              | 1            |
| mes-miR172d | PvAP2-ERF25  | 1,5         | 16,15  | 1           | 20        | 3064         | 3083       | AGAAUCUUGAUGAUGCUGCA   | UGCAGCAUCAUCAGGAUUC     | Cleavage   |              | 1            |
| mes-miR172d | PvAP2-ERF62  | 1,5         | 16,463 | 1           | 20        | 3200         | 3219       | AGAAUCUUGAUGAUGCUGCA   | UGCAGCAUCAUCAGGAUUC     | Cleavage   |              | 1            |
| mes-miR172d | PvAP2-ERF113 | 2,5         | 22,52  | 1           | 20        | 3572         | 3591       | AGAAUCUUGAUGAUGCUGCA   | AGCAGCAUCAUCAGGAUUCG    | Cleavage   |              | 1            |
| mes-miR172e | PvAP2-ERF20  | 0,5         | 9,626  | 1           | 21        | 2529         | 2549       | GGAUUCUUGAUGAUGCUGCAG  | CUGCAGCAUCAUCAGGAUUC    | Cleavage   |              | 1            |
| mes-miR172e | PvAP2-ERF25  | 0,5         | 16,15  | 1           | 21        | 3063         | 3083       | GGAUUCUUGAUGAUGCUGCAG  | CUGCAGCAUCAUCAGGAUUC    | Cleavage   |              | 1            |
| mes-miR172e | PvAP2-ERF62  | 0,5         | 16,463 | 1           | 21        | 3199         | 3219       | GGAUUCUUGAUGAUGCUGCAG  | CUGCAGCAUCAUCAGGAUUC    | Cleavage   |              | 1            |
| mes-miR172e | PvAP2-ERF173 | 1           | 11,33  | 1           | 21        | 3655         | 3675       | GGAUUCUUGAUGAUGCUGCAG  | CUGCAGCAUCAUCAGGAUUCU   | Cleavage   |              | 1            |
| mes-miR172e | PvAP2-ERF78  | 1           | 10,114 | 1           | 21        | 3796         | 3816       | GGAUUCUUGAUGAUGCUGCAG  | CUGCAGCAUCAUCAGGAUUCU   | Cleavage   |              | 1            |
| mes-miR172e | PvAP2-ERF113 | 2,5         | 22,52  | 1           | 21        | 3571         | 3591       | GGAUUCUUGAUGAUGCUGCAG  | CAGCAGCAUCAUCAGGAUUCG   | Cleavage   |              | 1            |

|             |              |     |        |   |    |      |      |                       |                       |             |   |
|-------------|--------------|-----|--------|---|----|------|------|-----------------------|-----------------------|-------------|---|
| mes-miR172f | PvAP2-ERF20  | 0,5 | 9,626  | 1 | 21 | 2529 | 2549 | GGAUUCUUGAUGAUGCUGCAG | CUGCAGCAUCAUCAGGAUUC  | Cleavage    | 1 |
| mes-miR172f | PvAP2-ERF25  | 0,5 | 16,15  | 1 | 21 | 3063 | 3083 | GGAUUCUUGAUGAUGCUGCAG | CUGCAGCAUCAUCAGGAUUC  | Cleavage    | 1 |
| mes-miR172f | PvAP2-ERF62  | 0,5 | 16,463 | 1 | 21 | 3199 | 3219 | GGAUUCUUGAUGAUGCUGCAG | CUGCAGCAUCAUCAGGAUUC  | Cleavage    | 1 |
| mes-miR172f | PvAP2-ERF173 | 1   | 11,33  | 1 | 21 | 3655 | 3675 | GGAUUCUUGAUGAUGCUGCAG | CUGCAGCAUCAUCAGGAUUC  | Cleavage    | 1 |
| mes-miR172f | PvAP2-ERF78  | 1   | 10,114 | 1 | 21 | 3796 | 3816 | GGAUUCUUGAUGAUGCUGCAG | CUGCAGCAUCAUCAGGAUUC  | Cleavage    | 1 |
| mes-miR172f | PvAP2-ERF113 | 2,5 | 22,52  | 1 | 21 | 3571 | 3591 | GGAUUCUUGAUGAUGCUGCAG | CAGCAGCAUCAUCAGGAUUC  | Cleavage    | 1 |
| mes-miR2275 | PvAP2-ERF7   | 1   | 16,862 | 1 | 22 | 1455 | 1476 | UUUGGUUUCUCCAUAUCUUA  | UGAGAAAUUGGAGGAAACCAA | Cleavage    | 1 |
| mes-miR395e | PvAP2-ERF179 | 3   | 11,026 | 1 | 20 | 4356 | 4375 | CUGAAGGGUUUGGAGGAACU  | AGUUCUCCUAACUCCUCAG   | Translation | 1 |

**Medicago truncatula**

| miRNA_Acc.      | Target_Acc.  | Expectation | UPE    | miRNA_start | miRNA_end | Target_start | Target_end | miRNA_aligned_fragment  | Target_aligned_fragment | Inhibition  | Target_Desc. | Multiplicity |
|-----------------|--------------|-------------|--------|-------------|-----------|--------------|------------|-------------------------|-------------------------|-------------|--------------|--------------|
| mtr-miR172a     | PvAP2-ERF173 | 0           | 11,33  | 1           | 21        | 3655         | 3675       | AGAAUCCUGAUGAUGCUGCAG   | CUGCAGCAUCAUCAGGAUUCU   | Cleavage    |              | 1            |
| mtr-miR172a     | PvAP2-ERF78  | 0           | 10,114 | 1           | 21        | 3796         | 3816       | AGAAUCCUGAUGAUGCUGCAG   | CUGCAGCAUCAUCAGGAUUCU   | Cleavage    |              | 1            |
| mtr-miR172a     | PvAP2-ERF20  | 1           | 9,626  | 1           | 21        | 2529         | 2549       | AGAAUCCUGAUGAUGCUGCAG   | CUGCAGCAUCAUCAGGAUUC    | Cleavage    |              | 1            |
| mtr-miR172a     | PvAP2-ERF25  | 1           | 16,15  | 1           | 21        | 3063         | 3083       | AGAAUCCUGAUGAUGCUGCAG   | CUGCAGCAUCAUCAGGAUUC    | Cleavage    |              | 1            |
| mtr-miR172a     | PvAP2-ERF62  | 1           | 16,463 | 1           | 21        | 3199         | 3219       | AGAAUCCUGAUGAUGCUGCAG   | CUGCAGCAUCAUCAGGAUUC    | Cleavage    |              | 1            |
| mtr-miR172a     | PvAP2-ERF113 | 2           | 22,52  | 1           | 21        | 3571         | 3591       | AGAAUCCUGAUGAUGCUGCAG   | CAGCAGCAUCAUCAGGAUUC    | Cleavage    |              | 1            |
| mtr-miR172b     | PvAP2-ERF173 | 0,5         | 11,33  | 1           | 20        | 3656         | 3675       | AGAAUCCUGAUGAUGCUGCA    | UGCAGCAUCAUCAGGAUUCU    | Cleavage    |              | 1            |
| mtr-miR172b     | PvAP2-ERF78  | 0,5         | 10,114 | 1           | 20        | 3797         | 3816       | AGAAUCCUGAUGAUGCUGCA    | UGCAGCAUCAUCAGGAUUCU    | Cleavage    |              | 1            |
| mtr-miR172b     | PvAP2-ERF20  | 1,5         | 9,626  | 1           | 20        | 2530         | 2549       | AGAAUCCUGAUGAUGCUGCA    | UGCAGCAUCAUCAGGAUUC     | Cleavage    |              | 1            |
| mtr-miR172b     | PvAP2-ERF25  | 1,5         | 16,15  | 1           | 20        | 3064         | 3083       | AGAAUCCUGAUGAUGCUGCA    | UGCAGCAUCAUCAGGAUUC     | Cleavage    |              | 1            |
| mtr-miR172b     | PvAP2-ERF62  | 1,5         | 16,463 | 1           | 20        | 3200         | 3219       | AGAAUCCUGAUGAUGCUGCA    | UGCAGCAUCAUCAGGAUUC     | Cleavage    |              | 1            |
| mtr-miR172b     | PvAP2-ERF113 | 2,5         | 22,52  | 1           | 20        | 3572         | 3591       | AGAAUCCUGAUGAUGCUGCA    | AGCAGCAUCAUCAGGAUUC     | Cleavage    |              | 1            |
| mtr-miR172c-3p  | PvAP2-ERF173 | 0,5         | 11,33  | 1           | 20        | 3656         | 3675       | AGAAUCCUGAUGAUGCUGCA    | UGCAGCAUCAUCAGGAUUCU    | Cleavage    |              | 1            |
| mtr-miR172c-3p  | PvAP2-ERF78  | 0,5         | 10,114 | 1           | 20        | 3797         | 3816       | AGAAUCCUGAUGAUGCUGCA    | UGCAGCAUCAUCAGGAUUCU    | Cleavage    |              | 1            |
| mtr-miR172c-3p  | PvAP2-ERF20  | 1,5         | 9,626  | 1           | 20        | 2530         | 2549       | AGAAUCCUGAUGAUGCUGCA    | UGCAGCAUCAUCAGGAUUC     | Cleavage    |              | 1            |
| mtr-miR172c-3p  | PvAP2-ERF25  | 1,5         | 16,15  | 1           | 20        | 3064         | 3083       | AGAAUCCUGAUGAUGCUGCA    | UGCAGCAUCAUCAGGAUUC     | Cleavage    |              | 1            |
| mtr-miR172c-3p  | PvAP2-ERF62  | 1,5         | 16,463 | 1           | 20        | 3200         | 3219       | AGAAUCCUGAUGAUGCUGCA    | UGCAGCAUCAUCAGGAUUC     | Cleavage    |              | 1            |
| mtr-miR172c-3p  | PvAP2-ERF113 | 2,5         | 22,52  | 1           | 20        | 3572         | 3591       | AGAAUCCUGAUGAUGCUGCA    | AGCAGCAUCAUCAGGAUUC     | Cleavage    |              | 1            |
| mtr-miR172d-3p  | PvAP2-ERF173 | 0,5         | 11,33  | 1           | 20        | 3656         | 3675       | AGAAUCCUGAUGAUGCUGCA    | UGCAGCAUCAUCAGGAUUCU    | Cleavage    |              | 1            |
| mtr-miR172d-3p  | PvAP2-ERF78  | 0,5         | 10,114 | 1           | 20        | 3797         | 3816       | AGAAUCCUGAUGAUGCUGCA    | UGCAGCAUCAUCAGGAUUCU    | Cleavage    |              | 1            |
| mtr-miR172d-3p  | PvAP2-ERF20  | 1,5         | 9,626  | 1           | 20        | 2530         | 2549       | AGAAUCCUGAUGAUGCUGCA    | UGCAGCAUCAUCAGGAUUC     | Cleavage    |              | 1            |
| mtr-miR172d-3p  | PvAP2-ERF25  | 1,5         | 16,15  | 1           | 20        | 3064         | 3083       | AGAAUCCUGAUGAUGCUGCA    | UGCAGCAUCAUCAGGAUUC     | Cleavage    |              | 1            |
| mtr-miR172d-3p  | PvAP2-ERF62  | 1,5         | 16,463 | 1           | 20        | 3200         | 3219       | AGAAUCCUGAUGAUGCUGCA    | UGCAGCAUCAUCAGGAUUC     | Cleavage    |              | 1            |
| mtr-miR172d-3p  | PvAP2-ERF113 | 2,5         | 22,52  | 1           | 20        | 3572         | 3591       | AGAAUCCUGAUGAUGCUGCA    | AGCAGCAUCAUCAGGAUUC     | Cleavage    |              | 1            |
| mtr-miR2607     | PvAP2-ERF69  | 2,5         | 9,46   | 1           | 20        | 1326         | 1345       | AUGUGAUUAUGUGAUAAGUG    | CAUUAUGUACAUAAGUCACA    | Cleavage    |              | 1            |
| mtr-miR2619a    | PvAP2-ERF130 | 3           | 13,185 | 1           | 20        | 662          | 681        | ACAUAAGGAGGCGUUUUGUA    | AACAACAAGCAUCUUAUGC     | Translation |              | 1            |
| mtr-miR2643b-5p | PvAP2-ERF154 | 2           | 16,066 | 1           | 20        | 71           | 90         | UCUAAUCUCUGUCCCAAUU     | AGUUUGGAGCAGAGAUUAGA    | Cleavage    |              | 1            |
| mtr-miR2643b-5p | PvAP2-ERF103 | 3           | 12,902 | 1           | 20        | 740          | 759        | UCUAAUCUCUGUCCCAAUU     | AAUGGGUGGCAGAGAUUAGA    | Cleavage    |              | 1            |
| mtr-miR2673a    | PvAP2-ERF62  | 2           | 14,892 | 1           | 22        | 648          | 669        | CCUCUCCUCUCCUCUCCAC     | GAGGAGGAGGAGGACGAAGAGG  | Cleavage    |              | 1            |
| mtr-miR2673a    | PvAP2-ERF46  | 3           | 22,007 | 1           | 21        | 704          | 724        | CCUCUCCUCUCCUCUCCAC     | UGAAGGAGGAAGGAGGAGAGA   | Cleavage    |              | 1            |
| mtr-miR2673a    | PvAP2-ERF75  | 3           | 17,63  | 1           | 20        | 1361         | 1380       | CCUCUCCUCUCCUCUCCAC     | AGAAGAAGAAGAAGAAGAGG    | Cleavage    |              | 1            |
| mtr-miR2673b    | PvAP2-ERF62  | 2           | 14,892 | 1           | 22        | 648          | 669        | CCUCUCCUCUCCUCUCCAC     | GAGGAGGAGGAGGACGAAGAGG  | Cleavage    |              | 1            |
| mtr-miR2673b    | PvAP2-ERF46  | 3           | 22,007 | 1           | 21        | 704          | 724        | CCUCUCCUCUCCUCUCCAC     | UGAAGGAGGAAGGAGGAGAGA   | Cleavage    |              | 1            |
| mtr-miR2673b    | PvAP2-ERF75  | 3           | 17,63  | 1           | 20        | 1361         | 1380       | CCUCUCCUCUCCUCUCCAC     | AGAAGAAGAAGAAGAAGAGG    | Cleavage    |              | 1            |
| mtr-miR2678     | PvAP2-ERF39  | 3           | 11,144 | 1           | 20        | 228          | 247        | UGAAAUUGUUGCGAGUGUCU    | AAACACUCGCACCAAUUUCU    | Translation |              | 1            |
| mtr-miR396c     | PvAP2-ERF155 | 3           | 20,817 | 1           | 21        | 314          | 334        | AUUCAAAGAGGUCGUGGAAA    | UUUUGGAAGCCUUUCUUGAAU   | Cleavage    |              | 1            |
| mtr-miR5208d    | PvAP2-ERF150 | 3           | 13,045 | 1           | 24        | 998          | 1021       | CAUUAUAGUCAUUAUUUAGGCAU | AGGACUACAUAUUACUAGUGUU  | Translation |              | 1            |
| mtr-miR5210     | PvAP2-ERF112 | 3           | 14,819 | 1           | 20        | 808          | 827        | UAAUUGGUUGGAAUUAAGG     | CCUUAUUGUCAUUAUUUA      | Cleavage    |              | 1            |
| mtr-miR5241a    | PvAP2-ERF23  | 3           | 19,601 | 1           | 20        | 2573         | 2592       | UGACUGAAUGGAAGAGUGCA    | UGAACUUUUCUUUCAGUCA     | Translation |              | 1            |
| mtr-miR5241b    | PvAP2-ERF23  | 3           | 19,601 | 1           | 20        | 2573         | 2592       | UGACUGAAUGGAAGAGUGCA    | UGAACUUUUCUUUCAGUCA     | Translation |              | 1            |
| mtr-miR5241c    | PvAP2-ERF23  | 3           | 19,601 | 1           | 20        | 2573         | 2592       | UGACUGAAUGGAAGAGUGCA    | UGAACUUUUCUUUCAGUCA     | Translation |              | 1            |
| mtr-miR5298b    | PvAP2-ERF56  | 3           | 13,323 | 1           | 19        | 5            | 24         | UGAUGGAGAUUAUGAAG       | CUUCAUCGUAUCUUAUCA      | Cleavage    |              | 1            |
| mtr-miR5298c    | PvAP2-ERF56  | 3           | 13,323 | 1           | 19        | 5            | 24         | UGAUGGAGAUUAUGAAG       | CUUCAUCGUAUCUUAUCA      | Cleavage    |              | 1            |
| mtr-miR5558-5p  | PvAP2-ERF126 | 3           | 9,46   | 1           | 20        | 1196         | 1215       | UUUCCAAUUCUAAGUCUAU     | AUAGACAGAAUUGGAGAG      | Cleavage    |              | 1            |
| mtr-miR5749     | PvAP2-ERF32  | 3           | 11,302 | 1           | 20        | 2637         | 2656       | UUCGGUUGAUAAUUAUUUC     | AAAAUUUUUAUAACCUGAA     | Cleavage    |              | 1            |





|              |              |     |        |   |    |      |      |                        |                      |             |   |
|--------------|--------------|-----|--------|---|----|------|------|------------------------|----------------------|-------------|---|
| nta-miR172i  | PvAP2-ERF113 | 2,5 | 22,52  | 1 | 20 | 3572 | 3591 | AGAAUCUUGAUGAUGCUGCA   | AGCAGCAUCAUCAGGAUUCG | Cleavage    | 1 |
| nta-miR172j  | PvAP2-ERF20  | 0,5 | 9,626  | 1 | 20 | 2530 | 2549 | GGAAUCUUGAUGAUGCUGCA   | UGCAGCAUCAUCAGGAUUC  | Cleavage    | 1 |
| nta-miR172j  | PvAP2-ERF25  | 0,5 | 16,15  | 1 | 20 | 3064 | 3083 | GGAAUCUUGAUGAUGCUGCA   | UGCAGCAUCAUCAGGAUUC  | Cleavage    | 1 |
| nta-miR172j  | PvAP2-ERF62  | 0,5 | 16,463 | 1 | 20 | 3200 | 3219 | GGAAUCUUGAUGAUGCUGCA   | UGCAGCAUCAUCAGGAUUC  | Cleavage    | 1 |
| nta-miR172j  | PvAP2-ERF173 | 1   | 11,33  | 1 | 20 | 3656 | 3675 | GGAAUCUUGAUGAUGCUGCA   | UGCAGCAUCAUCAGGAUUC  | Cleavage    | 1 |
| nta-miR172j  | PvAP2-ERF78  | 1   | 10,114 | 1 | 20 | 3797 | 3816 | GGAAUCUUGAUGAUGCUGCA   | UGCAGCAUCAUCAGGAUUC  | Cleavage    | 1 |
| nta-miR172j  | PvAP2-ERF113 | 2,5 | 22,52  | 1 | 20 | 3572 | 3591 | GGAAUCUUGAUGAUGCUGCA   | AGCAGCAUCAUCAGGAUUC  | Cleavage    | 1 |
| nta-miR6025d | PvAP2-ERF149 | 3   | 7,325  | 1 | 20 | 1748 | 1767 | AACAAUUGAGAAACAUUA     | UACAUGUCAUUUAAUUGUU  | Cleavage    | 1 |
| nta-miR6144  | PvAP2-ERF138 | 3   | 7,664  | 1 | 20 | 2819 | 2838 | UGGCAACUUCUUAUCAUGC    | ACAUGAUAAAGAAGUUGUA  | Cleavage    | 1 |
| nta-miR6145d | PvAP2-ERF179 | 2,5 | 13,364 | 1 | 20 | 1918 | 1937 | AUUGUUACAUGUAACACUGG   | CUAGUGUCACAUUGGCAAU  | Cleavage    | 1 |
| nta-miR6145e | PvAP2-ERF179 | 3   | 13,364 | 1 | 20 | 1918 | 1937 | AUUGUUACAUGUAACACUGG   | CUAGUGUCACAUUGGCAAU  | Cleavage    | 1 |
| nta-miR6146a | PvAP2-ERF172 | 3   | 19,825 | 1 | 20 | 3065 | 3084 | UUUGUCCAUGAAACAUUA     | UAAGUUGUUAUGGGACAAG  | Cleavage    | 1 |
| nta-miR6151f | PvAP2-ERF10  | 3   | 3,71   | 1 | 20 | 58   | 77   | UGAGUGUGAGGCAUUGGAUU   | AUUCCAAUCACUCACACUA  | Translation | 1 |
| nta-miR6156  | PvAP2-ERF167 | 3   | 17,498 | 1 | 21 | 52   | 72   | UUGAAGAUGUUCUUAUUUCUGU | AAAGAAUUGGAAAUUUUCA  | Translation | 1 |

**Oryza sativa**

| miRNA_Acc.     | Target_Acc.  | Expectation | UPE    | miRNA_start | miRNA_end | Target_start | Target_end | miRNA_aligned_fragment | Target_aligned_fragment | Inhibition  | Target_Desc. | Multiplicity |
|----------------|--------------|-------------|--------|-------------|-----------|--------------|------------|------------------------|-------------------------|-------------|--------------|--------------|
| osa-miR1426    | PvAP2-ERF62  | 2           | 11,764 | 1           | 20        | 2195         | 2214       | AGAAUCUUGAUGAUGAUA     | UUAAUCAUCAUAGGGUUUU     | Cleavage    | 1            | 1            |
| osa-miR172a    | PvAP2-ERF173 | 0,5         | 11,33  | 1           | 20        | 3656         | 3675       | AGAAUCUUGAUGAUGCUGCA   | UGCAGCAUCAUCAGGAUUC     | Cleavage    | 1            | 1            |
| osa-miR172a    | PvAP2-ERF78  | 0,5         | 10,114 | 1           | 20        | 3797         | 3816       | AGAAUCUUGAUGAUGCUGCA   | UGCAGCAUCAUCAGGAUUC     | Cleavage    | 1            | 1            |
| osa-miR172a    | PvAP2-ERF20  | 1,5         | 9,626  | 1           | 20        | 2530         | 2549       | AGAAUCUUGAUGAUGCUGCA   | UGCAGCAUCAUCAGGAUUC     | Cleavage    | 1            | 1            |
| osa-miR172a    | PvAP2-ERF25  | 1,5         | 16,15  | 1           | 20        | 3064         | 3083       | AGAAUCUUGAUGAUGCUGCA   | UGCAGCAUCAUCAGGAUUC     | Cleavage    | 1            | 1            |
| osa-miR172a    | PvAP2-ERF62  | 1,5         | 16,463 | 1           | 20        | 3200         | 3219       | AGAAUCUUGAUGAUGCUGCA   | UGCAGCAUCAUCAGGAUUC     | Cleavage    | 1            | 1            |
| osa-miR172a    | PvAP2-ERF113 | 2,5         | 22,52  | 1           | 20        | 3572         | 3591       | AGAAUCUUGAUGAUGCUGCA   | AGCAGCAUCAUCAGGAUUC     | Cleavage    | 1            | 1            |
| osa-miR172b    | PvAP2-ERF62  | 0,5         | 16,463 | 1           | 20        | 3200         | 3219       | GGAAUCUUGAUGAUGCUGCA   | UGCAGCAUCAUCAGGAUUC     | Cleavage    | 1            | 1            |
| osa-miR172b    | PvAP2-ERF25  | 0,5         | 16,15  | 1           | 20        | 3064         | 3083       | GGAAUCUUGAUGAUGCUGCA   | UGCAGCAUCAUCAGGAUUC     | Cleavage    | 1            | 1            |
| osa-miR172b    | PvAP2-ERF20  | 0,5         | 9,626  | 1           | 20        | 2530         | 2549       | GGAAUCUUGAUGAUGCUGCA   | UGCAGCAUCAUCAGGAUUC     | Cleavage    | 1            | 1            |
| osa-miR172b    | PvAP2-ERF78  | 1           | 10,114 | 1           | 20        | 3797         | 3816       | GGAAUCUUGAUGAUGCUGCA   | UGCAGCAUCAUCAGGAUUC     | Cleavage    | 1            | 1            |
| osa-miR172b    | PvAP2-ERF173 | 1           | 11,33  | 1           | 20        | 3656         | 3675       | GGAAUCUUGAUGAUGCUGCA   | UGCAGCAUCAUCAGGAUUC     | Cleavage    | 1            | 1            |
| osa-miR172b    | PvAP2-ERF113 | 2,5         | 22,52  | 1           | 20        | 3572         | 3591       | GGAAUCUUGAUGAUGCUGCA   | AGCAGCAUCAUCAGGAUUC     | Cleavage    | 1            | 1            |
| osa-miR172c    | PvAP2-ERF20  | 1,5         | 9,626  | 1           | 20        | 2530         | 2549       | UGAAUCUUGAUGAUGCUGCA   | UGCAGCAUCAUCAGGAUUC     | Cleavage    | 1            | 1            |
| osa-miR172c    | PvAP2-ERF25  | 1,5         | 16,15  | 1           | 20        | 3064         | 3083       | UGAAUCUUGAUGAUGCUGCA   | UGCAGCAUCAUCAGGAUUC     | Cleavage    | 1            | 1            |
| osa-miR172c    | PvAP2-ERF62  | 1,5         | 16,463 | 1           | 20        | 3200         | 3219       | UGAAUCUUGAUGAUGCUGCA   | UGCAGCAUCAUCAGGAUUC     | Cleavage    | 1            | 1            |
| osa-miR172c    | PvAP2-ERF173 | 1,5         | 11,33  | 1           | 20        | 3656         | 3675       | UGAAUCUUGAUGAUGCUGCA   | UGCAGCAUCAUCAGGAUUC     | Cleavage    | 1            | 1            |
| osa-miR172c    | PvAP2-ERF78  | 1,5         | 10,114 | 1           | 20        | 3797         | 3816       | UGAAUCUUGAUGAUGCUGCA   | UGCAGCAUCAUCAGGAUUC     | Cleavage    | 1            | 1            |
| osa-miR172c    | PvAP2-ERF113 | 2           | 22,52  | 1           | 20        | 3572         | 3591       | UGAAUCUUGAUGAUGCUGCA   | AGCAGCAUCAUCAGGAUUC     | Cleavage    | 1            | 1            |
| osa-miR172d-3p | PvAP2-ERF173 | 0,5         | 11,33  | 1           | 20        | 3656         | 3675       | AGAAUCUUGAUGAUGCUGCA   | UGCAGCAUCAUCAGGAUUC     | Cleavage    | 1            | 1            |
| osa-miR172d-3p | PvAP2-ERF78  | 0,5         | 10,114 | 1           | 20        | 3797         | 3816       | AGAAUCUUGAUGAUGCUGCA   | UGCAGCAUCAUCAGGAUUC     | Cleavage    | 1            | 1            |
| osa-miR172d-3p | PvAP2-ERF20  | 1,5         | 9,626  | 1           | 20        | 2530         | 2549       | AGAAUCUUGAUGAUGCUGCA   | UGCAGCAUCAUCAGGAUUC     | Cleavage    | 1            | 1            |
| osa-miR172d-3p | PvAP2-ERF25  | 1,5         | 16,15  | 1           | 20        | 3064         | 3083       | AGAAUCUUGAUGAUGCUGCA   | UGCAGCAUCAUCAGGAUUC     | Cleavage    | 1            | 1            |
| osa-miR172d-3p | PvAP2-ERF62  | 1,5         | 16,463 | 1           | 20        | 3200         | 3219       | AGAAUCUUGAUGAUGCUGCA   | UGCAGCAUCAUCAGGAUUC     | Cleavage    | 1            | 1            |
| osa-miR172d-3p | PvAP2-ERF113 | 2,5         | 22,52  | 1           | 20        | 3572         | 3591       | AGAAUCUUGAUGAUGCUGCA   | AGCAGCAUCAUCAGGAUUC     | Cleavage    | 1            | 1            |
| osa-miR1865-5p | PvAP2-ERF179 | 3           | 16,671 | 1           | 21        | 4489         | 4509       | UGCUAGUGAUGGUGAUUCUUC  | GAAGAAUCAUCAUUGGUC      | Cleavage    | 1            | 1            |
| osa-miR1879    | PvAP2-ERF90  | 3           | 6,041  | 1           | 24        | 136          | 159        | GUGUUUGGUUAGGGUAGGGUGG | CCCAUUCUUAUAAAACCAACAC  | Cleavage    | 1            | 1            |
| osa-miR2055    | PvAP2-ERF85  | 3           | 14,072 | 1           | 20        | 213          | 232        | UUUCCUUGGGUAGGUGGUUU   | GAACCAUCUUAACAAGGAAA    | Translation | 1            | 1            |
| osa-miR2099-5p | PvAP2-ERF71  | 3           | 13,468 | 1           | 21        | 342          | 362        | UGAAUUGUUUGUACAAGCUU   | AAGCAUGUACAAGGUGUUA     | Cleavage    | 1            | 1            |
| osa-miR2275a   | PvAP2-ERF7   | 1           | 16,862 | 1           | 22        | 1455         | 1476       | UUUGGUUUCCUCCAUAUCUCA  | UGAGAAUUGGAGGAAACCAA    | Cleavage    | 1            | 1            |
| osa-miR2275b   | PvAP2-ERF7   | 1           | 16,862 | 1           | 22        | 1455         | 1476       | UUUGGUUUCCUCCAUAUCUCA  | UGAGAAUUGGAGGAAACCAA    | Cleavage    | 1            | 1            |
| osa-miR2873c   | PvAP2-ERF172 | 3           | 21,923 | 1           | 20        | 2673         | 2692       | CAAAUGAAGUUGGUUGGA     | UCCAACCGAGCUUCAGUUG     | Cleavage    | 1            | 1            |
| osa-miR2923    | PvAP2-ERF46  | 2,5         | 17,409 | 1           | 22        | 2388         | 2409       | AGACAAAAUUAUUAAACAAA   | UUUGUUAUUUUUUUUUUUUUU   | Translation | 1            | 1            |
| osa-miR414     | PvAP2-ERF166 | 2           | 23,018 | 1           | 21        | 329          | 349        | UCAUCCUCAUCAUCGUCC     | GGAGUAGUAGUAGGAGGACGA   | Cleavage    | 1            | 1            |
| osa-miR414     | PvAP2-ERF176 | 2,5         | 17,029 | 1           | 21        | 859          | 879        | UCAUCCUCAUCAUCGUCC     | GGAGUAGUAGUAGUAGUAGU    | Cleavage    | 1            | 1            |
| osa-miR435     | PvAP2-ERF60  | 3           | 19,24  | 1           | 20        | 953          | 972        | UUUACCGGUUUGGAGUUGA    | UCAACUCCAAAACUGGAGAA    | Translation | 1            | 1            |
| osa-miR5083    | PvAP2-ERF78  | 3           | 17,266 | 1           | 20        | 3004         | 3023       | AGACUACAAUUUUCUGAUC    | UGAAUAGGUUUUUGUAGUCU    | Translation | 1            | 1            |
| osa-miR5155    | PvAP2-ERF157 | 2,5         | 13,133 | 1           | 20        | 1103         | 1122       | ACUUUAAUACCAUUGGAA     | UUUCCAAUUGUUAUAAAGG     | Translation | 1            | 1            |
| osa-miR529b    | PvAP2-ERF94  | 3           | 21,493 | 1           | 20        | 486          | 505        | AGAAGAGAGAGUACAGCU     | ACUUGUAAUCUCUCUUUU      | Cleavage    | 1            | 1            |

|             |              |     |        |   |    |      |      |                         |                        |             |   |
|-------------|--------------|-----|--------|---|----|------|------|-------------------------|------------------------|-------------|---|
| osa-miR5339 | PvAP2-ERF141 | 2,5 | 23,148 | 1 | 20 | 615  | 634  | CAGAUAGAGAAUUCUCACG     | CUGAGGAGGUUGCUAUUUUG   | Translation | 1 |
| osa-miR5537 | PvAP2-ERF78  | 2,5 | 7,173  | 1 | 21 | 2722 | 2742 | AAUGUUUGUAUGGUAUCGUUUUG | UAAAUGCUUCAUUAACAACAUU | Cleavage    | 1 |
| osa-miR5809 | PvAP2-ERF110 | 3   | 18,828 | 1 | 20 | 881  | 900  | UCGUCGCCGGCCACACAGC     | GUUUUUGUUCCGGCCACGA    | Translation | 1 |
| osa-miR5817 | PvAP2-ERF152 | 3   | 11,749 | 1 | 20 | 2734 | 2753 | AUCGAAUUUGAAAGAAAAAG    | AUUUUUCUUCAAUUUUUUU    | Cleavage    | 1 |
| osa-miR5819 | PvAP2-ERF146 | 3   | 24,666 | 1 | 20 | 522  | 541  | AGGACGAGGGGAACGGCGGC    | GCCGUCCUCCUCUCGUCCU    | Cleavage    | 1 |
| osa-miR6251 | PvAP2-ERF15  | 3   | 15,935 | 1 | 20 | 244  | 263  | UGUGUAGCCACAUUGUAAGG    | CCUUGCAAUGUGGUACUCU    | Cleavage    | 1 |

**Physcomitrella patens**

| miRNA_Acc.      | Target_Acc.  | Expectation | UPE    | miRNA_start | miRNA_end | Target_start | Target_end | miRNA_aligned_fragment | Target_aligned_fragment | Inhibition  | Target_Desc. | Multiplicity |
|-----------------|--------------|-------------|--------|-------------|-----------|--------------|------------|------------------------|-------------------------|-------------|--------------|--------------|
| ppt-miR1023b-5p | PvAP2-ERF126 | 3           | 8,59   | 1           | 20        | 1201         | 1220       | ACACUCUCUCCAUUUUCUCUG  | CAGAGAAUUGGAGAGGGUUU    | Cleavage    | 1            |              |
| ppt-miR1023c-5p | PvAP2-ERF25  | 3           | 17,392 | 1           | 22        | 90           | 111        | CCACUCUCUCCGUUUCCCUUCC | GAGAGGGGAGAGGAGAGGGUGG  | Cleavage    | 1            |              |
| ppt-miR1023d-5p | PvAP2-ERF25  | 3           | 17,392 | 1           | 22        | 90           | 111        | CCACUCUCUCCGUUUCCCUUCC | GAGAGGGGAGAGGAGAGGGUGG  | Cleavage    | 1            |              |
| ppt-miR1039-5p  | PvAP2-ERF171 | 3           | 16,832 | 1           | 20        | 52           | 71         | UCUUUGGGUCUUUCUCUCCU   | AGGACAAAAGGACCUAAAGA    | Cleavage    | 1            |              |
| ppt-miR1054     | PvAP2-ERF84  | 3           | 19,879 | 1           | 20        | 244          | 263        | UAAACCCUCUCUUAUUCCU    | AGGAACGGAGUGAGGGUUUG    | Translation | 1            |              |
| ppt-miR1069-3p  | PvAP2-ERF7   | 3           | 14,795 | 1           | 21        | 1406         | 1426       | UGAUAAAUCAAAGUGCACU    | AGUGAGCAAUUGGAUUUGUUA   | Translation | 1            |              |
| ppt-miR414      | PvAP2-ERF166 | 3           | 23,018 | 1           | 21        | 329          | 349        | UCAUCCUCAUACUCCGUCC    | GGAUGAUGAUGAUGAGGACGA   | Cleavage    | 1            |              |
| ppt-miR419      | PvAP2-ERF56  | 3           | 13,323 | 1           | 20        | 6            | 24         | UGAUGAAUGAGACGAUGUA    | UUCAUCGUCAUC-UUCAUCA    | Cleavage    | 1            |              |

**Pinus taeda**

| miRNA_Acc.  | Target_Acc. | Expectation | UPE    | miRNA_start | miRNA_end | Target_start | Target_end | miRNA_aligned_fragment | Target_aligned_fragment | Inhibition  | Target_Desc. | Multiplicity |
|-------------|-------------|-------------|--------|-------------|-----------|--------------|------------|------------------------|-------------------------|-------------|--------------|--------------|
| pta-miR156b | PvAP2-ERF53 | 2,5         | 12,909 | 1           | 20        | 811          | 830        | CAGAAGAUAGAGAGCACAAAC  | GUGGUGUUUCUCAAUCUUCUG   | Translation | 1            |              |

**Populus trichocarpa**

| miRNA_Acc.     | Target_Acc.  | Expectation | UPE    | miRNA_start | miRNA_end | Target_start | Target_end | miRNA_aligned_fragment | Target_aligned_fragment | Inhibition  | Target_Desc. | Multiplicity |
|----------------|--------------|-------------|--------|-------------|-----------|--------------|------------|------------------------|-------------------------|-------------|--------------|--------------|
| ptc-miR1450    | PvAP2-ERF123 | 3           | 14,816 | 1           | 20        | 562          | 581        | UUCAAUUGGCUCGGUCAGGUU  | AACCUCACUGAUCAUUGAA     | Translation | 1            |              |
| ptc-miR156l    | PvAP2-ERF117 | 3           | 21,038 | 1           | 20        | 383          | 402        | UUGACAGAAGAUUGGAGAGCA  | UCUUCUUUCUUCUUCUGUCAA   | Cleavage    | 1            |              |
| ptc-miR172a    | PvAP2-ERF173 | 0,5         | 11,33  | 1           | 20        | 3656         | 3675       | AGAAUCUUGAUGAUGCUGCA   | UGCAGCAUCAUCAGGAUUUCU   | Cleavage    | 1            |              |
| ptc-miR172a    | PvAP2-ERF78  | 0,5         | 10,114 | 1           | 20        | 3797         | 3816       | AGAAUCUUGAUGAUGCUGCA   | UGCAGCAUCAUCAGGAUUUCU   | Cleavage    | 1            |              |
| ptc-miR172a    | PvAP2-ERF20  | 1,5         | 9,626  | 1           | 20        | 2530         | 2549       | AGAAUCUUGAUGAUGCUGCA   | UGCAGCAUCAUCAGGAUUCU    | Cleavage    | 1            |              |
| ptc-miR172a    | PvAP2-ERF25  | 1,5         | 16,15  | 1           | 20        | 3064         | 3083       | AGAAUCUUGAUGAUGCUGCA   | UGCAGCAUCAUCAGGAUUCU    | Cleavage    | 1            |              |
| ptc-miR172a    | PvAP2-ERF62  | 1,5         | 16,463 | 1           | 20        | 3200         | 3219       | AGAAUCUUGAUGAUGCUGCA   | UGCAGCAUCAUCAGGAUUCU    | Cleavage    | 1            |              |
| ptc-miR172a    | PvAP2-ERF113 | 2,5         | 22,52  | 1           | 20        | 3572         | 3591       | AGAAUCUUGAUGAUGCUGCA   | AGCAGCAUCAUCAGGAUUCG    | Cleavage    | 1            |              |
| ptc-miR172b-3p | PvAP2-ERF173 | 0,5         | 11,33  | 1           | 20        | 3656         | 3675       | AGAAUCUUGAUGAUGCUGCA   | UGCAGCAUCAUCAGGAUUCU    | Cleavage    | 1            |              |
| ptc-miR172b-3p | PvAP2-ERF78  | 0,5         | 10,114 | 1           | 20        | 3797         | 3816       | AGAAUCUUGAUGAUGCUGCA   | UGCAGCAUCAUCAGGAUUCU    | Cleavage    | 1            |              |
| ptc-miR172b-3p | PvAP2-ERF20  | 1,5         | 9,626  | 1           | 20        | 2530         | 2549       | AGAAUCUUGAUGAUGCUGCA   | UGCAGCAUCAUCAGGAUUCU    | Cleavage    | 1            |              |
| ptc-miR172b-3p | PvAP2-ERF25  | 1,5         | 16,15  | 1           | 20        | 3064         | 3083       | AGAAUCUUGAUGAUGCUGCA   | UGCAGCAUCAUCAGGAUUCU    | Cleavage    | 1            |              |
| ptc-miR172b-3p | PvAP2-ERF62  | 1,5         | 16,463 | 1           | 20        | 3200         | 3219       | AGAAUCUUGAUGAUGCUGCA   | UGCAGCAUCAUCAGGAUUCU    | Cleavage    | 1            |              |
| ptc-miR172b-3p | PvAP2-ERF113 | 2,5         | 22,52  | 1           | 20        | 3572         | 3591       | AGAAUCUUGAUGAUGCUGCA   | AGCAGCAUCAUCAGGAUUCG    | Cleavage    | 1            |              |
| ptc-miR172c    | PvAP2-ERF173 | 0,5         | 11,33  | 1           | 20        | 3656         | 3675       | AGAAUCUUGAUGAUGCUGCA   | UGCAGCAUCAUCAGGAUUCU    | Cleavage    | 1            |              |
| ptc-miR172c    | PvAP2-ERF78  | 0,5         | 10,114 | 1           | 20        | 3797         | 3816       | AGAAUCUUGAUGAUGCUGCA   | UGCAGCAUCAUCAGGAUUCU    | Cleavage    | 1            |              |
| ptc-miR172c    | PvAP2-ERF20  | 1,5         | 9,626  | 1           | 20        | 2530         | 2549       | AGAAUCUUGAUGAUGCUGCA   | UGCAGCAUCAUCAGGAUUCU    | Cleavage    | 1            |              |
| ptc-miR172c    | PvAP2-ERF25  | 1,5         | 16,15  | 1           | 20        | 3064         | 3083       | AGAAUCUUGAUGAUGCUGCA   | UGCAGCAUCAUCAGGAUUCU    | Cleavage    | 1            |              |
| ptc-miR172c    | PvAP2-ERF62  | 1,5         | 16,463 | 1           | 20        | 3200         | 3219       | AGAAUCUUGAUGAUGCUGCA   | UGCAGCAUCAUCAGGAUUCU    | Cleavage    | 1            |              |
| ptc-miR172c    | PvAP2-ERF113 | 2,5         | 22,52  | 1           | 20        | 3572         | 3591       | AGAAUCUUGAUGAUGCUGCA   | AGCAGCAUCAUCAGGAUUCG    | Cleavage    | 1            |              |
| ptc-miR172d    | PvAP2-ERF20  | 0,5         | 9,626  | 1           | 20        | 2530         | 2549       | GAAUCUUGAUGAUGCUGCA    | UGCAGCAUCAUCAGGAUUCU    | Cleavage    | 1            |              |
| ptc-miR172d    | PvAP2-ERF25  | 0,5         | 16,15  | 1           | 20        | 3064         | 3083       | GAAUCUUGAUGAUGCUGCA    | UGCAGCAUCAUCAGGAUUCU    | Cleavage    | 1            |              |
| ptc-miR172d    | PvAP2-ERF62  | 0,5         | 16,463 | 1           | 20        | 3200         | 3219       | GAAUCUUGAUGAUGCUGCA    | UGCAGCAUCAUCAGGAUUCU    | Cleavage    | 1            |              |
| ptc-miR172d    | PvAP2-ERF173 | 1           | 11,33  | 1           | 20        | 3656         | 3675       | GAAUCUUGAUGAUGCUGCA    | UGCAGCAUCAUCAGGAUUCU    | Cleavage    | 1            |              |
| ptc-miR172d    | PvAP2-ERF78  | 1           | 10,114 | 1           | 20        | 3797         | 3816       | GAAUCUUGAUGAUGCUGCA    | UGCAGCAUCAUCAGGAUUCU    | Cleavage    | 1            |              |
| ptc-miR172d    | PvAP2-ERF113 | 2,5         | 22,52  | 1           | 20        | 3572         | 3591       | GAAUCUUGAUGAUGCUGCA    | AGCAGCAUCAUCAGGAUUCG    | Cleavage    | 1            |              |
| ptc-miR172e    | PvAP2-ERF20  | 0,5         | 9,626  | 1           | 20        | 2530         | 2549       | GAAUCUUGAUGAUGCUGCA    | UGCAGCAUCAUCAGGAUUCU    | Cleavage    | 1            |              |
| ptc-miR172e    | PvAP2-ERF25  | 0,5         | 16,15  | 1           | 20        | 3064         | 3083       | GAAUCUUGAUGAUGCUGCA    | UGCAGCAUCAUCAGGAUUCU    | Cleavage    | 1            |              |
| ptc-miR172e    | PvAP2-ERF62  | 0,5         | 16,463 | 1           | 20        | 3200         | 3219       | GAAUCUUGAUGAUGCUGCA    | UGCAGCAUCAUCAGGAUUCU    | Cleavage    | 1            |              |
| ptc-miR172e    | PvAP2-ERF173 | 1           | 11,33  | 1           | 20        | 3656         | 3675       | GAAUCUUGAUGAUGCUGCA    | UGCAGCAUCAUCAGGAUUCU    | Cleavage    | 1            |              |
| ptc-miR172e    | PvAP2-ERF78  | 1           | 10,114 | 1           | 20        | 3797         | 3816       | GAAUCUUGAUGAUGCUGCA    | UGCAGCAUCAUCAGGAUUCU    | Cleavage    | 1            |              |
| ptc-miR172e    | PvAP2-ERF113 | 2,5         | 22,52  | 1           | 20        | 3572         | 3591       | GAAUCUUGAUGAUGCUGCA    | AGCAGCAUCAUCAGGAUUCG    | Cleavage    | 1            |              |
| ptc-miR172f    | PvAP2-ERF173 | 0,5         | 11,33  | 1           | 20        | 3656         | 3675       | AGAAUCUUGAUGAUGCUGCA   | UGCAGCAUCAUCAGGAUUCU    | Cleavage    | 1            |              |
| ptc-miR172f    | PvAP2-ERF78  | 0,5         | 10,114 | 1           | 20        | 3797         | 3816       | AGAAUCUUGAUGAUGCUGCA   | UGCAGCAUCAUCAGGAUUCU    | Cleavage    | 1            |              |

|                |              |     |        |   |    |      |      |                         |                         |             |   |
|----------------|--------------|-----|--------|---|----|------|------|-------------------------|-------------------------|-------------|---|
| ptc-miR172f    | PvAP2-ERF20  | 1,5 | 9,626  | 1 | 20 | 2530 | 2549 | AGAAUCUUGAUGAUGCUGCA    | UGCAGCAUCAUCAGGAUUC     | Cleavage    | 1 |
| ptc-miR172f    | PvAP2-ERF25  | 1,5 | 16,15  | 1 | 20 | 3064 | 3083 | AGAAUCUUGAUGAUGCUGCA    | UGCAGCAUCAUCAGGAUUC     | Cleavage    | 1 |
| ptc-miR172f    | PvAP2-ERF62  | 1,5 | 16,463 | 1 | 20 | 3200 | 3219 | AGAAUCUUGAUGAUGCUGCA    | UGCAGCAUCAUCAGGAUUC     | Cleavage    | 1 |
| ptc-miR172f    | PvAP2-ERF113 | 2,5 | 22,52  | 1 | 20 | 3572 | 3591 | AGAAUCUUGAUGAUGCUGCA    | AGCAGCAUCAUCAGGAUUC     | Cleavage    | 1 |
| ptc-miR172g-3p | PvAP2-ERF20  | 0,5 | 9,626  | 1 | 21 | 2529 | 2549 | GGAUUCUUGAUGAUGCUGCAG   | CUGCAGCAUCAUCAGGAUUC    | Cleavage    | 1 |
| ptc-miR172g-3p | PvAP2-ERF25  | 0,5 | 16,15  | 1 | 21 | 3063 | 3083 | GGAUUCUUGAUGAUGCUGCAG   | CUGCAGCAUCAUCAGGAUUC    | Cleavage    | 1 |
| ptc-miR172g-3p | PvAP2-ERF62  | 0,5 | 16,463 | 1 | 21 | 3199 | 3219 | GGAUUCUUGAUGAUGCUGCAG   | CUGCAGCAUCAUCAGGAUUC    | Cleavage    | 1 |
| ptc-miR172g-3p | PvAP2-ERF173 | 1   | 11,33  | 1 | 21 | 3655 | 3675 | GGAUUCUUGAUGAUGCUGCAG   | CUGCAGCAUCAUCAGGAUUC    | Cleavage    | 1 |
| ptc-miR172g-3p | PvAP2-ERF78  | 1   | 10,114 | 1 | 21 | 3796 | 3816 | GGAUUCUUGAUGAUGCUGCAG   | CUGCAGCAUCAUCAGGAUUC    | Cleavage    | 1 |
| ptc-miR172g-3p | PvAP2-ERF113 | 2,5 | 22,52  | 1 | 21 | 3571 | 3591 | GGAUUCUUGAUGAUGCUGCAG   | CAGCAGCAUCAUCAGGAUUC    | Cleavage    | 1 |
| ptc-miR172h-3p | PvAP2-ERF20  | 0,5 | 9,626  | 1 | 21 | 2529 | 2549 | GGAUUCUUGAUGAUGCUGCAG   | CUGCAGCAUCAUCAGGAUUC    | Cleavage    | 1 |
| ptc-miR172h-3p | PvAP2-ERF25  | 0,5 | 16,15  | 1 | 21 | 3063 | 3083 | GGAUUCUUGAUGAUGCUGCAG   | CUGCAGCAUCAUCAGGAUUC    | Cleavage    | 1 |
| ptc-miR172h-3p | PvAP2-ERF62  | 0,5 | 16,463 | 1 | 21 | 3199 | 3219 | GGAUUCUUGAUGAUGCUGCAG   | CUGCAGCAUCAUCAGGAUUC    | Cleavage    | 1 |
| ptc-miR172h-3p | PvAP2-ERF173 | 1   | 11,33  | 1 | 21 | 3655 | 3675 | GGAUUCUUGAUGAUGCUGCAG   | CUGCAGCAUCAUCAGGAUUC    | Cleavage    | 1 |
| ptc-miR172h-3p | PvAP2-ERF78  | 1   | 10,114 | 1 | 21 | 3796 | 3816 | GGAUUCUUGAUGAUGCUGCAG   | CUGCAGCAUCAUCAGGAUUC    | Cleavage    | 1 |
| ptc-miR172h-3p | PvAP2-ERF113 | 2,5 | 22,52  | 1 | 21 | 3571 | 3591 | GGAUUCUUGAUGAUGCUGCAG   | CAGCAGCAUCAUCAGGAUUC    | Cleavage    | 1 |
| ptc-miR172i    | PvAP2-ERF78  | 0   | 10,114 | 1 | 20 | 3797 | 3816 | AGAAUCUGAUGAUGCUGCA     | UGCAGCAUCAUCAGGAUUC     | Cleavage    | 1 |
| ptc-miR172i    | PvAP2-ERF20  | 1   | 9,626  | 1 | 20 | 2530 | 2549 | AGAAUCUUGAUGAUGCUGCA    | UGCAGCAUCAUCAGGAUUC     | Cleavage    | 1 |
| ptc-miR172i    | PvAP2-ERF25  | 1   | 16,15  | 1 | 20 | 3064 | 3083 | AGAAUCUUGAUGAUGCUGCA    | UGCAGCAUCAUCAGGAUUC     | Cleavage    | 1 |
| ptc-miR172i    | PvAP2-ERF62  | 1   | 16,463 | 1 | 20 | 3200 | 3219 | AGAAUCUUGAUGAUGCUGCA    | UGCAGCAUCAUCAGGAUUC     | Cleavage    | 1 |
| ptc-miR172i    | PvAP2-ERF113 | 2   | 22,52  | 1 | 20 | 3572 | 3591 | AGAAUCUUGAUGAUGCUGCA    | AGCAGCAUCAUCAGGAUUC     | Cleavage    | 1 |
| ptc-miR395a    | PvAP2-ERF179 | 3   | 11,026 | 1 | 20 | 4356 | 4375 | CUGAAGGGUUUGGAGGAACU    | AGUUCUCCUUAUCUCCAG      | Translation | 1 |
| ptc-miR478e    | PvAP2-ERF104 | 3   | 10,814 | 1 | 23 | 145  | 167  | UGACGAGUCUUCUUAUUUUAGGG | CUGUAAAAGUUGAAGACUCCUCA | Cleavage    | 1 |
| ptc-miR6426a   | PvAP2-ERF60  | 2,5 | 16,344 | 1 | 20 | 2387 | 2406 | GUGGAGACUUGAUGAUGCUGCA  | UUUCUCUUUCAUGUUUCCAC    | Cleavage    | 1 |
| ptc-miR6426a   | PvAP2-ERF128 | 3   | 9,875  | 1 | 20 | 6669 | 6688 | GUGGAGACUUGAUGAUGCUGCA  | UUUUUUUUUCAUUAUCUCCAC   | Cleavage    | 1 |
| ptc-miR6426b   | PvAP2-ERF60  | 2,5 | 16,344 | 1 | 20 | 2387 | 2406 | GUGGAGACUUGAUGAUGCUGCA  | UUUCUCUUUCAUGUUUCCAC    | Cleavage    | 1 |
| ptc-miR6426b   | PvAP2-ERF128 | 3   | 9,875  | 1 | 20 | 6669 | 6688 | GUGGAGACUUGAUGAUGCUGCA  | UUUUUUUUUCAUUAUCUCCAC   | Cleavage    | 1 |
| ptc-miR6447    | PvAP2-ERF25  | 2,5 | 21,38  | 1 | 21 | 797  | 817  | UUGACGAAAUGUAGACGACUAC  | GUAGCGUCAAUUUUGUGCAA    | Translation | 1 |
| ptc-miR6455    | PvAP2-ERF146 | 3   | 12,568 | 1 | 21 | 1123 | 1143 | UCAAAUAGCAUCUCAAACAUU   | GAUGAUGAUGUUUUUUGG      | Cleavage    | 1 |
| ptc-miR7816    | PvAP2-ERF165 | 1,5 | 9,181  | 1 | 20 | 899  | 918  | AAUGUUGUUUUAAACACUGU    | GCACUGUUUUAAACAACAUU    | Cleavage    | 1 |
| ptc-miR7825    | PvAP2-ERF141 | 3   | 13,382 | 1 | 22 | 270  | 292  | UUGAAGAAAG-GUAGACAGAUAG | UUUUUUGUCUACACUUUCUUCAG | Translation | 1 |
| ptc-miR7825    | PvAP2-ERF68  | 3   | 15,666 | 1 | 20 | 137  | 156  | UUGAAGAAAGGUAGACAGAU    | AGCUGUGAACCUUUUCUCAA    | Cleavage    | 1 |
| ptc-miR7833    | PvAP2-ERF12  | 3   | 9,648  | 1 | 19 | 2042 | 2061 | UAAUUU-GAACUCAUACUAG    | UUAGUAUGAGUUCUAAUUA     | Cleavage    | 1 |

#### Ricinus communis

| miRNA_Acc. | Target_Acc.  | Expectation | UPE    | miRNA_start | miRNA_end | Target_start | Target_end | miRNA_aligned_fragment | Target_aligned_fragment | Inhibition | Target_Desc. | Multiplicity |
|------------|--------------|-------------|--------|-------------|-----------|--------------|------------|------------------------|-------------------------|------------|--------------|--------------|
| rco-miR172 | PvAP2-ERF20  | 0,5         | 9,626  | 1           | 21        | 2529         | 2549       | GGAUUCUUGAUGAUGCUGCAG  | CUGCAGCAUCAUCAGGAUUC    | Cleavage   |              | 1            |
| rco-miR172 | PvAP2-ERF25  | 0,5         | 16,15  | 1           | 21        | 3063         | 3083       | GGAUUCUUGAUGAUGCUGCAG  | CUGCAGCAUCAUCAGGAUUC    | Cleavage   |              | 1            |
| rco-miR172 | PvAP2-ERF62  | 0,5         | 16,463 | 1           | 21        | 3199         | 3219       | GGAUUCUUGAUGAUGCUGCAG  | CUGCAGCAUCAUCAGGAUUC    | Cleavage   |              | 1            |
| rco-miR172 | PvAP2-ERF173 | 1           | 11,33  | 1           | 21        | 3655         | 3675       | GGAUUCUUGAUGAUGCUGCAG  | CUGCAGCAUCAUCAGGAUUC    | Cleavage   |              | 1            |
| rco-miR172 | PvAP2-ERF78  | 1           | 10,114 | 1           | 21        | 3796         | 3816       | GGAUUCUUGAUGAUGCUGCAG  | CUGCAGCAUCAUCAGGAUUC    | Cleavage   |              | 1            |
| rco-miR172 | PvAP2-ERF113 | 2,5         | 22,52  | 1           | 21        | 3571         | 3591       | GGAUUCUUGAUGAUGCUGCAG  | CAGCAGCAUCAUCAGGAUUC    | Cleavage   |              | 1            |

#### Sorghum bicolor

| miRNA_Acc.  | Target_Acc.  | Expectation | UPE    | miRNA_start | miRNA_end | Target_start | Target_end | miRNA_aligned_fragment | Target_aligned_fragment | Inhibition | Target_Desc. | Multiplicity |
|-------------|--------------|-------------|--------|-------------|-----------|--------------|------------|------------------------|-------------------------|------------|--------------|--------------|
| sbi-miR172a | PvAP2-ERF173 | 0,5         | 11,33  | 1           | 20        | 3656         | 3675       | AGAAUCUUGAUGAUGCUGCA   | UGCAGCAUCAUCAGGAUUC     | Cleavage   |              | 1            |
| sbi-miR172a | PvAP2-ERF78  | 0,5         | 10,114 | 1           | 20        | 3797         | 3816       | AGAAUCUUGAUGAUGCUGCA   | UGCAGCAUCAUCAGGAUUC     | Cleavage   |              | 1            |
| sbi-miR172a | PvAP2-ERF20  | 1,5         | 9,626  | 1           | 20        | 2530         | 2549       | AGAAUCUUGAUGAUGCUGCA   | UGCAGCAUCAUCAGGAUUC     | Cleavage   |              | 1            |
| sbi-miR172a | PvAP2-ERF25  | 1,5         | 16,15  | 1           | 20        | 3064         | 3083       | AGAAUCUUGAUGAUGCUGCA   | UGCAGCAUCAUCAGGAUUC     | Cleavage   |              | 1            |
| sbi-miR172a | PvAP2-ERF62  | 1,5         | 16,463 | 1           | 20        | 3200         | 3219       | AGAAUCUUGAUGAUGCUGCA   | UGCAGCAUCAUCAGGAUUC     | Cleavage   |              | 1            |
| sbi-miR172a | PvAP2-ERF113 | 2,5         | 22,52  | 1           | 20        | 3572         | 3591       | AGAAUCUUGAUGAUGCUGCA   | AGCAGCAUCAUCAGGAUUC     | Cleavage   |              | 1            |
| sbi-miR172b | PvAP2-ERF20  | 0,5         | 9,626  | 1           | 20        | 2530         | 2549       | GGAUUCUUGAUGAUGCUGCA   | UGCAGCAUCAUCAGGAUUC     | Cleavage   |              | 1            |
| sbi-miR172b | PvAP2-ERF25  | 0,5         | 16,15  | 1           | 20        | 3064         | 3083       | GGAUUCUUGAUGAUGCUGCA   | UGCAGCAUCAUCAGGAUUC     | Cleavage   |              | 1            |
| sbi-miR172b | PvAP2-ERF62  | 0,5         | 16,463 | 1           | 20        | 3200         | 3219       | GGAUUCUUGAUGAUGCUGCA   | UGCAGCAUCAUCAGGAUUC     | Cleavage   |              | 1            |
| sbi-miR172b | PvAP2-ERF173 | 1           | 11,33  | 1           | 20        | 3656         | 3675       | GGAUUCUUGAUGAUGCUGCA   | UGCAGCAUCAUCAGGAUUC     | Cleavage   |              | 1            |
| sbi-miR172b | PvAP2-ERF78  | 1           | 10,114 | 1           | 20        | 3797         | 3816       | GGAUUCUUGAUGAUGCUGCA   | UGCAGCAUCAUCAGGAUUC     | Cleavage   |              | 1            |

|                |              |     |        |   |    |      |      |                          |                           |             |   |
|----------------|--------------|-----|--------|---|----|------|------|--------------------------|---------------------------|-------------|---|
| sbi-miR172b    | PvAP2-ERF113 | 2,5 | 22,52  | 1 | 20 | 3572 | 3591 | GGAUUCUUGAUGAUGCUGCA     | AGCAGCAUCAUCAGGAUUCG      | Cleavage    | 1 |
| sbi-miR172c    | PvAP2-ERF173 | 0,5 | 11,33  | 1 | 20 | 3656 | 3675 | AGAAUCUUGAUGAUGCUGCA     | UGCAGCAUCAUCAGGAUUCU      | Cleavage    | 1 |
| sbi-miR172c    | PvAP2-ERF78  | 0,5 | 10,114 | 1 | 20 | 3797 | 3816 | AGAAUCUUGAUGAUGCUGCA     | UGCAGCAUCAUCAGGAUUCU      | Cleavage    | 1 |
| sbi-miR172c    | PvAP2-ERF20  | 1,5 | 9,626  | 1 | 20 | 2530 | 2549 | AGAAUCUUGAUGAUGCUGCA     | UGCAGCAUCAUCAGGAUUCU      | Cleavage    | 1 |
| sbi-miR172c    | PvAP2-ERF25  | 1,5 | 16,15  | 1 | 20 | 3064 | 3083 | AGAAUCUUGAUGAUGCUGCA     | UGCAGCAUCAUCAGGAUUCU      | Cleavage    | 1 |
| sbi-miR172c    | PvAP2-ERF62  | 1,5 | 16,463 | 1 | 20 | 3200 | 3219 | AGAAUCUUGAUGAUGCUGCA     | UGCAGCAUCAUCAGGAUUCU      | Cleavage    | 1 |
| sbi-miR172c    | PvAP2-ERF113 | 2,5 | 22,52  | 1 | 20 | 3572 | 3591 | AGAAUCUUGAUGAUGCUGCA     | AGCAGCAUCAUCAGGAUUCG      | Cleavage    | 1 |
| sbi-miR172d    | PvAP2-ERF173 | 0,5 | 11,33  | 1 | 20 | 3656 | 3675 | AGAAUCUUGAUGAUGCUGCA     | UGCAGCAUCAUCAGGAUUCU      | Cleavage    | 1 |
| sbi-miR172d    | PvAP2-ERF78  | 0,5 | 10,114 | 1 | 20 | 3797 | 3816 | AGAAUCUUGAUGAUGCUGCA     | UGCAGCAUCAUCAGGAUUCU      | Cleavage    | 1 |
| sbi-miR172d    | PvAP2-ERF20  | 1,5 | 9,626  | 1 | 20 | 2530 | 2549 | AGAAUCUUGAUGAUGCUGCA     | UGCAGCAUCAUCAGGAUUCU      | Cleavage    | 1 |
| sbi-miR172d    | PvAP2-ERF25  | 1,5 | 16,15  | 1 | 20 | 3064 | 3083 | AGAAUCUUGAUGAUGCUGCA     | UGCAGCAUCAUCAGGAUUCU      | Cleavage    | 1 |
| sbi-miR172d    | PvAP2-ERF62  | 1,5 | 16,463 | 1 | 20 | 3200 | 3219 | AGAAUCUUGAUGAUGCUGCA     | UGCAGCAUCAUCAGGAUUCU      | Cleavage    | 1 |
| sbi-miR172d    | PvAP2-ERF113 | 2,5 | 22,52  | 1 | 20 | 3572 | 3591 | AGAAUCUUGAUGAUGCUGCA     | AGCAGCAUCAUCAGGAUUCG      | Cleavage    | 1 |
| sbi-miR172e    | PvAP2-ERF20  | 1,5 | 9,626  | 1 | 20 | 2530 | 2549 | UGAAUCUUGAUGAUGCUGCA     | UGCAGCAUCAUCAGGAUUCU      | Cleavage    | 1 |
| sbi-miR172e    | PvAP2-ERF25  | 1,5 | 16,15  | 1 | 20 | 3064 | 3083 | UGAAUCUUGAUGAUGCUGCA     | UGCAGCAUCAUCAGGAUUCU      | Cleavage    | 1 |
| sbi-miR172e    | PvAP2-ERF62  | 1,5 | 16,463 | 1 | 20 | 3200 | 3219 | UGAAUCUUGAUGAUGCUGCA     | UGCAGCAUCAUCAGGAUUCU      | Cleavage    | 1 |
| sbi-miR172e    | PvAP2-ERF173 | 1,5 | 11,33  | 1 | 20 | 3656 | 3675 | UGAAUCUUGAUGAUGCUGCA     | UGCAGCAUCAUCAGGAUUCU      | Cleavage    | 1 |
| sbi-miR172e    | PvAP2-ERF78  | 1,5 | 10,114 | 1 | 20 | 3797 | 3816 | UGAAUCUUGAUGAUGCUGCA     | UGCAGCAUCAUCAGGAUUCU      | Cleavage    | 1 |
| sbi-miR172e    | PvAP2-ERF113 | 2   | 22,52  | 1 | 20 | 3572 | 3591 | UGAAUCUUGAUGAUGCUGCA     | AGCAGCAUCAUCAGGAUUCG      | Cleavage    | 1 |
| sbi-miR172f    | PvAP2-ERF78  | 0   | 10,114 | 1 | 20 | 3797 | 3816 | AGAAUCUUGAUGAUGCUGCA     | UGCAGCAUCAUCAGGAUUCU      | Cleavage    | 1 |
| sbi-miR172f    | PvAP2-ERF173 | 0   | 11,33  | 1 | 20 | 3656 | 3675 | AGAAUCUUGAUGAUGCUGCA     | UGCAGCAUCAUCAGGAUUCU      | Cleavage    | 1 |
| sbi-miR172f    | PvAP2-ERF62  | 1   | 16,463 | 1 | 20 | 3200 | 3219 | AGAAUCUUGAUGAUGCUGCA     | UGCAGCAUCAUCAGGAUUCU      | Cleavage    | 1 |
| sbi-miR172f    | PvAP2-ERF25  | 1   | 16,15  | 1 | 20 | 3064 | 3083 | AGAAUCUUGAUGAUGCUGCA     | UGCAGCAUCAUCAGGAUUCU      | Cleavage    | 1 |
| sbi-miR172f    | PvAP2-ERF20  | 1   | 9,626  | 1 | 20 | 2530 | 2549 | AGAAUCUUGAUGAUGCUGCA     | UGCAGCAUCAUCAGGAUUCU      | Cleavage    | 1 |
| sbi-miR172f    | PvAP2-ERF113 | 2   | 22,52  | 1 | 20 | 3572 | 3591 | AGAAUCUUGAUGAUGCUGCA     | AGCAGCAUCAUCAGGAUUCG      | Cleavage    | 1 |
| sbi-miR5570    | PvAP2-ERF141 | 3   | 13,82  | 1 | 20 | 407  | 426  | AAAAGACAAAUCAGCAUGUC     | GAUUUUCUGGUUUGUCUUUU      | Cleavage    | 1 |
| sbi-miR6228-3p | PvAP2-ERF60  | 3   | 14,82  | 1 | 24 | 1480 | 1503 | GUGGCAGUJAGAAUUAUGAAGGGA | UGCUGCAUUUGAUUCUGGUUGCCAU | Cleavage    | 1 |
| sbi-miR6233-3p | PvAP2-ERF23  | 3   | 12,748 | 1 | 20 | 1870 | 1888 | CAAGUUUGGUUUUGGUAUUU     | AAUUUAUCAAAC-GAUCUUG      | Cleavage    | 1 |
| sbi-miR821a    | PvAP2-ERF46  | 3   | 17,925 | 1 | 21 | 2190 | 2210 | AGAUCAUCAACAUAAGGUUG     | UGAUUUUGAUUUUGAUGACUU     | Translation | 1 |
| sbi-miR821b    | PvAP2-ERF65  | 3   | 13,105 | 1 | 21 | 1046 | 1066 | AAGUUUAAGAACAUAAAAGUUG   | UAACUUUGAUGUCCAUUGUUU     | Translation | 1 |
| sbi-miR821b    | PvAP2-ERF113 | 3   | 20,581 | 1 | 20 | 1250 | 1269 | AAGUUUAAGAACAUAAAAGUUG   | AACUUUUGAUGUUUAGUUU       | Translation | 1 |
| sbi-miR821c    | PvAP2-ERF46  | 3   | 17,925 | 1 | 21 | 2190 | 2210 | AAGUCAUCAACAUAAGGUUG     | UGAUUUUGAUUUUGAUGACUU     | Translation | 1 |
| sbi-miR821d    | PvAP2-ERF46  | 3   | 17,925 | 1 | 21 | 2190 | 2210 | AAGUCAUCAACAUAAGGUUG     | UGAUUUUGAUUUUGAUGACUU     | Translation | 1 |
| sbi-miR821e    | PvAP2-ERF46  | 2   | 17,925 | 1 | 21 | 2190 | 2210 | AAGUCAUCAAAAUAAGGUUG     | UGAUUUUGAUUUUGAUGACUU     | Cleavage    | 1 |

**Solanum lycopersicum**

| miRNA_Acc.  | Target_Acc.  | Expectation | UPE    | miRNA_start | miRNA_end | Target_start | Target_end | miRNA_aligned_fragment | Target_aligned_fragment | Inhibition | Target_Desc. | Multiplicity |
|-------------|--------------|-------------|--------|-------------|-----------|--------------|------------|------------------------|-------------------------|------------|--------------|--------------|
| sly-miR172a | PvAP2-ERF173 | 0,5         | 11,33  | 1           | 20        | 3656         | 3675       | AGAAUCUUGAUGAUGCUGCA   | UGCAGCAUCAUCAGGAUUCU    | Cleavage   |              | 1            |
| sly-miR172a | PvAP2-ERF78  | 0,5         | 10,114 | 1           | 20        | 3797         | 3816       | AGAAUCUUGAUGAUGCUGCA   | UGCAGCAUCAUCAGGAUUCU    | Cleavage   |              | 1            |
| sly-miR172a | PvAP2-ERF20  | 1,5         | 9,626  | 1           | 20        | 2530         | 2549       | AGAAUCUUGAUGAUGCUGCA   | UGCAGCAUCAUCAGGAUUCU    | Cleavage   |              | 1            |
| sly-miR172a | PvAP2-ERF25  | 1,5         | 16,15  | 1           | 20        | 3064         | 3083       | AGAAUCUUGAUGAUGCUGCA   | UGCAGCAUCAUCAGGAUUCU    | Cleavage   |              | 1            |
| sly-miR172a | PvAP2-ERF62  | 1,5         | 16,463 | 1           | 20        | 3200         | 3219       | AGAAUCUUGAUGAUGCUGCA   | UGCAGCAUCAUCAGGAUUCU    | Cleavage   |              | 1            |
| sly-miR172a | PvAP2-ERF113 | 2,5         | 22,52  | 1           | 20        | 3572         | 3591       | AGAAUCUUGAUGAUGCUGCA   | AGCAGCAUCAUCAGGAUUCG    | Cleavage   |              | 1            |
| sly-miR172b | PvAP2-ERF173 | 0,5         | 11,33  | 1           | 20        | 3656         | 3675       | AGAAUCUUGAUGAUGCUGCA   | UGCAGCAUCAUCAGGAUUCU    | Cleavage   |              | 1            |
| sly-miR172b | PvAP2-ERF78  | 0,5         | 10,114 | 1           | 20        | 3797         | 3816       | AGAAUCUUGAUGAUGCUGCA   | UGCAGCAUCAUCAGGAUUCU    | Cleavage   |              | 1            |
| sly-miR172b | PvAP2-ERF20  | 1,5         | 9,626  | 1           | 20        | 2530         | 2549       | AGAAUCUUGAUGAUGCUGCA   | UGCAGCAUCAUCAGGAUUCU    | Cleavage   |              | 1            |
| sly-miR172b | PvAP2-ERF25  | 1,5         | 16,15  | 1           | 20        | 3064         | 3083       | AGAAUCUUGAUGAUGCUGCA   | UGCAGCAUCAUCAGGAUUCU    | Cleavage   |              | 1            |
| sly-miR172b | PvAP2-ERF62  | 1,5         | 16,463 | 1           | 20        | 3200         | 3219       | AGAAUCUUGAUGAUGCUGCA   | UGCAGCAUCAUCAGGAUUCU    | Cleavage   |              | 1            |
| sly-miR172b | PvAP2-ERF113 | 2,5         | 22,52  | 1           | 20        | 3572         | 3591       | AGAAUCUUGAUGAUGCUGCA   | AGCAGCAUCAUCAGGAUUCG    | Cleavage   |              | 1            |
| sly-miR5302 | PvAP2-ERF90  | 2,5         | 13,664 | 1           | 20        | 204          | 222        | AAACGAGGUUUGUJACUUUG   | CGAAG-AACAAACCUCGUUU    | Cleavage   |              | 1            |

**Selaginella moellendorffii**

| miRNA_Acc.  | Target_Acc.  | Expectation | UPE    | miRNA_start | miRNA_end | Target_start | Target_end | miRNA_aligned_fragment | Target_aligned_fragment | Inhibition | Target_Desc. | Multiplicity |
|-------------|--------------|-------------|--------|-------------|-----------|--------------|------------|------------------------|-------------------------|------------|--------------|--------------|
| smo-miR1097 | PvAP2-ERF42  | 3           | 16,633 | 1           | 20        | 569          | 588        | UAGCCAUUGUUGUUGUUGGA   | UCCAACAACAACAGUGUCUC    | Cleavage   |              | 1            |
| smo-miR1106 | PvAP2-ERF60  | 2,5         | 10,415 | 1           | 20        | 3171         | 3190       | UUUAAAGGUGUUUAUGUGUG   | UACACAAUAAUUCUUUAAA     | Cleavage   |              | 1            |
| smo-miR156c | PvAP2-ERF117 | 3           | 21,038 | 1           | 20        | 383          | 402        | UUGACAGAAGAAAGAGAGCA   | UCUUCUUUCUUUCUGUCA      | Cleavage   |              | 1            |

**Salvia sclarea**

| miRNA_Acc.               | Target_Acc.  | Expectation | UPE    | miRNA_start | miRNA_end | Target_start | Target_end | miRNA_aligned_fragment | Target_aligned_fragment  | Inhibition  | Target_Desc.     | Multiplicity |
|--------------------------|--------------|-------------|--------|-------------|-----------|--------------|------------|------------------------|--------------------------|-------------|------------------|--------------|
| ssl-miR172               | PvAP2-ERF173 | 0,5         | 11,33  | 1           | 20        | 3656         | 3675       | AGAAUCUUGAUGAUGCUGCA   | UGCAGCAUCAUCAGGAUUCU     | Cleavage    |                  | 1            |
| ssl-miR172               | PvAP2-ERF78  | 0,5         | 10,114 | 1           | 20        | 3797         | 3816       | AGAAUCUUGAUGAUGCUGCA   | UGCAGCAUCAUCAGGAUUCU     | Cleavage    |                  | 1            |
| ssl-miR172               | PvAP2-ERF20  | 1,5         | 9,626  | 1           | 20        | 2530         | 2549       | AGAAUCUUGAUGAUGCUGCA   | UGCAGCAUCAUCAGGAUUCU     | Cleavage    |                  | 1            |
| ssl-miR172               | PvAP2-ERF25  | 1,5         | 16,15  | 1           | 20        | 3064         | 3083       | AGAAUCUUGAUGAUGCUGCA   | UGCAGCAUCAUCAGGAUUCU     | Cleavage    |                  | 1            |
| ssl-miR172               | PvAP2-ERF62  | 1,5         | 16,463 | 1           | 20        | 3200         | 3219       | AGAAUCUUGAUGAUGCUGCA   | UGCAGCAUCAUCAGGAUUCU     | Cleavage    |                  | 1            |
| ssl-miR172               | PvAP2-ERF113 | 2,5         | 22,52  | 1           | 20        | 3572         | 3591       | AGAAUCUUGAUGAUGCUGCA   | AGCAGCAUCAUCAGGAUUCG     | Cleavage    |                  | 1            |
| <b>Solanum tuberosum</b> |              |             |        |             |           |              |            |                        |                          |             |                  |              |
| miRNA_Acc.               | Target_Acc.  | Expectation | UPE    | miRNA_start | miRNA_end | Target_start | Target_end | miRNA_aligned_fragment | Target_aligned_fragment  | Inhibition  | Target_Desc.     | Multiplicity |
| stu-miR172a-3p           | PvAP2-ERF173 | 0,5         | 11,33  | 1           | 20        | 3656         | 3675       | AGAAUCUUGAUGAUGCUGCA   | UGCAGCAUCAUCAGGAUUCU     | Cleavage    |                  | 1            |
| stu-miR172a-3p           | PvAP2-ERF78  | 0,5         | 10,114 | 1           | 20        | 3797         | 3816       | AGAAUCUUGAUGAUGCUGCA   | UGCAGCAUCAUCAGGAUUCU     | Cleavage    |                  | 1            |
| stu-miR172a-3p           | PvAP2-ERF20  | 1,5         | 9,626  | 1           | 20        | 2530         | 2549       | AGAAUCUUGAUGAUGCUGCA   | UGCAGCAUCAUCAGGAUUCU     | Cleavage    |                  | 1            |
| stu-miR172a-3p           | PvAP2-ERF25  | 1,5         | 16,15  | 1           | 20        | 3064         | 3083       | AGAAUCUUGAUGAUGCUGCA   | UGCAGCAUCAUCAGGAUUCU     | Cleavage    |                  | 1            |
| stu-miR172a-3p           | PvAP2-ERF62  | 1,5         | 16,463 | 1           | 20        | 3200         | 3219       | AGAAUCUUGAUGAUGCUGCA   | UGCAGCAUCAUCAGGAUUCU     | Cleavage    |                  | 1            |
| stu-miR172a-3p           | PvAP2-ERF113 | 2,5         | 22,52  | 1           | 20        | 3572         | 3591       | AGAAUCUUGAUGAUGCUGCA   | AGCAGCAUCAUCAGGAUUCG     | Cleavage    |                  | 1            |
| stu-miR172b-3p           | PvAP2-ERF173 | 0,5         | 11,33  | 1           | 20        | 3656         | 3675       | AGAAUCUUGAUGAUGCUGCA   | UGCAGCAUCAUCAGGAUUCU     | Cleavage    |                  | 1            |
| stu-miR172b-3p           | PvAP2-ERF78  | 0,5         | 10,114 | 1           | 20        | 3797         | 3816       | AGAAUCUUGAUGAUGCUGCA   | UGCAGCAUCAUCAGGAUUCU     | Cleavage    |                  | 1            |
| stu-miR172b-3p           | PvAP2-ERF20  | 1,5         | 9,626  | 1           | 20        | 2530         | 2549       | AGAAUCUUGAUGAUGCUGCA   | UGCAGCAUCAUCAGGAUUCU     | Cleavage    |                  | 1            |
| stu-miR172b-3p           | PvAP2-ERF25  | 1,5         | 16,15  | 1           | 20        | 3064         | 3083       | AGAAUCUUGAUGAUGCUGCA   | UGCAGCAUCAUCAGGAUUCU     | Cleavage    |                  | 1            |
| stu-miR172b-3p           | PvAP2-ERF62  | 1,5         | 16,463 | 1           | 20        | 3200         | 3219       | AGAAUCUUGAUGAUGCUGCA   | UGCAGCAUCAUCAGGAUUCU     | Cleavage    |                  | 1            |
| stu-miR172b-3p           | PvAP2-ERF113 | 2,5         | 22,52  | 1           | 20        | 3572         | 3591       | AGAAUCUUGAUGAUGCUGCA   | AGCAGCAUCAUCAGGAUUCG     | Cleavage    |                  | 1            |
| stu-miR172d-3p           | PvAP2-ERF20  | 0,5         | 9,626  | 1           | 21        | 2529         | 2549       | GAAUCUUGAUGAUGCUGCAG   | CUGCAGCAUCAUCAGGAUUCU    | Cleavage    |                  | 1            |
| stu-miR172d-3p           | PvAP2-ERF25  | 0,5         | 16,15  | 1           | 21        | 3063         | 3083       | GAAUCUUGAUGAUGCUGCAG   | CUGCAGCAUCAUCAGGAUUCU    | Cleavage    |                  | 1            |
| stu-miR172d-3p           | PvAP2-ERF62  | 0,5         | 16,463 | 1           | 21        | 3199         | 3219       | GAAUCUUGAUGAUGCUGCAG   | CUGCAGCAUCAUCAGGAUUCU    | Cleavage    |                  | 1            |
| stu-miR172d-3p           | PvAP2-ERF173 | 1           | 11,33  | 1           | 21        | 3655         | 3675       | GAAUCUUGAUGAUGCUGCAG   | CUGCAGCAUCAUCAGGAUUCU    | Cleavage    |                  | 1            |
| stu-miR172d-3p           | PvAP2-ERF78  | 1           | 10,114 | 1           | 21        | 3796         | 3816       | GAAUCUUGAUGAUGCUGCAG   | CUGCAGCAUCAUCAGGAUUCU    | Cleavage    |                  | 1            |
| stu-miR172d-3p           | PvAP2-ERF113 | 2,5         | 22,52  | 1           | 21        | 3571         | 3591       | GAAUCUUGAUGAUGCUGCAG   | CAGCAGCAUCAUCAGGAUUCG    | Cleavage    |                  | 1            |
| stu-miR172e-3p           | PvAP2-ERF173 | 0,5         | 11,33  | 1           | 20        | 3656         | 3675       | AGAAUCUUGAUGAUGCUGCA   | UGCAGCAUCAUCAGGAUUCU     | Cleavage    |                  | 1            |
| stu-miR172e-3p           | PvAP2-ERF78  | 0,5         | 10,114 | 1           | 20        | 3797         | 3816       | AGAAUCUUGAUGAUGCUGCA   | UGCAGCAUCAUCAGGAUUCU     | Cleavage    |                  | 1            |
| stu-miR172e-3p           | PvAP2-ERF20  | 1,5         | 9,626  | 1           | 20        | 2530         | 2549       | AGAAUCUUGAUGAUGCUGCA   | UGCAGCAUCAUCAGGAUUCU     | Cleavage    |                  | 1            |
| stu-miR172e-3p           | PvAP2-ERF25  | 1,5         | 16,15  | 1           | 20        | 3064         | 3083       | AGAAUCUUGAUGAUGCUGCA   | UGCAGCAUCAUCAGGAUUCU     | Cleavage    |                  | 1            |
| stu-miR172e-3p           | PvAP2-ERF62  | 1,5         | 16,463 | 1           | 20        | 3200         | 3219       | AGAAUCUUGAUGAUGCUGCA   | UGCAGCAUCAUCAGGAUUCU     | Cleavage    |                  | 1            |
| stu-miR172e-3p           | PvAP2-ERF113 | 2,5         | 22,52  | 1           | 20        | 3572         | 3591       | AGAAUCUUGAUGAUGCUGCA   | AGCAGCAUCAUCAGGAUUCG     | Cleavage    |                  | 1            |
| stu-miR172e-5p           | PvAP2-ERF126 | 3           | 17,747 | 1           | 20        | 956          | 975        | GCAACAUCAAGAUUAC       | GAGAAUGAUGAUGAUGUUGC     | Cleavage    |                  | 1            |
| stu-miR408a-3p           | PvAP2-ERF25  | 2,5         | 18,4   | 1           | 21        | 1691         | 1711       | UGCACAGCCUUCUCCUGGUU   | AACCAAGGAAGAGUUUGUCA     | Cleavage    |                  | 1            |
| stu-miR408a-3p           | PvAP2-ERF133 | 2,5         | 17,639 | 1           | 20        | 1330         | 1349       | UGCACAGCCUUCUCCUGGUU   | ACCAAGGAAGAGUUUGUCA      | Cleavage    |                  | 1            |
| stu-miR8004              | PVERF4       | 3           | 16,689 | 1           | 20        | 374          | 393        | AGGGGUUGUGUAUGUUUG     | CAGACACAACACGACCUUU      | Cleavage    | atggtgaaccggccat | 1            |
| stu-miR8011a-5p          | PvAP2-ERF32  | 3           | 14,135 | 1           | 20        | 2653         | 2672       | UUGUGUGAGGUUUUUUUG     | UGAAAGGAAACCUUGCACAG     | Cleavage    |                  | 1            |
| stu-miR8021              | PvAP2-ERF37  | 2,5         | 23,596 | 1           | 24        | 1427         | 1450       | AUUCAGGCUCAACUCGAGACCU | AUGGCGUGGUUUUGAGCCUUGAAU | Cleavage    |                  | 1            |
| stu-miR8032a-3p          | PvAP2-ERF70  | 2,5         | 7,929  | 1           | 22        | 100          | 121        | AGUGUGAGUCGGUGAUAUAGG  | UCUAACCUCACUGACUCACACU   | Cleavage    |                  | 1            |
| stu-miR8032b-3p          | PvAP2-ERF70  | 2,5         | 7,929  | 1           | 22        | 100          | 121        | AGUGUGAGUCGGUGAUAUAGG  | UCUAACCUCACUGACUCACACU   | Cleavage    |                  | 1            |
| stu-miR8032d-3p          | PvAP2-ERF70  | 3           | 7,929  | 1           | 22        | 100          | 121        | AGUGUGAGUCGGUGAUAUAGG  | UCUAACCUCACUGACUCACACU   | Cleavage    |                  | 1            |
| stu-miR8032e-3p          | PvAP2-ERF70  | 2,5         | 7,929  | 1           | 22        | 100          | 121        | AGUGUGAGUCGGUGAUAUAGG  | UCUAACCUCACUGACUCACACU   | Cleavage    |                  | 1            |
| stu-miR8032f-3p          | PvAP2-ERF70  | 2,5         | 7,929  | 1           | 22        | 100          | 121        | AGUGUGAGUCGGUGAUAUAGG  | UCUAACCUCACUGACUCACACU   | Cleavage    |                  | 1            |
| stu-miR8032g-3p          | PvAP2-ERF70  | 2,5         | 7,929  | 1           | 22        | 100          | 121        | AGUGUGAGUCGGUGAUAUAGG  | UCUAACCUCACUGACUCACACU   | Cleavage    |                  | 1            |
| stu-miR8047              | PvAP2-ERF174 | 2,5         | 18,475 | 1           | 19        | 445          | 464        | CCAUUUU-UUCGAAAUUAGA   | UCUAUUUUUGAAGAAAUUGG     | Cleavage    |                  | 1            |
| <b>Triticum aestivum</b> |              |             |        |             |           |              |            |                        |                          |             |                  |              |
| miRNA_Acc.               | Target_Acc.  | Expectation | UPE    | miRNA_start | miRNA_end | Target_start | Target_end | miRNA_aligned_fragment | Target_aligned_fragment  | Inhibition  | Target_Desc.     | Multiplicity |
| tae-miR1134              | PvAP2-ERF55  | 3           | 13,469 | 1           | 22        | 2981         | 3001       | CAACAACAACAAGAAGAAG    | UUUAUUCUUCU-GUUGUUGUUG   | Translation |                  | 1            |
| <b>Theobroma cacao</b>   |              |             |        |             |           |              |            |                        |                          |             |                  |              |
| miRNA_Acc.               | Target_Acc.  | Expectation | UPE    | miRNA_start | miRNA_end | Target_start | Target_end | miRNA_aligned_fragment | Target_aligned_fragment  | Inhibition  | Target_Desc.     | Multiplicity |
| tcc-miR172a              | PvAP2-ERF20  | 0,5         | 9,626  | 1           | 20        | 2530         | 2549       | GAAUCUUGAUGAUGCUGCA    | UGCAGCAUCAUCAGGAUUCU     | Cleavage    |                  | 1            |
| tcc-miR172a              | PvAP2-ERF25  | 0,5         | 16,15  | 1           | 20        | 3064         | 3083       | GAAUCUUGAUGAUGCUGCA    | UGCAGCAUCAUCAGGAUUCU     | Cleavage    |                  | 1            |
| tcc-miR172a              | PvAP2-ERF62  | 0,5         | 16,463 | 1           | 20        | 3200         | 3219       | GAAUCUUGAUGAUGCUGCA    | UGCAGCAUCAUCAGGAUUCU     | Cleavage    |                  | 1            |
| tcc-miR172a              | PvAP2-ERF173 | 1           | 11,33  | 1           | 20        | 3656         | 3675       | GAAUCUUGAUGAUGCUGCA    | UGCAGCAUCAUCAGGAUUCU     | Cleavage    |                  | 1            |

|             |              |     |        |   |    |      |      |                      |                      |          |   |
|-------------|--------------|-----|--------|---|----|------|------|----------------------|----------------------|----------|---|
| tcc-miR172a | PvAP2-ERF78  | 1   | 10,114 | 1 | 20 | 3797 | 3816 | GGAUUCUUGAUGAUGCUGCA | UGCAGCAUCAUCAGGAUUCU | Cleavage | 1 |
| tcc-miR172a | PvAP2-ERF113 | 2,5 | 22,52  | 1 | 20 | 3572 | 3591 | GGAUUCUUGAUGAUGCUGCA | AGCAGCAUCAUCAGGAUUCG | Cleavage | 1 |
| tcc-miR172b | PvAP2-ERF173 | 0,5 | 11,33  | 1 | 20 | 3656 | 3675 | AGAAUCUUGAUGAUGCUGCA | UGCAGCAUCAUCAGGAUUCU | Cleavage | 1 |
| tcc-miR172b | PvAP2-ERF78  | 0,5 | 10,114 | 1 | 20 | 3797 | 3816 | AGAAUCUUGAUGAUGCUGCA | UGCAGCAUCAUCAGGAUUCU | Cleavage | 1 |
| tcc-miR172b | PvAP2-ERF20  | 1,5 | 9,626  | 1 | 20 | 2530 | 2549 | AGAAUCUUGAUGAUGCUGCA | UGCAGCAUCAUCAGGAUUCU | Cleavage | 1 |
| tcc-miR172b | PvAP2-ERF25  | 1,5 | 16,15  | 1 | 20 | 3064 | 3083 | AGAAUCUUGAUGAUGCUGCA | UGCAGCAUCAUCAGGAUUCU | Cleavage | 1 |
| tcc-miR172b | PvAP2-ERF62  | 1,5 | 16,463 | 1 | 20 | 3200 | 3219 | AGAAUCUUGAUGAUGCUGCA | UGCAGCAUCAUCAGGAUUCU | Cleavage | 1 |
| tcc-miR172b | PvAP2-ERF113 | 2,5 | 22,52  | 1 | 20 | 3572 | 3591 | AGAAUCUUGAUGAUGCUGCA | AGCAGCAUCAUCAGGAUUCG | Cleavage | 1 |
| tcc-miR172c | PvAP2-ERF20  | 0,5 | 9,626  | 1 | 20 | 2530 | 2549 | GGAUUCUUGAUGAUGCUGCA | UGCAGCAUCAUCAGGAUUCU | Cleavage | 1 |
| tcc-miR172c | PvAP2-ERF25  | 0,5 | 16,15  | 1 | 20 | 3064 | 3083 | GGAUUCUUGAUGAUGCUGCA | UGCAGCAUCAUCAGGAUUCU | Cleavage | 1 |
| tcc-miR172c | PvAP2-ERF62  | 0,5 | 16,463 | 1 | 20 | 3200 | 3219 | GGAUUCUUGAUGAUGCUGCA | UGCAGCAUCAUCAGGAUUCU | Cleavage | 1 |
| tcc-miR172c | PvAP2-ERF173 | 1   | 11,33  | 1 | 20 | 3656 | 3675 | GGAUUCUUGAUGAUGCUGCA | UGCAGCAUCAUCAGGAUUCU | Cleavage | 1 |
| tcc-miR172c | PvAP2-ERF78  | 1   | 10,114 | 1 | 20 | 3797 | 3816 | GGAUUCUUGAUGAUGCUGCA | UGCAGCAUCAUCAGGAUUCU | Cleavage | 1 |
| tcc-miR172c | PvAP2-ERF113 | 2,5 | 22,52  | 1 | 20 | 3572 | 3591 | GGAUUCUUGAUGAUGCUGCA | AGCAGCAUCAUCAGGAUUCG | Cleavage | 1 |
| tcc-miR172d | PvAP2-ERF173 | 0   | 11,33  | 1 | 20 | 3656 | 3675 | AGAAUCUUGAUGAUGCUGCA | UGCAGCAUCAUCAGGAUUCU | Cleavage | 1 |
| tcc-miR172d | PvAP2-ERF78  | 0   | 10,114 | 1 | 20 | 3797 | 3816 | AGAAUCUUGAUGAUGCUGCA | UGCAGCAUCAUCAGGAUUCU | Cleavage | 1 |
| tcc-miR172d | PvAP2-ERF20  | 1   | 9,626  | 1 | 20 | 2530 | 2549 | AGAAUCUUGAUGAUGCUGCA | UGCAGCAUCAUCAGGAUUCU | Cleavage | 1 |
| tcc-miR172d | PvAP2-ERF25  | 1   | 16,15  | 1 | 20 | 3064 | 3083 | AGAAUCUUGAUGAUGCUGCA | UGCAGCAUCAUCAGGAUUCU | Cleavage | 1 |
| tcc-miR172d | PvAP2-ERF62  | 1   | 16,463 | 1 | 20 | 3200 | 3219 | AGAAUCUUGAUGAUGCUGCA | UGCAGCAUCAUCAGGAUUCU | Cleavage | 1 |
| tcc-miR172d | PvAP2-ERF113 | 2   | 22,52  | 1 | 20 | 3572 | 3591 | AGAAUCUUGAUGAUGCUGCA | AGCAGCAUCAUCAGGAUUCG | Cleavage | 1 |
| tcc-miR172e | PvAP2-ERF173 | 0,5 | 11,33  | 1 | 20 | 3656 | 3675 | AGAAUCUUGAUGAUGCUGCA | UGCAGCAUCAUCAGGAUUCU | Cleavage | 1 |
| tcc-miR172e | PvAP2-ERF78  | 0,5 | 10,114 | 1 | 20 | 3797 | 3816 | AGAAUCUUGAUGAUGCUGCA | UGCAGCAUCAUCAGGAUUCU | Cleavage | 1 |
| tcc-miR172e | PvAP2-ERF20  | 1,5 | 9,626  | 1 | 20 | 2530 | 2549 | AGAAUCUUGAUGAUGCUGCA | UGCAGCAUCAUCAGGAUUCU | Cleavage | 1 |
| tcc-miR172e | PvAP2-ERF25  | 1,5 | 16,15  | 1 | 20 | 3064 | 3083 | AGAAUCUUGAUGAUGCUGCA | UGCAGCAUCAUCAGGAUUCU | Cleavage | 1 |
| tcc-miR172e | PvAP2-ERF62  | 1,5 | 16,463 | 1 | 20 | 3200 | 3219 | AGAAUCUUGAUGAUGCUGCA | UGCAGCAUCAUCAGGAUUCU | Cleavage | 1 |
| tcc-miR172e | PvAP2-ERF113 | 2,5 | 22,52  | 1 | 20 | 3572 | 3591 | AGAAUCUUGAUGAUGCUGCA | AGCAGCAUCAUCAGGAUUCG | Cleavage | 1 |

#### Vigna unguiculata

| miRNA_Acc. | Target_Acc.  | Expectation | UPE    | miRNA_start | miRNA_end | Target_start | Target_end | miRNA_aligned_fragment | Target_aligned_fragment | Inhibition | Target_Desc. | Multiplicity |
|------------|--------------|-------------|--------|-------------|-----------|--------------|------------|------------------------|-------------------------|------------|--------------|--------------|
| vun-miR172 | PvAP2-ERF173 | 0,5         | 11,33  | 1           | 20        | 3656         | 3675       | AGAAUCUUGAUGAUGCUGCA   | UGCAGCAUCAUCAGGAUUCU    | Cleavage   |              | 1            |
| vun-miR172 | PvAP2-ERF78  | 0,5         | 10,114 | 1           | 20        | 3797         | 3816       | AGAAUCUUGAUGAUGCUGCA   | UGCAGCAUCAUCAGGAUUCU    | Cleavage   |              | 1            |
| vun-miR172 | PvAP2-ERF20  | 1,5         | 9,626  | 1           | 20        | 2530         | 2549       | AGAAUCUUGAUGAUGCUGCA   | UGCAGCAUCAUCAGGAUUCU    | Cleavage   |              | 1            |
| vun-miR172 | PvAP2-ERF25  | 1,5         | 16,15  | 1           | 20        | 3064         | 3083       | AGAAUCUUGAUGAUGCUGCA   | UGCAGCAUCAUCAGGAUUCU    | Cleavage   |              | 1            |
| vun-miR172 | PvAP2-ERF62  | 1,5         | 16,463 | 1           | 20        | 3200         | 3219       | AGAAUCUUGAUGAUGCUGCA   | UGCAGCAUCAUCAGGAUUCU    | Cleavage   |              | 1            |
| vun-miR172 | PvAP2-ERF113 | 2,5         | 22,52  | 1           | 20        | 3572         | 3591       | AGAAUCUUGAUGAUGCUGCA   | AGCAGCAUCAUCAGGAUUCG    | Cleavage   |              | 1            |

#### Vitis vinifera

| miRNA_Acc.  | Target_Acc.  | Expectation | UPE    | miRNA_start | miRNA_end | Target_start | Target_end | miRNA_aligned_fragment | Target_aligned_fragment | Inhibition  | Target_Desc. | Multiplicity |
|-------------|--------------|-------------|--------|-------------|-----------|--------------|------------|------------------------|-------------------------|-------------|--------------|--------------|
| vvi-miR156h | PvAP2-ERF131 | 3           | 18,595 | 1           | 20        | 595          | 614        | UGACAGAAGAGAGAGAGCAU   | AUGAUGUCACUUCUGUCA      | Translation |              | 1            |
| vvi-miR156h | PvAP2-ERF128 | 3           | 18,523 | 1           | 20        | 2185         | 2204       | UGACAGAAGAGAGAGAGCAU   | AUUCUCUCUUUCUCUGUCA     | Cleavage    |              | 1            |
| vvi-miR172a | PvAP2-ERF20  | 2,5         | 9,626  | 1           | 20        | 2530         | 2549       | UGAAUCUUGAUGAUGCUGCA   | UGCAGCAUCAUCAGGAUUCU    | Cleavage    |              | 1            |
| vvi-miR172a | PvAP2-ERF25  | 2,5         | 16,15  | 1           | 20        | 3064         | 3083       | UGAAUCUUGAUGAUGCUGCA   | UGCAGCAUCAUCAGGAUUCU    | Cleavage    |              | 1            |
| vvi-miR172a | PvAP2-ERF62  | 2,5         | 16,463 | 1           | 20        | 3200         | 3219       | UGAAUCUUGAUGAUGCUGCA   | UGCAGCAUCAUCAGGAUUCU    | Cleavage    |              | 1            |
| vvi-miR172a | PvAP2-ERF173 | 2,5         | 11,33  | 1           | 20        | 3656         | 3675       | UGAAUCUUGAUGAUGCUGCA   | UGCAGCAUCAUCAGGAUUCU    | Cleavage    |              | 1            |
| vvi-miR172a | PvAP2-ERF78  | 2,5         | 10,114 | 1           | 20        | 3797         | 3816       | UGAAUCUUGAUGAUGCUGCA   | UGCAGCAUCAUCAGGAUUCU    | Cleavage    |              | 1            |
| vvi-miR172a | PvAP2-ERF113 | 3           | 22,52  | 1           | 20        | 3572         | 3591       | UGAAUCUUGAUGAUGCUGCA   | AGCAGCAUCAUCAGGAUUCG    | Cleavage    |              | 1            |
| vvi-miR172b | PvAP2-ERF20  | 2,5         | 9,626  | 1           | 20        | 2530         | 2549       | UGAAUCUUGAUGAUGCUGCA   | UGCAGCAUCAUCAGGAUUCU    | Cleavage    |              | 1            |
| vvi-miR172b | PvAP2-ERF25  | 2,5         | 16,15  | 1           | 20        | 3064         | 3083       | UGAAUCUUGAUGAUGCUGCA   | UGCAGCAUCAUCAGGAUUCU    | Cleavage    |              | 1            |
| vvi-miR172b | PvAP2-ERF62  | 2,5         | 16,463 | 1           | 20        | 3200         | 3219       | UGAAUCUUGAUGAUGCUGCA   | UGCAGCAUCAUCAGGAUUCU    | Cleavage    |              | 1            |
| vvi-miR172b | PvAP2-ERF173 | 2,5         | 11,33  | 1           | 20        | 3656         | 3675       | UGAAUCUUGAUGAUGCUGCA   | UGCAGCAUCAUCAGGAUUCU    | Cleavage    |              | 1            |
| vvi-miR172b | PvAP2-ERF78  | 2,5         | 10,114 | 1           | 20        | 3797         | 3816       | UGAAUCUUGAUGAUGCUGCA   | UGCAGCAUCAUCAGGAUUCU    | Cleavage    |              | 1            |
| vvi-miR172b | PvAP2-ERF113 | 3           | 22,52  | 1           | 20        | 3572         | 3591       | UGAAUCUUGAUGAUGCUGCA   | AGCAGCAUCAUCAGGAUUCG    | Cleavage    |              | 1            |
| vvi-miR172c | PvAP2-ERF20  | 0,5         | 9,626  | 1           | 21        | 2529         | 2549       | GGAUUCUUGAUGAUGCUGCAG  | CUGCAGCAUCAUCAGGAUUCU   | Cleavage    |              | 1            |
| vvi-miR172c | PvAP2-ERF25  | 0,5         | 16,15  | 1           | 21        | 3063         | 3083       | GGAUUCUUGAUGAUGCUGCAG  | CUGCAGCAUCAUCAGGAUUCU   | Cleavage    |              | 1            |
| vvi-miR172c | PvAP2-ERF62  | 0,5         | 16,463 | 1           | 21        | 3199         | 3219       | GGAUUCUUGAUGAUGCUGCAG  | CUGCAGCAUCAUCAGGAUUCU   | Cleavage    |              | 1            |
| vvi-miR172c | PvAP2-ERF173 | 1           | 11,33  | 1           | 21        | 3655         | 3675       | GGAUUCUUGAUGAUGCUGCAG  | CUGCAGCAUCAUCAGGAUUCU   | Cleavage    |              | 1            |
| vvi-miR172c | PvAP2-ERF78  | 1           | 10,114 | 1           | 21        | 3796         | 3816       | GGAUUCUUGAUGAUGCUGCAG  | CUGCAGCAUCAUCAGGAUUCU   | Cleavage    |              | 1            |

|                 |              |     |        |   |    |      |      |                        |                        |             |   |
|-----------------|--------------|-----|--------|---|----|------|------|------------------------|------------------------|-------------|---|
| vvi-miR172c     | PvAP2-ERF113 | 2,5 | 22,52  | 1 | 21 | 3571 | 3591 | GGAUUCUUGAUGAUGCUGCAG  | CAGCAGCAUCAUCAGGAUUCG  | Cleavage    | 1 |
| vvi-miR172d     | PvAP2-ERF173 | 0,5 | 11,541 | 1 | 22 | 3656 | 3677 | UGAGAAUCUUGAUGAUGCUGCA | UGCAGCAUCAUCAGGAUUCUCA | Cleavage    | 1 |
| vvi-miR172d     | PvAP2-ERF78  | 0,5 | 5,882  | 1 | 22 | 3797 | 3818 | UGAGAAUCUUGAUGAUGCUGCA | UGCAGCAUCAUCAGGAUUCUCA | Cleavage    | 1 |
| vvi-miR172d     | PvAP2-ERF25  | 2   | 16,394 | 1 | 22 | 3064 | 3085 | UGAGAAUCUUGAUGAUGCUGCA | UGCAGCAUCAUCAGGAUUCUCA | Cleavage    | 1 |
| vvi-miR172d     | PvAP2-ERF62  | 2   | 18,825 | 1 | 22 | 3200 | 3221 | UGAGAAUCUUGAUGAUGCUGCA | UGCAGCAUCAUCAGGAUUCUCA | Cleavage    | 1 |
| vvi-miR172d     | PvAP2-ERF20  | 3   | 9,676  | 1 | 22 | 2530 | 2551 | UGAGAAUCUUGAUGAUGCUGCA | UGCAGCAUCAUCAGGAUUCUCA | Cleavage    | 1 |
| vvi-miR3633a-5p | PvAP2-ERF125 | 3   | 8,263  | 1 | 20 | 1066 | 1085 | GGAUUGAUGGUUAGGAGAG    | CUCUCCAAUUCUUAUUC      | Translation | 1 |

**Zea mays**

| miRNA_Acc.      | Target_Acc.  | Expectation | UPE    | miRNA_start | miRNA_end | Target_start | Target_end | miRNA_aligned_fragment | Target_aligned_fragment | Inhibition  | Target_Desc. | Multiplicity |
|-----------------|--------------|-------------|--------|-------------|-----------|--------------|------------|------------------------|-------------------------|-------------|--------------|--------------|
| zma-miR156e-3p  | PvAP2-ERF46  | 3           | 15,813 | 1           | 22        | 2164         | 2185       | GCUCACUGCUCUCUCUGUCAUC | GAUGACAGUGAGCCAGUGAGC   | Translation |              | 1            |
| zma-miR156h-3p  | PVERF3       | 3           | 23,803 | 1           | 20        | 2745         | 2764       | GCUCACUGCUCUCUCUGUCAUC | UUGCAGAAAGAGUAGUGGGU    | Cleavage    |              | 1            |
| zma-miR159e-5p  | PvAP2-ERF171 | 3           | 16,656 | 1           | 21        | 862          | 882        | CAGCUCUCGAGCAUCUGUUC   | GAGCAGAUAGUUCAGGAGUUG   | Translation |              | 1            |
| zma-miR159g-3p  | PvAP2-ERF135 | 2,5         | 1,098  | 1           | 20        | 41           | 60         | UUUGGAGUGAAGGGAGUUCU   | AAACCCUCUCUUCACUCCAAA   | Cleavage    |              | 1            |
| zma-miR159h-3p  | PvAP2-ERF135 | 2,5         | 1,098  | 1           | 20        | 41           | 60         | UUUGGAGUGAAGGGAGCUCU   | AAACCCUCUCUUCACUCCAAA   | Cleavage    |              | 1            |
| zma-miR159i-3p  | PvAP2-ERF135 | 2,5         | 1,098  | 1           | 20        | 41           | 60         | UUUGGAGUGAAGGGAGCUCU   | AAACCCUCUCUUCACUCCAAA   | Cleavage    |              | 1            |
| zma-miR171g-5p  | PvAP2-ERF179 | 3           | 17,265 | 1           | 20        | 2151         | 2170       | UAUUGACUUGGCUCUCUCUCU  | AAAGAUAGUAAAGUUAUA      | Translation |              | 1            |
| zma-miR172a     | PvAP2-ERF173 | 0,5         | 11,33  | 1           | 20        | 3656         | 3675       | AGAAUCUUGAUGAUGCUGCA   | UGCAGCAUCAUCAGGAUUCU    | Cleavage    |              | 1            |
| zma-miR172a     | PvAP2-ERF78  | 0,5         | 10,114 | 1           | 20        | 3797         | 3816       | AGAAUCUUGAUGAUGCUGCA   | UGCAGCAUCAUCAGGAUUCU    | Cleavage    |              | 1            |
| zma-miR172a     | PvAP2-ERF20  | 1,5         | 9,626  | 1           | 20        | 2530         | 2549       | AGAAUCUUGAUGAUGCUGCA   | UGCAGCAUCAUCAGGAUUCU    | Cleavage    |              | 1            |
| zma-miR172a     | PvAP2-ERF25  | 1,5         | 16,15  | 1           | 20        | 3064         | 3083       | AGAAUCUUGAUGAUGCUGCA   | UGCAGCAUCAUCAGGAUUCU    | Cleavage    |              | 1            |
| zma-miR172a     | PvAP2-ERF62  | 1,5         | 16,463 | 1           | 20        | 3200         | 3219       | AGAAUCUUGAUGAUGCUGCA   | UGCAGCAUCAUCAGGAUUCU    | Cleavage    |              | 1            |
| zma-miR172a     | PvAP2-ERF113 | 2,5         | 22,52  | 1           | 20        | 3572         | 3591       | AGAAUCUUGAUGAUGCUGCA   | AGCAGCAUCAUCAGGAUUCG    | Cleavage    |              | 1            |
| zma-miR172b-3p  | PvAP2-ERF173 | 0,5         | 11,33  | 1           | 20        | 3656         | 3675       | AGAAUCUUGAUGAUGCUGCA   | UGCAGCAUCAUCAGGAUUCU    | Cleavage    |              | 1            |
| zma-miR172b-3p  | PvAP2-ERF78  | 0,5         | 10,114 | 1           | 20        | 3797         | 3816       | AGAAUCUUGAUGAUGCUGCA   | UGCAGCAUCAUCAGGAUUCU    | Cleavage    |              | 1            |
| zma-miR172b-3p  | PvAP2-ERF20  | 1,5         | 9,626  | 1           | 20        | 2530         | 2549       | AGAAUCUUGAUGAUGCUGCA   | UGCAGCAUCAUCAGGAUUCU    | Cleavage    |              | 1            |
| zma-miR172b-3p  | PvAP2-ERF25  | 1,5         | 16,15  | 1           | 20        | 3064         | 3083       | AGAAUCUUGAUGAUGCUGCA   | UGCAGCAUCAUCAGGAUUCU    | Cleavage    |              | 1            |
| zma-miR172b-3p  | PvAP2-ERF62  | 1,5         | 16,463 | 1           | 20        | 3200         | 3219       | AGAAUCUUGAUGAUGCUGCA   | UGCAGCAUCAUCAGGAUUCU    | Cleavage    |              | 1            |
| zma-miR172b-3p  | PvAP2-ERF113 | 2,5         | 22,52  | 1           | 20        | 3572         | 3591       | AGAAUCUUGAUGAUGCUGCA   | AGCAGCAUCAUCAGGAUUCG    | Cleavage    |              | 1            |
| zma-miR172c-3p  | PvAP2-ERF173 | 0,5         | 11,33  | 1           | 20        | 3656         | 3675       | AGAAUCUUGAUGAUGCUGCA   | UGCAGCAUCAUCAGGAUUCU    | Cleavage    |              | 1            |
| zma-miR172c-3p  | PvAP2-ERF78  | 0,5         | 10,114 | 1           | 20        | 3797         | 3816       | AGAAUCUUGAUGAUGCUGCA   | UGCAGCAUCAUCAGGAUUCU    | Cleavage    |              | 1            |
| zma-miR172c-3p  | PvAP2-ERF20  | 1,5         | 9,626  | 1           | 20        | 2530         | 2549       | AGAAUCUUGAUGAUGCUGCA   | UGCAGCAUCAUCAGGAUUCU    | Cleavage    |              | 1            |
| zma-miR172c-3p  | PvAP2-ERF25  | 1,5         | 16,15  | 1           | 20        | 3064         | 3083       | AGAAUCUUGAUGAUGCUGCA   | UGCAGCAUCAUCAGGAUUCU    | Cleavage    |              | 1            |
| zma-miR172c-3p  | PvAP2-ERF62  | 1,5         | 16,463 | 1           | 20        | 3200         | 3219       | AGAAUCUUGAUGAUGCUGCA   | UGCAGCAUCAUCAGGAUUCU    | Cleavage    |              | 1            |
| zma-miR172c-3p  | PvAP2-ERF113 | 2,5         | 22,52  | 1           | 20        | 3572         | 3591       | AGAAUCUUGAUGAUGCUGCA   | AGCAGCAUCAUCAGGAUUCG    | Cleavage    |              | 1            |
| zma-miR172d-3p  | PvAP2-ERF78  | 0,5         | 10,114 | 1           | 20        | 3797         | 3816       | AGAAUCUUGAUGAUGCUGCA   | UGCAGCAUCAUCAGGAUUCU    | Cleavage    |              | 1            |
| zma-miR172d-3p  | PvAP2-ERF173 | 0,5         | 11,33  | 1           | 20        | 3656         | 3675       | AGAAUCUUGAUGAUGCUGCA   | UGCAGCAUCAUCAGGAUUCU    | Cleavage    |              | 1            |
| zma-miR172d-3p  | PvAP2-ERF62  | 1,5         | 16,463 | 1           | 20        | 3200         | 3219       | AGAAUCUUGAUGAUGCUGCA   | UGCAGCAUCAUCAGGAUUCU    | Cleavage    |              | 1            |
| zma-miR172d-3p  | PvAP2-ERF25  | 1,5         | 16,15  | 1           | 20        | 3064         | 3083       | AGAAUCUUGAUGAUGCUGCA   | UGCAGCAUCAUCAGGAUUCU    | Cleavage    |              | 1            |
| zma-miR172d-3p  | PvAP2-ERF20  | 1,5         | 9,626  | 1           | 20        | 2530         | 2549       | AGAAUCUUGAUGAUGCUGCA   | UGCAGCAUCAUCAGGAUUCU    | Cleavage    |              | 1            |
| zma-miR172d-3p  | PvAP2-ERF113 | 2,5         | 22,52  | 1           | 20        | 3572         | 3591       | AGAAUCUUGAUGAUGCUGCA   | AGCAGCAUCAUCAGGAUUCG    | Cleavage    |              | 1            |
| zma-miR172e     | PvAP2-ERF20  | 0,5         | 9,626  | 1           | 20        | 2530         | 2549       | GGAUUCUUGAUGAUGCUGCA   | UGCAGCAUCAUCAGGAUUCU    | Cleavage    |              | 1            |
| zma-miR172e     | PvAP2-ERF25  | 0,5         | 16,15  | 1           | 20        | 3064         | 3083       | GGAUUCUUGAUGAUGCUGCA   | UGCAGCAUCAUCAGGAUUCU    | Cleavage    |              | 1            |
| zma-miR172e     | PvAP2-ERF62  | 0,5         | 16,463 | 1           | 20        | 3200         | 3219       | GGAUUCUUGAUGAUGCUGCA   | UGCAGCAUCAUCAGGAUUCU    | Cleavage    |              | 1            |
| zma-miR172e     | PvAP2-ERF173 | 1           | 11,33  | 1           | 20        | 3656         | 3675       | GGAUUCUUGAUGAUGCUGCA   | UGCAGCAUCAUCAGGAUUCU    | Cleavage    |              | 1            |
| zma-miR172e     | PvAP2-ERF78  | 1           | 10,114 | 1           | 20        | 3797         | 3816       | GGAUUCUUGAUGAUGCUGCA   | UGCAGCAUCAUCAGGAUUCU    | Cleavage    |              | 1            |
| zma-miR172e     | PvAP2-ERF113 | 2,5         | 22,52  | 1           | 20        | 3572         | 3591       | GGAUUCUUGAUGAUGCUGCA   | AGCAGCAUCAUCAGGAUUCG    | Cleavage    |              | 1            |
| zma-miR2275a-3p | PvAP2-ERF7   | 2,5         | 16,862 | 1           | 22        | 1455         | 1476       | UUUGUUUCCUCCAAUUCUCA   | UGAGAAUUGGAGGAAACCAA    | Cleavage    |              | 1            |
| zma-miR2275d-3p | PvAP2-ERF7   | 3           | 16,862 | 1           | 22        | 1455         | 1476       | UUUGUUUCCUCCAAUUCUCA   | UGAGAAUUGGAGGAAACCAA    | Cleavage    |              | 1            |
